# Supplementary material for: 高強度鋼の表面および内部起点型疲労特性に及ぼす応力比の影響(鉄鋼材料, ギガサイクル疲労)
Source: Royal Society of Chemistry journal article supplement (doi:10.1039/c5ob02596f), 2004-08-25

Supporting Information

**Simple assembly of polysubstituted pyrazoles and isoxazoles via ring closure–ring opening domino reaction of 3-acyl-4,5-dihydrofurans with hydrazines and hydroxylamine**

Alexey O. Chagarovskiy,<sup>†,‡</sup> Ekaterina M. Budynina,<sup>†,‡</sup> Olga A. Ivanova,<sup>†,‡</sup> Victor B. Rybakov,<sup>†</sup>  
Igor V. Trushkov,<sup>†,‡,\*</sup> Mikhail Ya. Melnikov<sup>†</sup>

<sup>†</sup>Department of Chemistry, M. V. Lomonosov Moscow State University, Leninskie gory 1-3, Moscow 119991 Russia, e-mail:  
trush@phys.chem.msu.ru

<sup>‡</sup>Federal Research Center of Pediatric Hematology, Oncology and Immunology named after Dmitrii Rogachev, Samory Mashela 1, Moscow 117997  
Russia

*1-[4-(3,4-Dimethoxyphenyl)-2-methyl-4,5-dihydrofuran-3-yl]ethan-1-one (1d)*

<sup>1</sup>H NMR (CDCl<sub>3</sub>, 600 MHz)

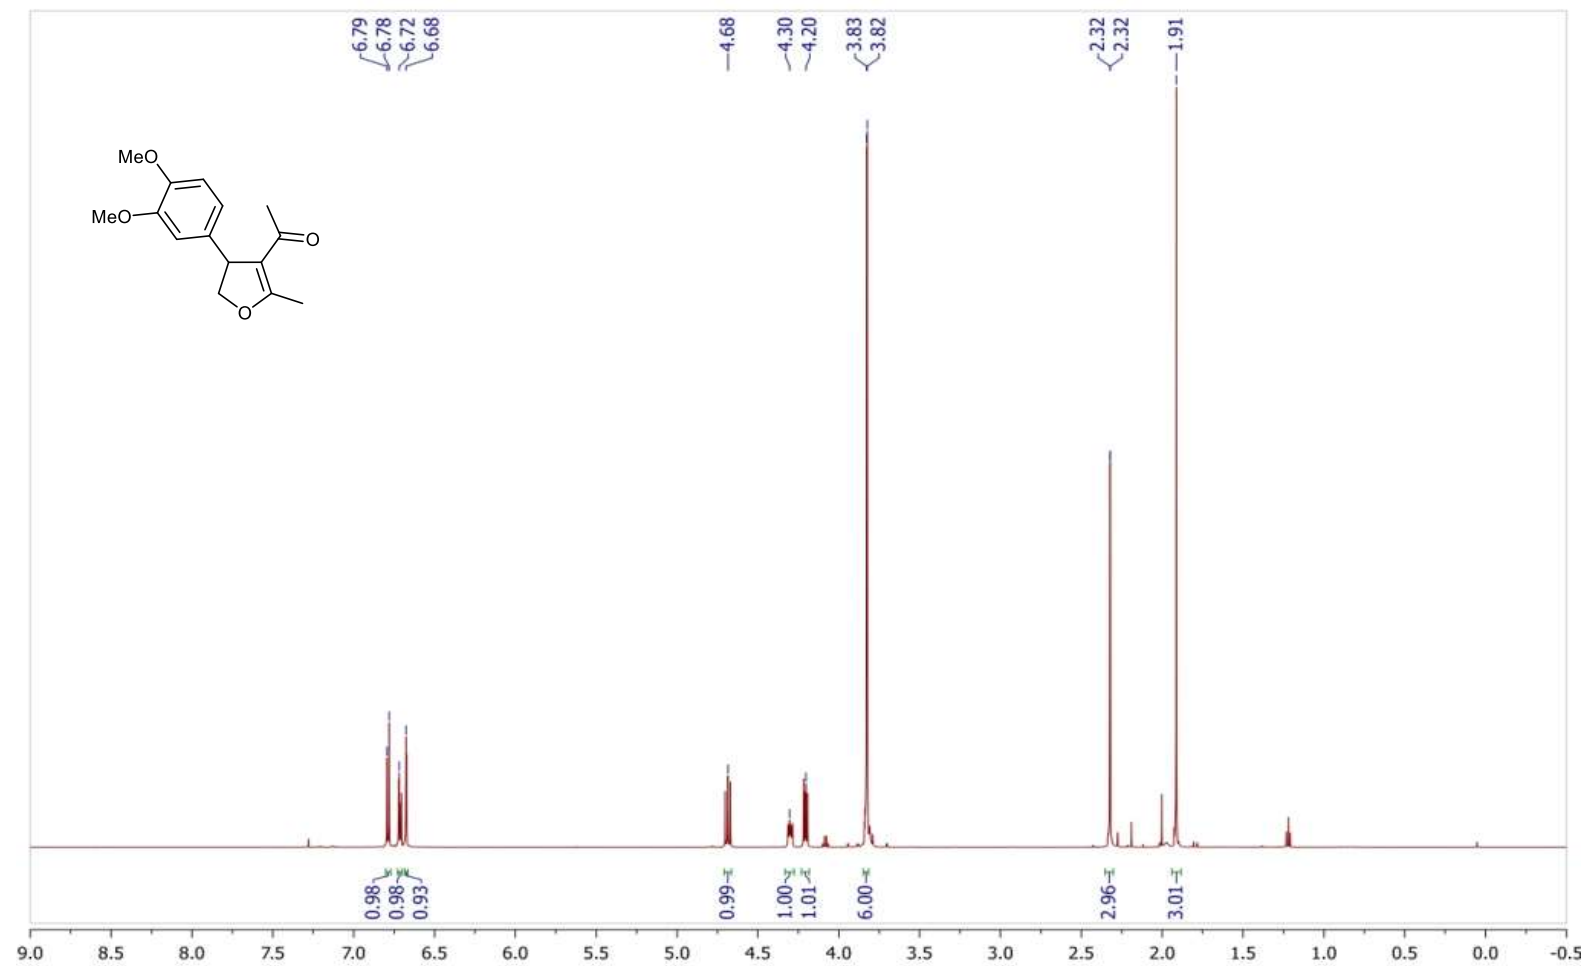

*1-[4-(3,4-Dimethoxyphenyl)-2-methyl-4,5-dihydrofuran-3-yl]ethan-1-one (1d)*

$^{13}\text{C}$  NMR ( $\text{CDCl}_3$ , 150 MHz)

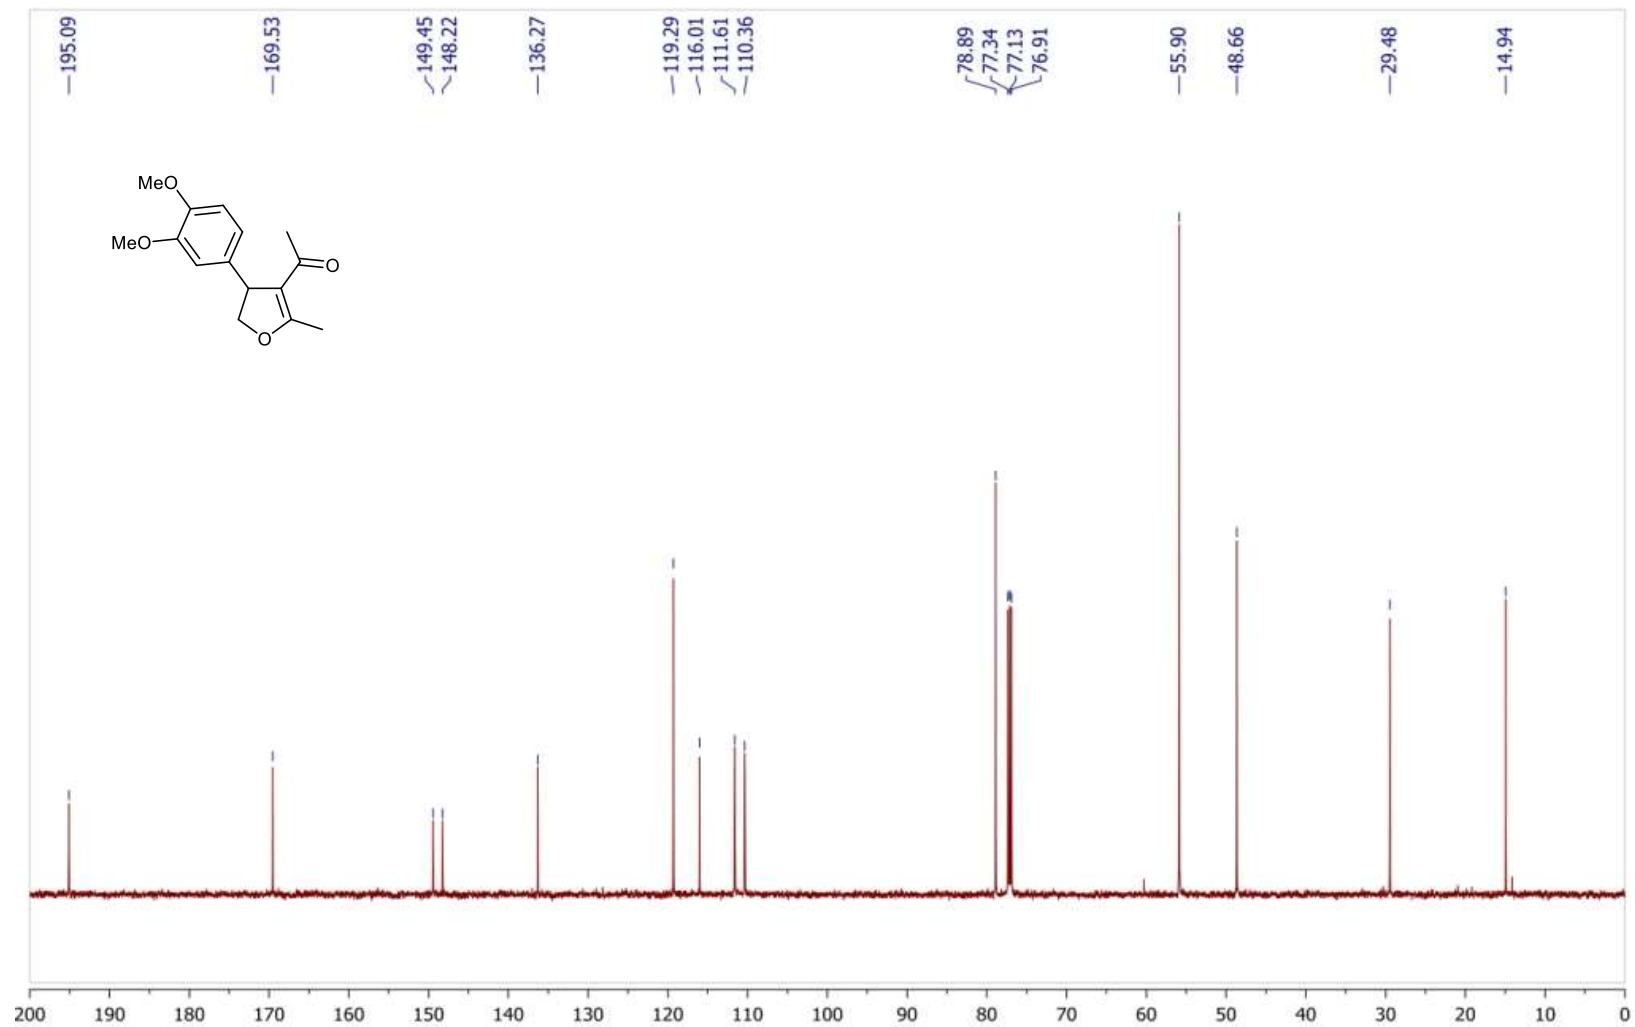

*1-[2-Methyl-4-(1-methyl-1H-indol-2-yl)-4,5-dihydrofuran-3-yl]ethan-1-one (1g)*

<sup>1</sup>H NMR (CDCl<sub>3</sub>, 600 MHz)

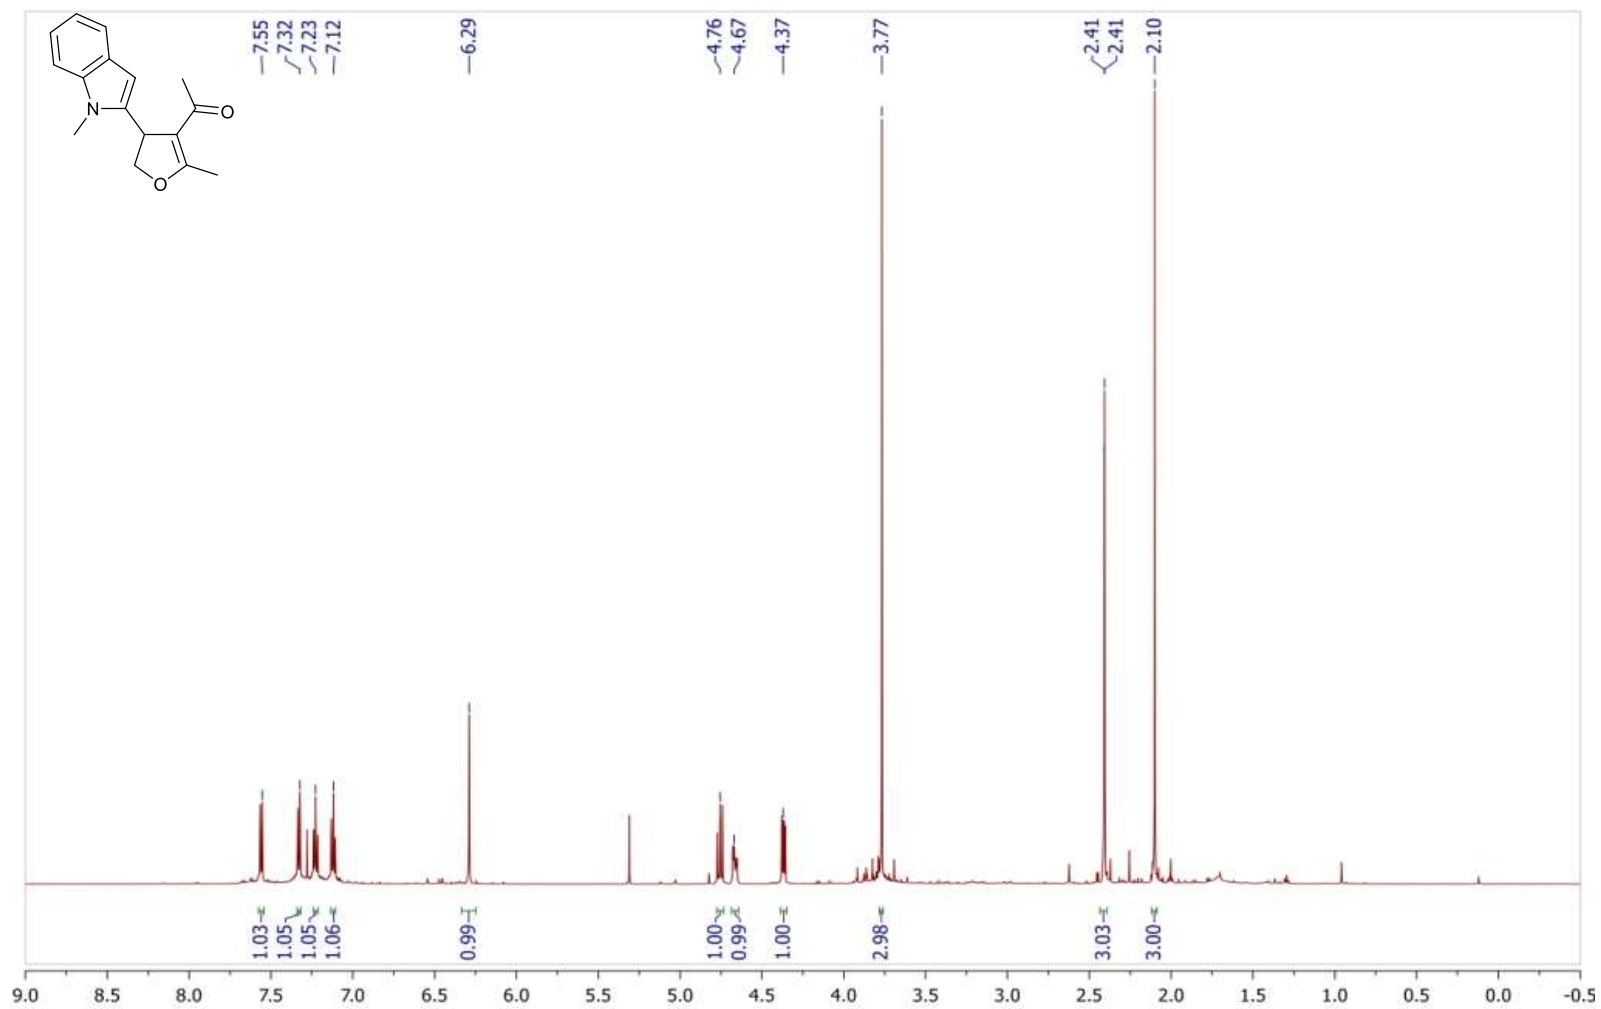

*1-[2-Methyl-4-(1-methyl-1H-indol-2-yl)-4,5-dihydrofuran-3-yl]ethan-1-one (1g)*

$^{13}\text{C}$  NMR ( $\text{CDCl}_3$ , 150 MHz)

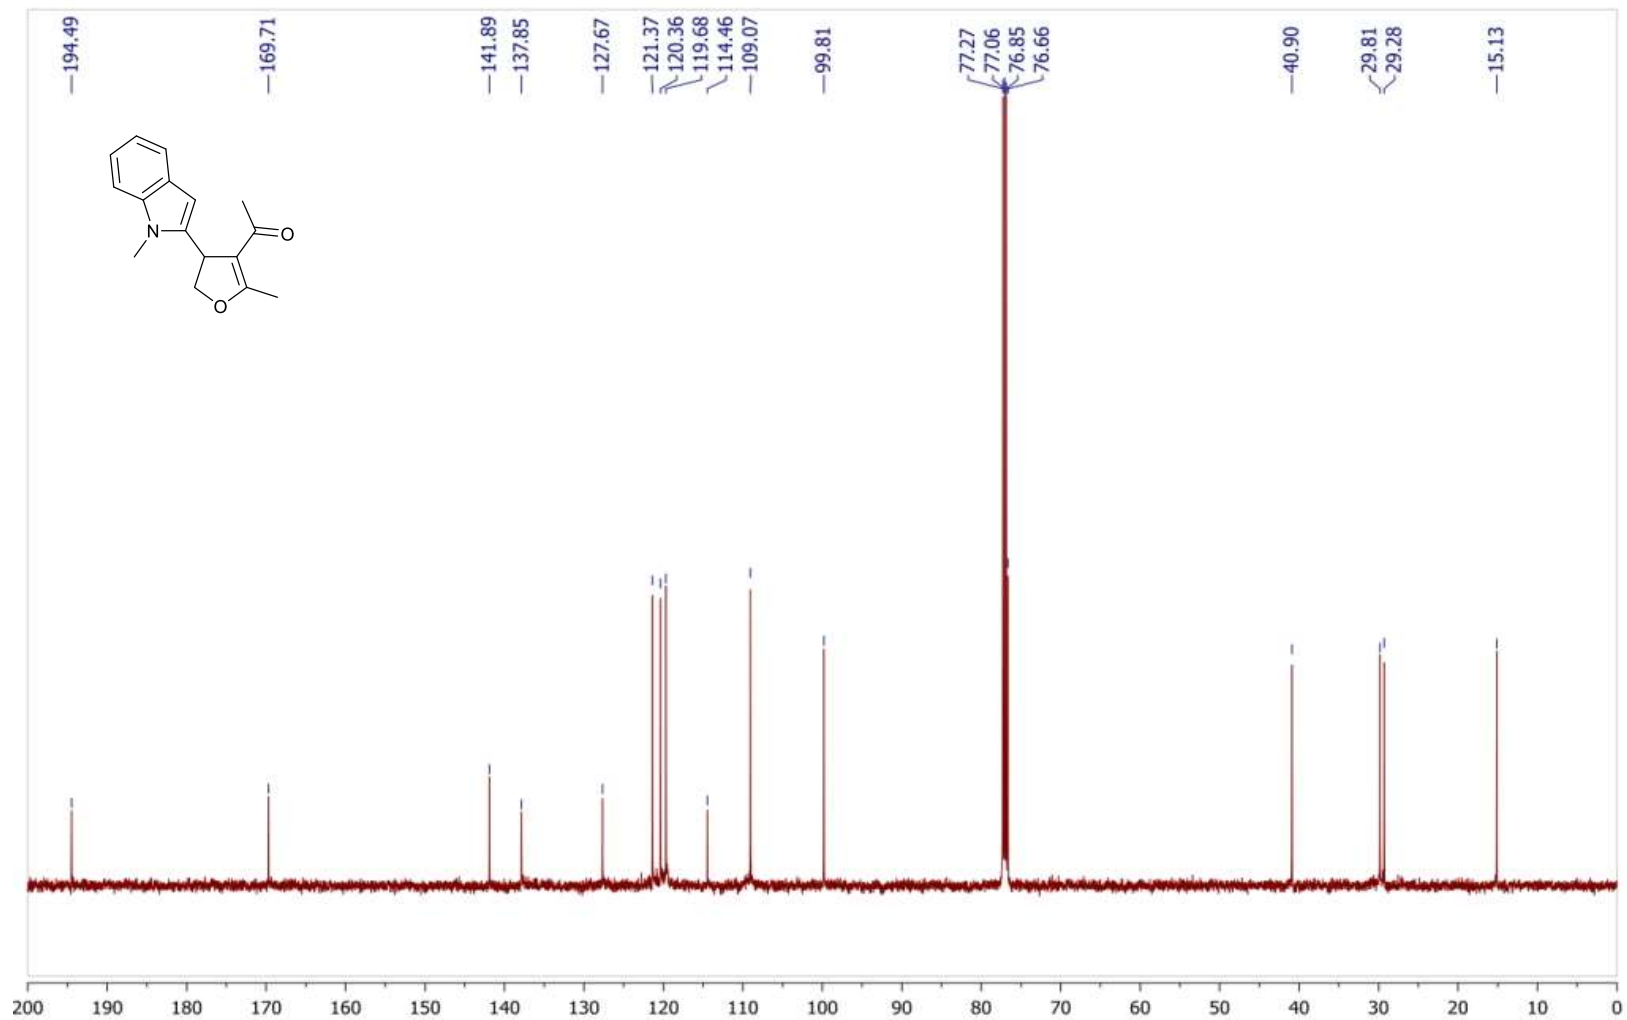

*(E)*-1-(2-Methyl-4-styryl-4,5-dihydrofuran-3-yl)ethan-1-one (*1h*)

<sup>1</sup>H NMR (CDCl<sub>3</sub>, 600 MHz)

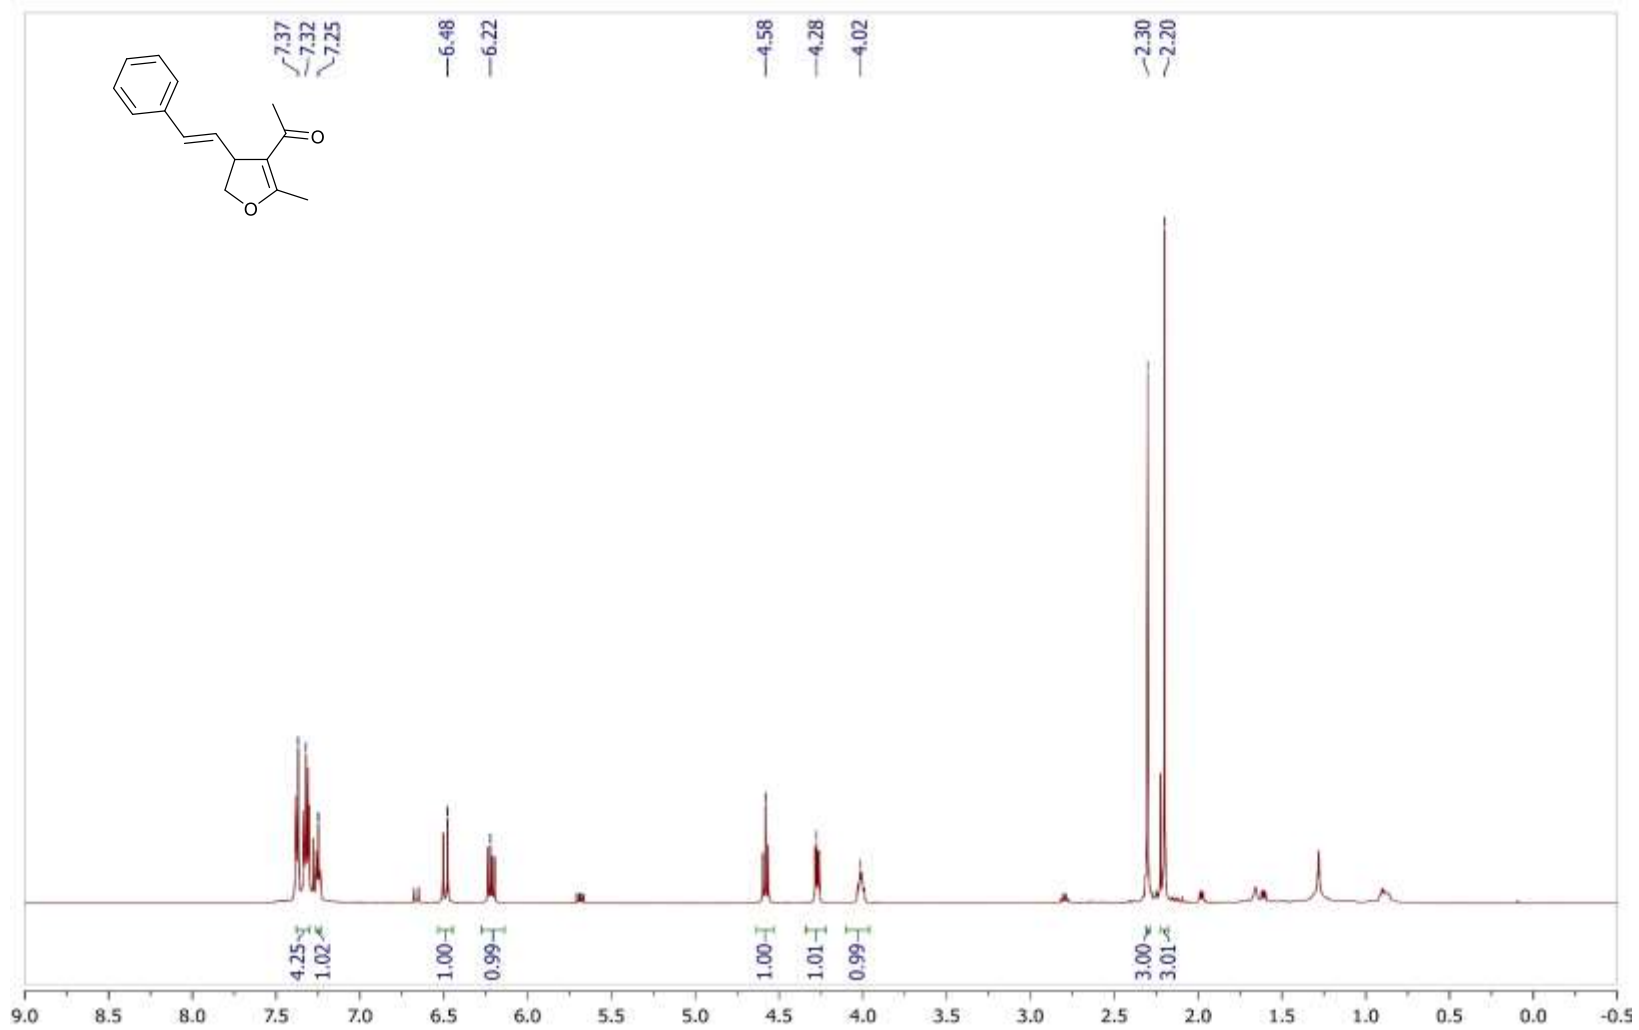

*(E)*-1-(2-Methyl-4-styryl-4,5-dihydrofuran-3-yl)ethan-1-one (*1h*)

$^{13}\text{C}$  NMR ( $\text{CDCl}_3$ , 150 MHz)

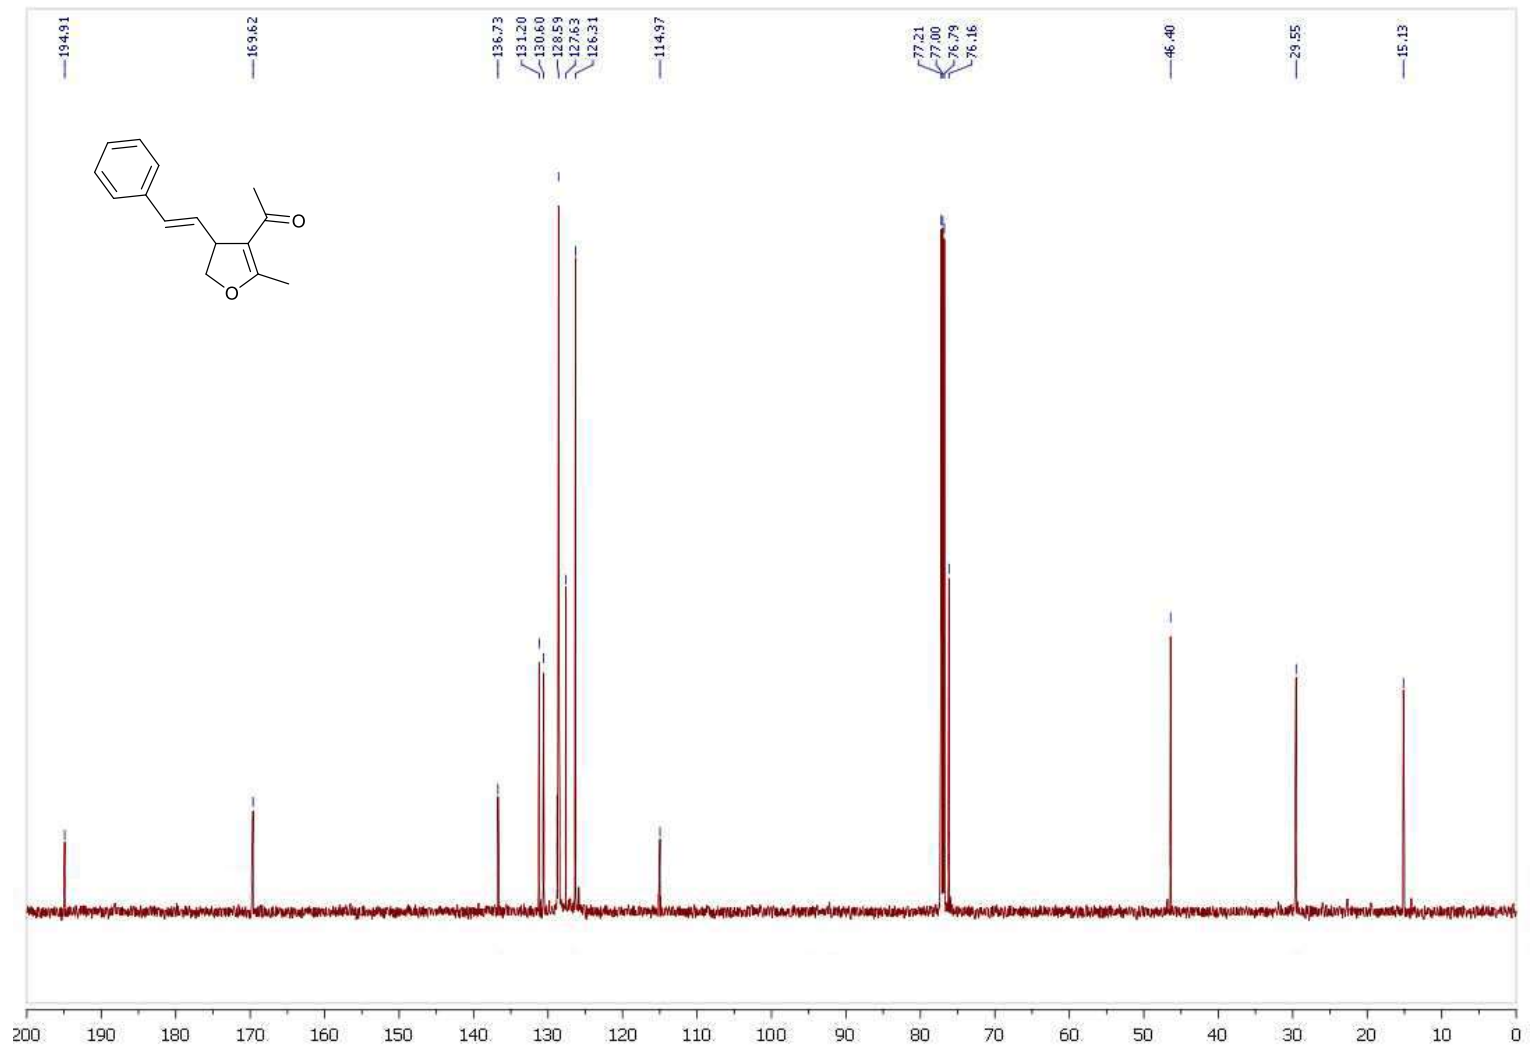

*2-(3,5-Dimethyl-1-phenyl-1H-pyrazol-4-yl)-2-phenylethanol (3a)*

$^1\text{H}$  NMR ( $\text{CDCl}_3$ , 600 MHz)

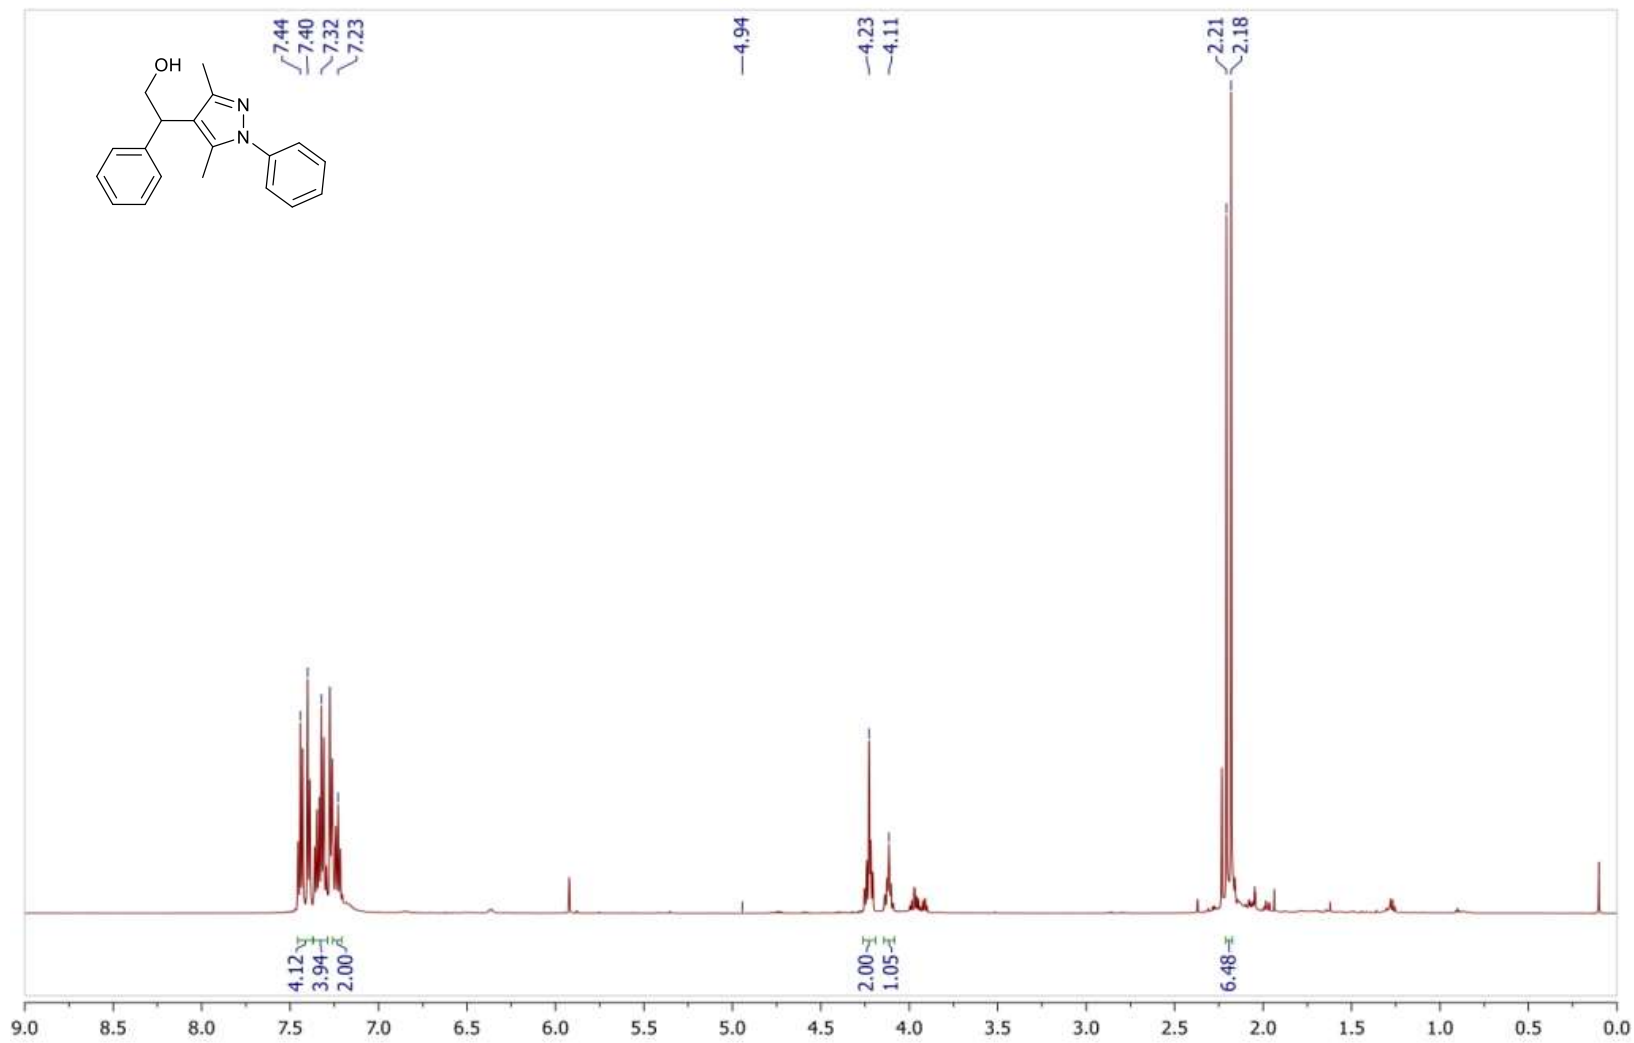



*2-(3,5-Dimethyl-1-phenyl-1H-pyrazol-4-yl)-2-phenylethanol (3a)*

$^{13}\text{C}$  NMR ( $\text{CDCl}_3$ , 150 MHz)

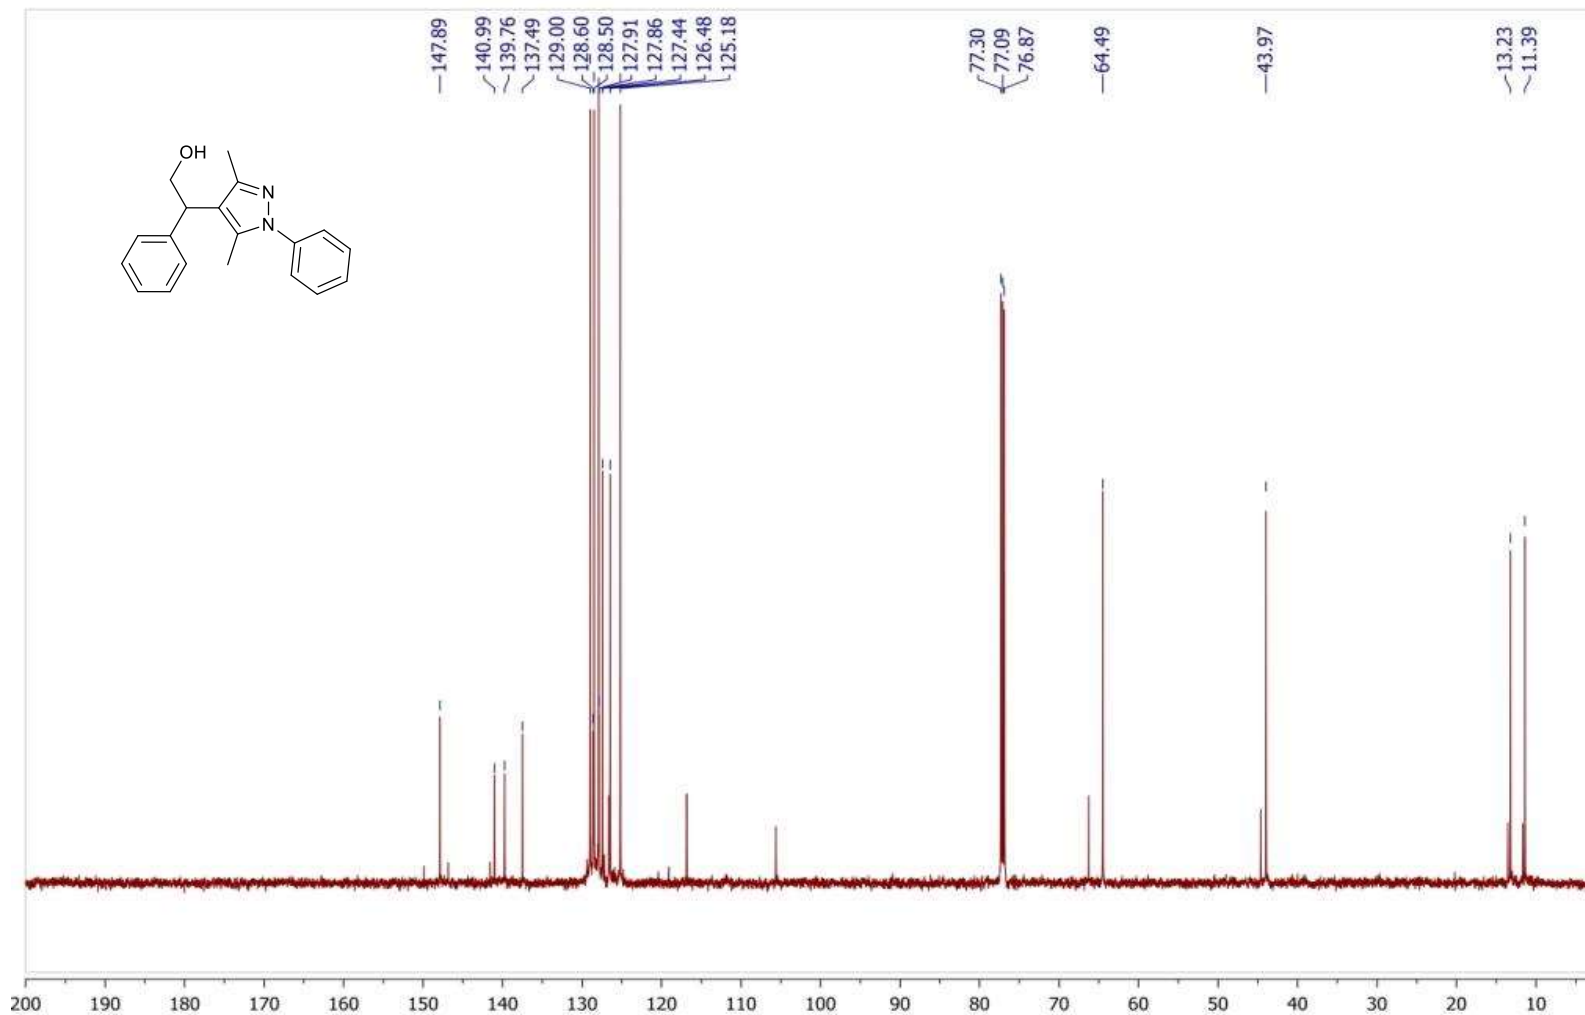

*2-[1-(4-Chlorophenyl)-3,5-dimethyl-1H-pyrazol-4-yl]-2-phenylethanol (3b)*

<sup>1</sup>H NMR (CDCl<sub>3</sub>, 600 MHz)

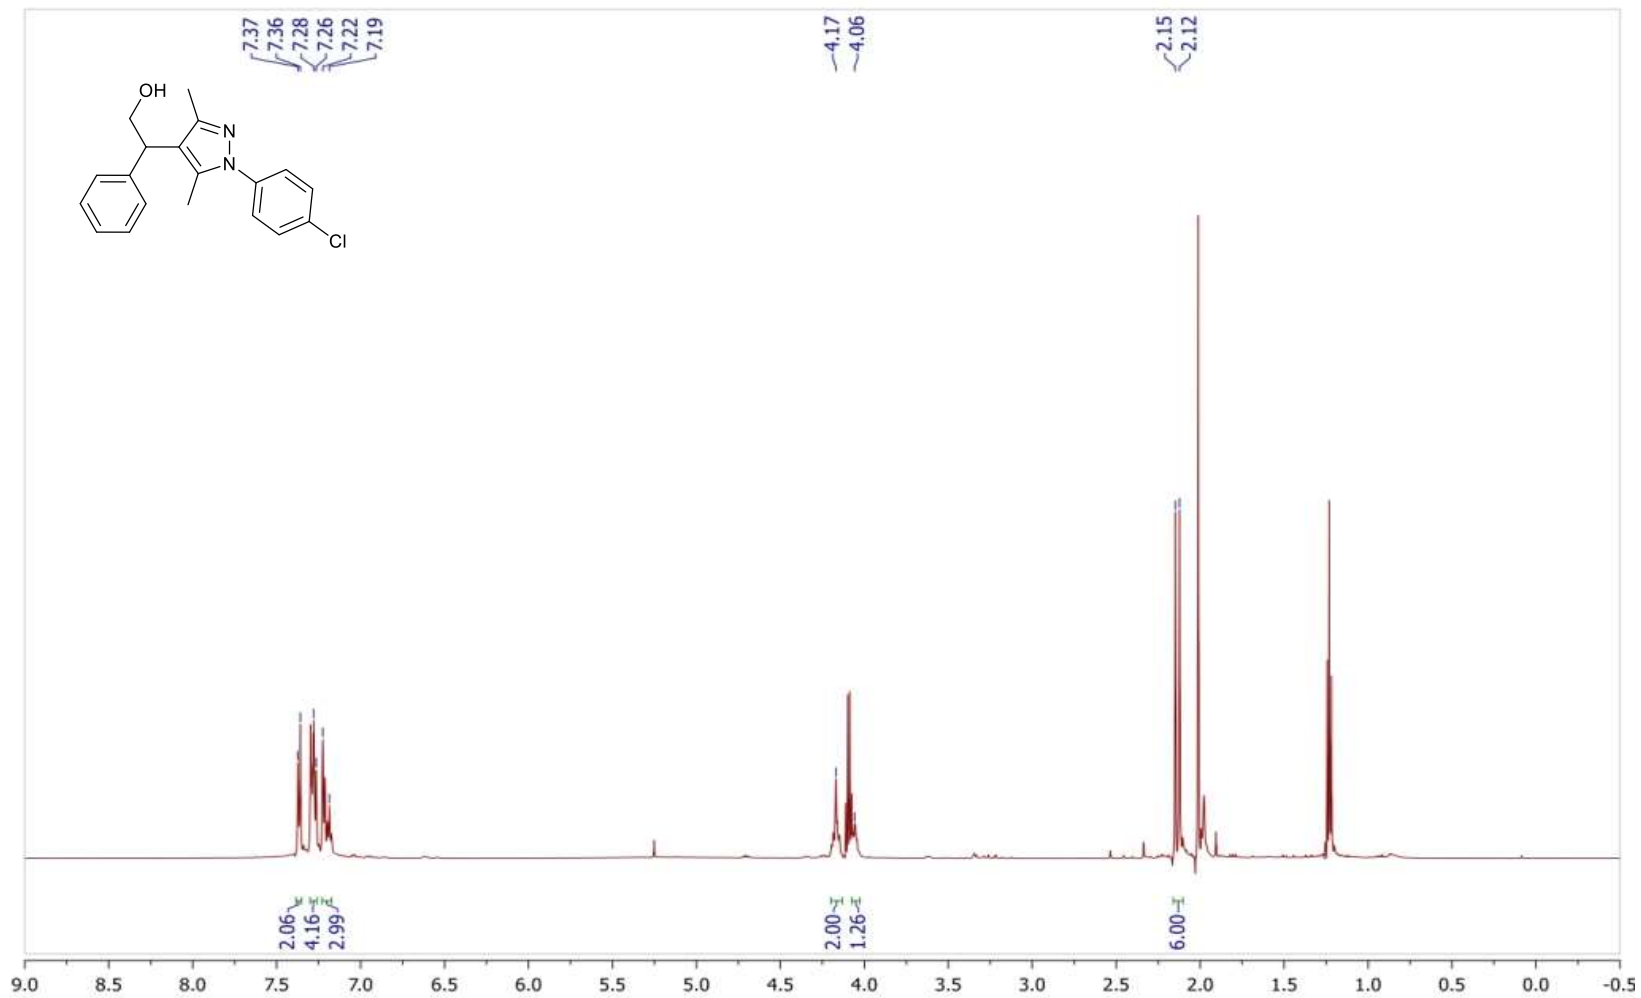

*2-[1-(4-Chlorophenyl)-3,5-dimethyl-1H-pyrazol-4-yl]-2-phenylethanol (3b)*

$^{13}\text{C}$  NMR ( $\text{CDCl}_3$ , 150 MHz)

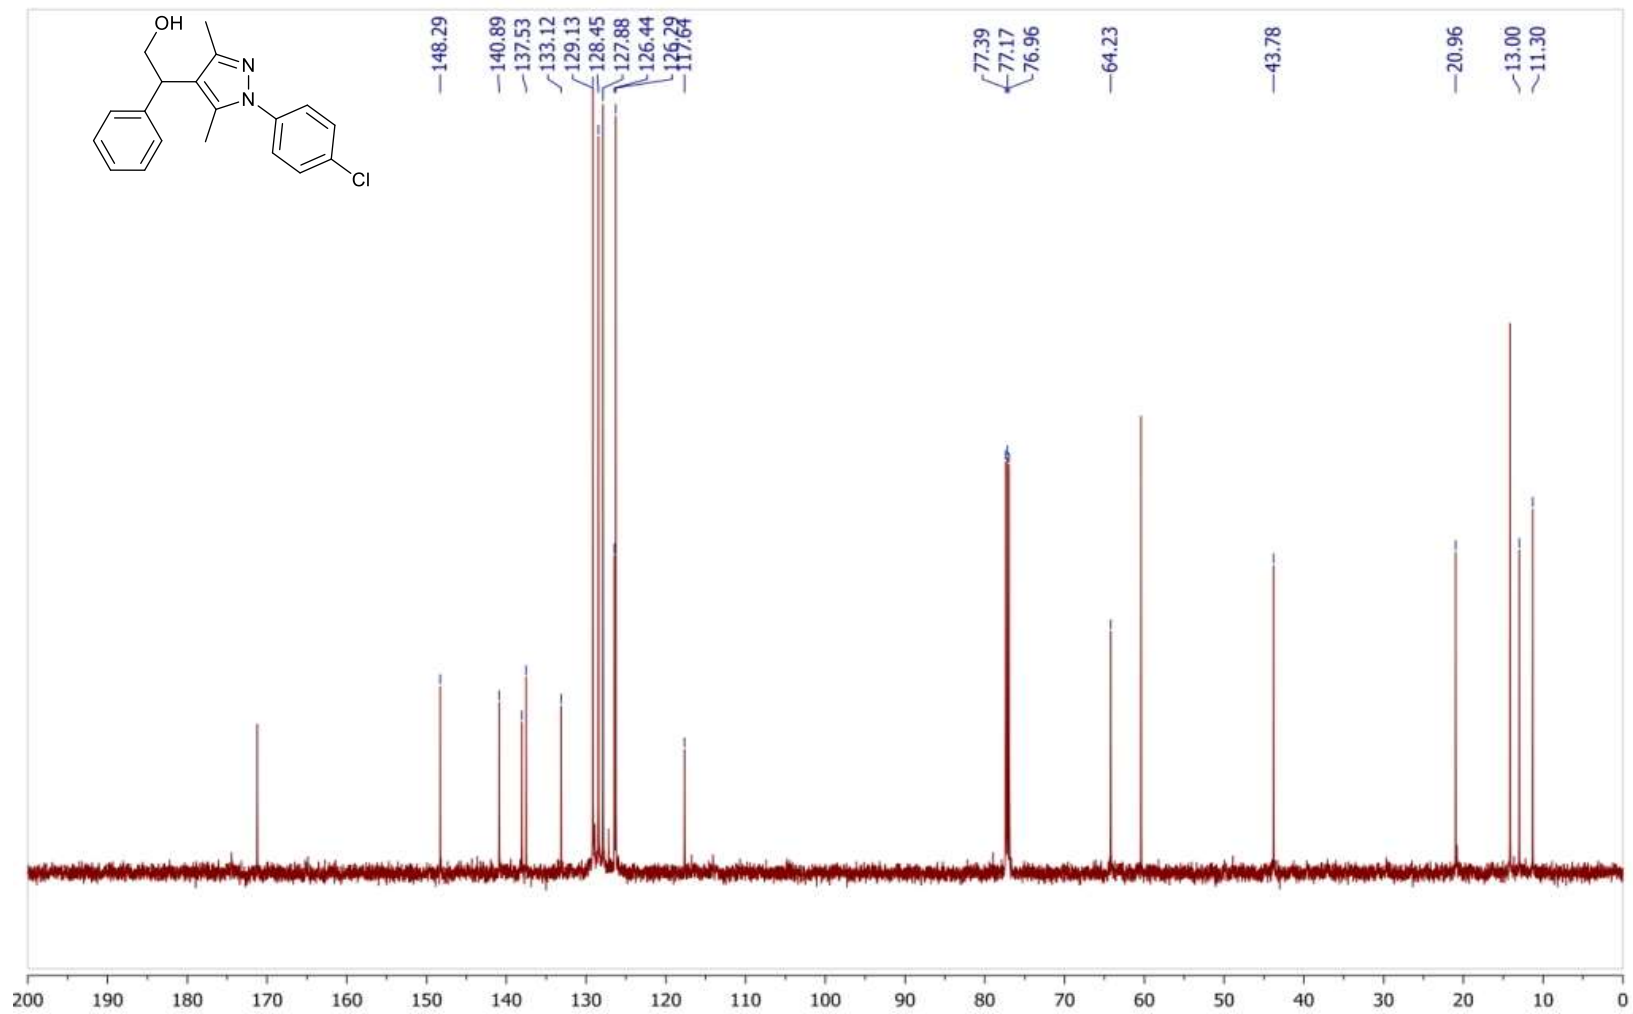

*2-[3,5-Dimethyl-1-(4-methylphenyl)-1H-pyrazol-4-yl]-2-phenylethanol (3c)*

<sup>1</sup>H NMR (CDCl<sub>3</sub>, 600 MHz)

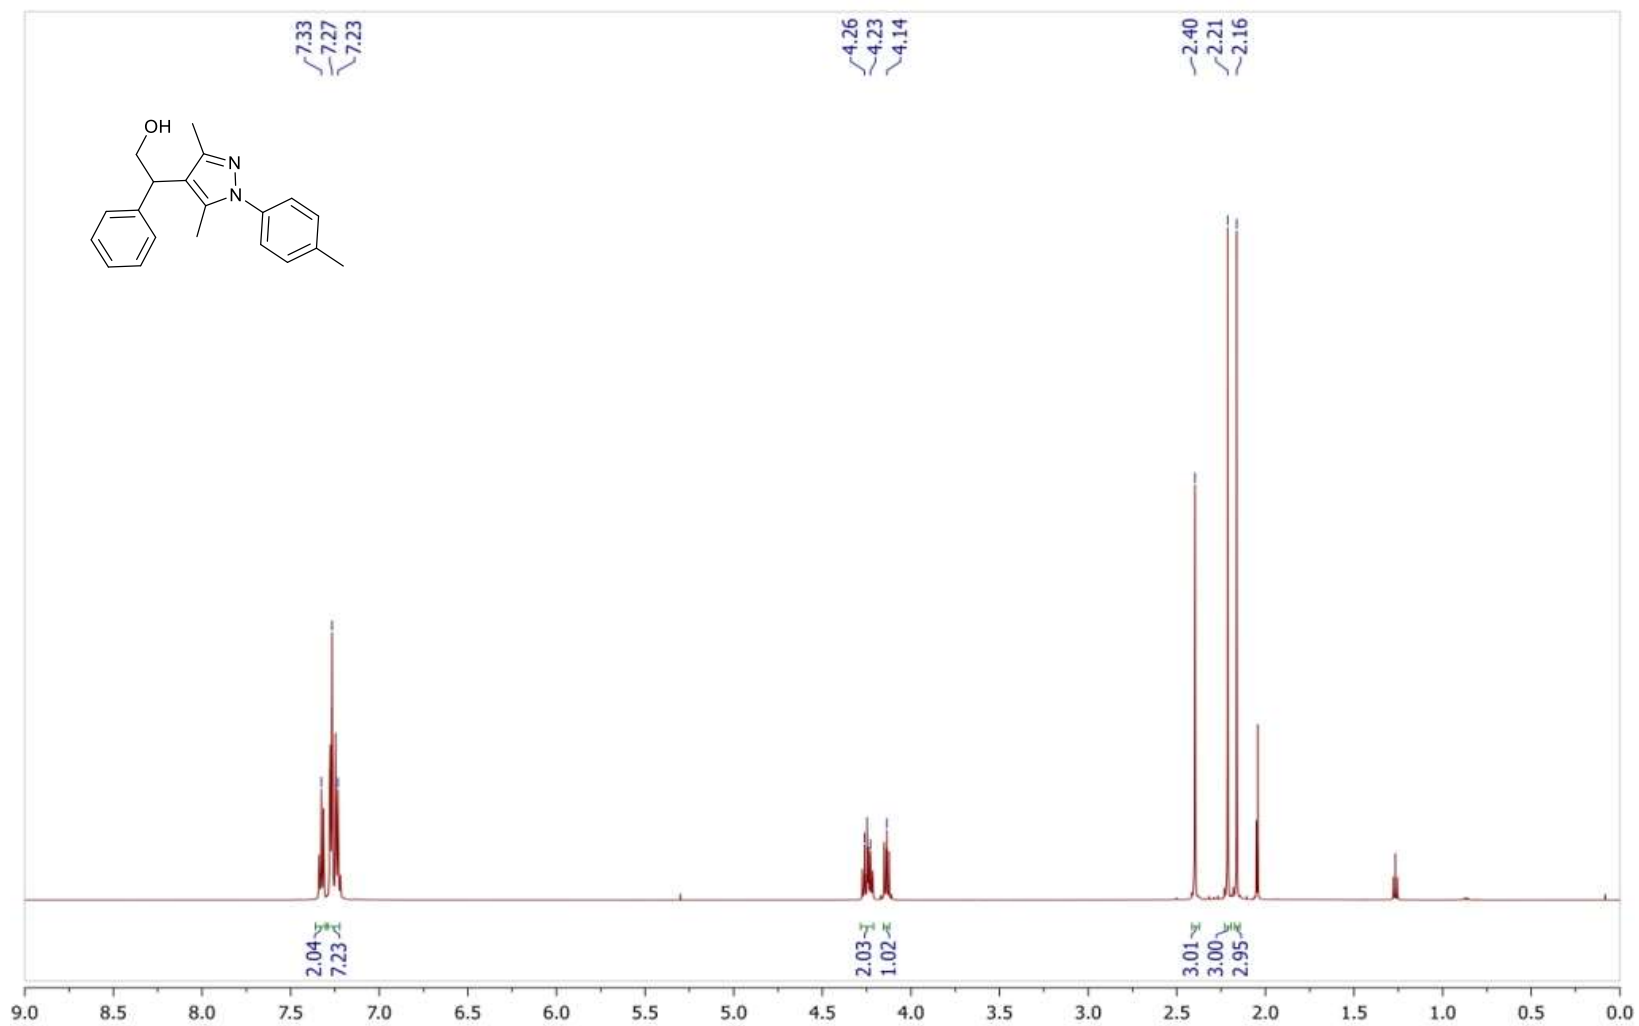

*2-[3,5-Dimethyl-1-(4-methylphenyl)-1H-pyrazol-4-yl]-2-phenylethanol (3c)*

$^{13}\text{C}$  NMR ( $\text{CDCl}_3$ , 150 MHz)

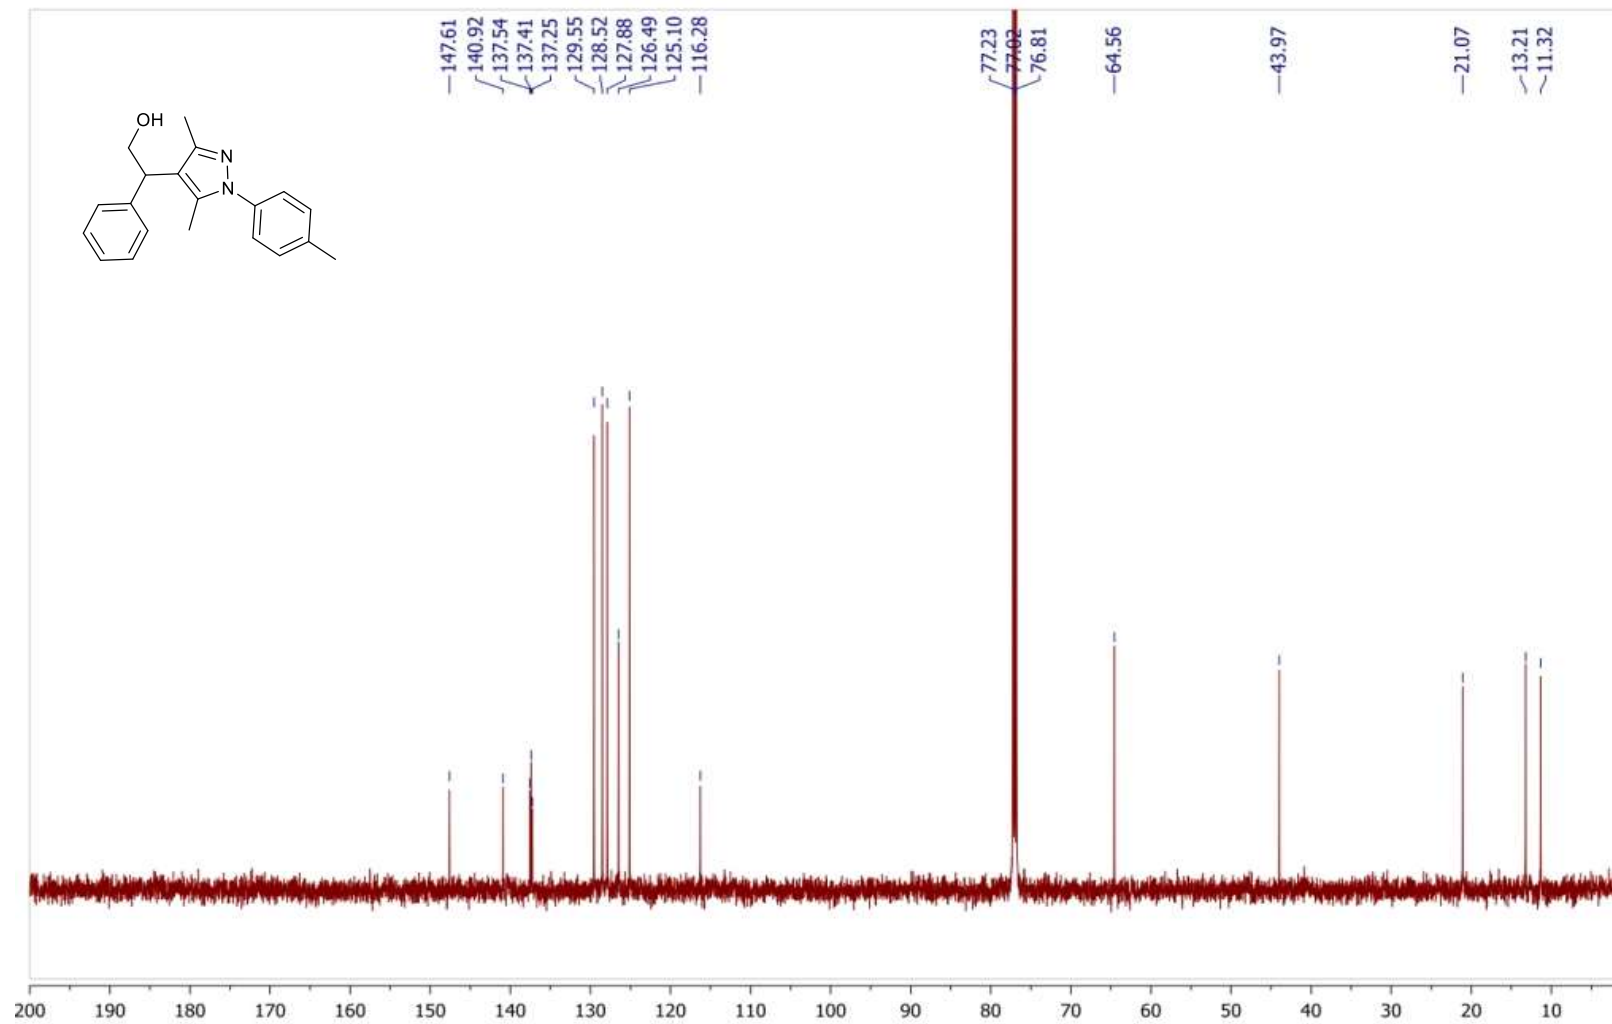

*2-Phenyl-2-(1,3,5-trimethyl-1H-pyrazol-4-yl)ethanol (3d)*

<sup>1</sup>H NMR (CDCl<sub>3</sub>, 600 MHz)

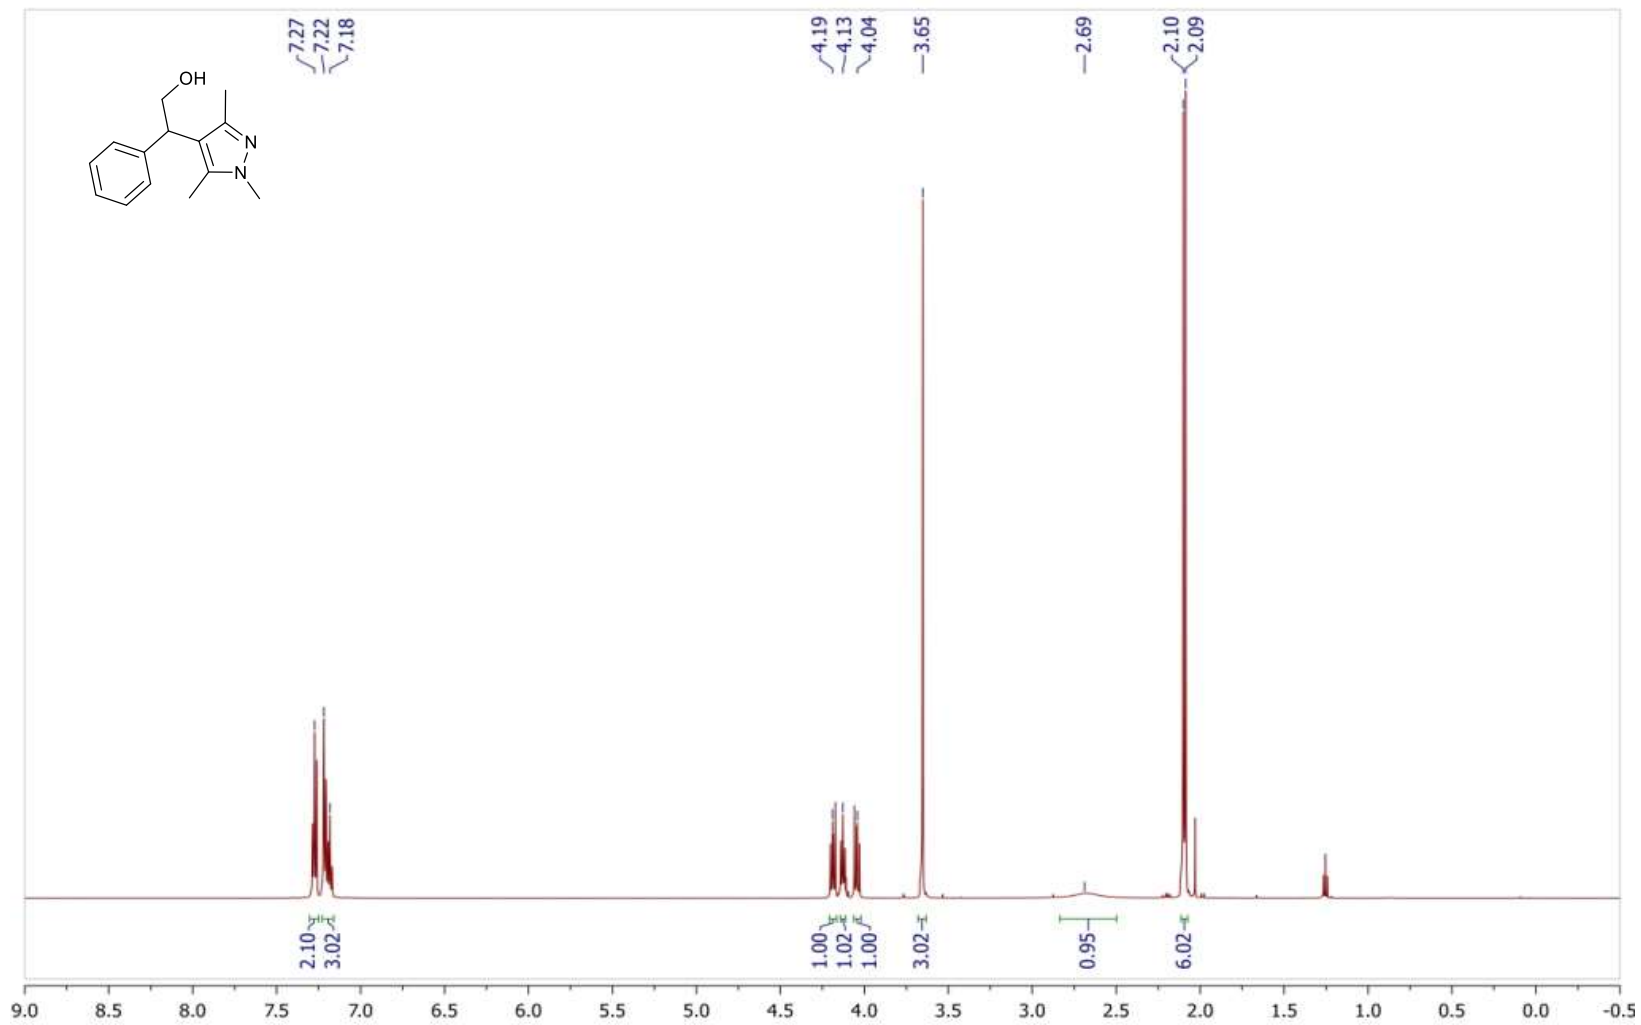

*2-Phenyl-2-(1,3,5-trimethyl-1H-pyrazol-4-yl)ethanol (3d)*

$^{13}\text{C}$  NMR ( $\text{CDCl}_3$ , 150 MHz)

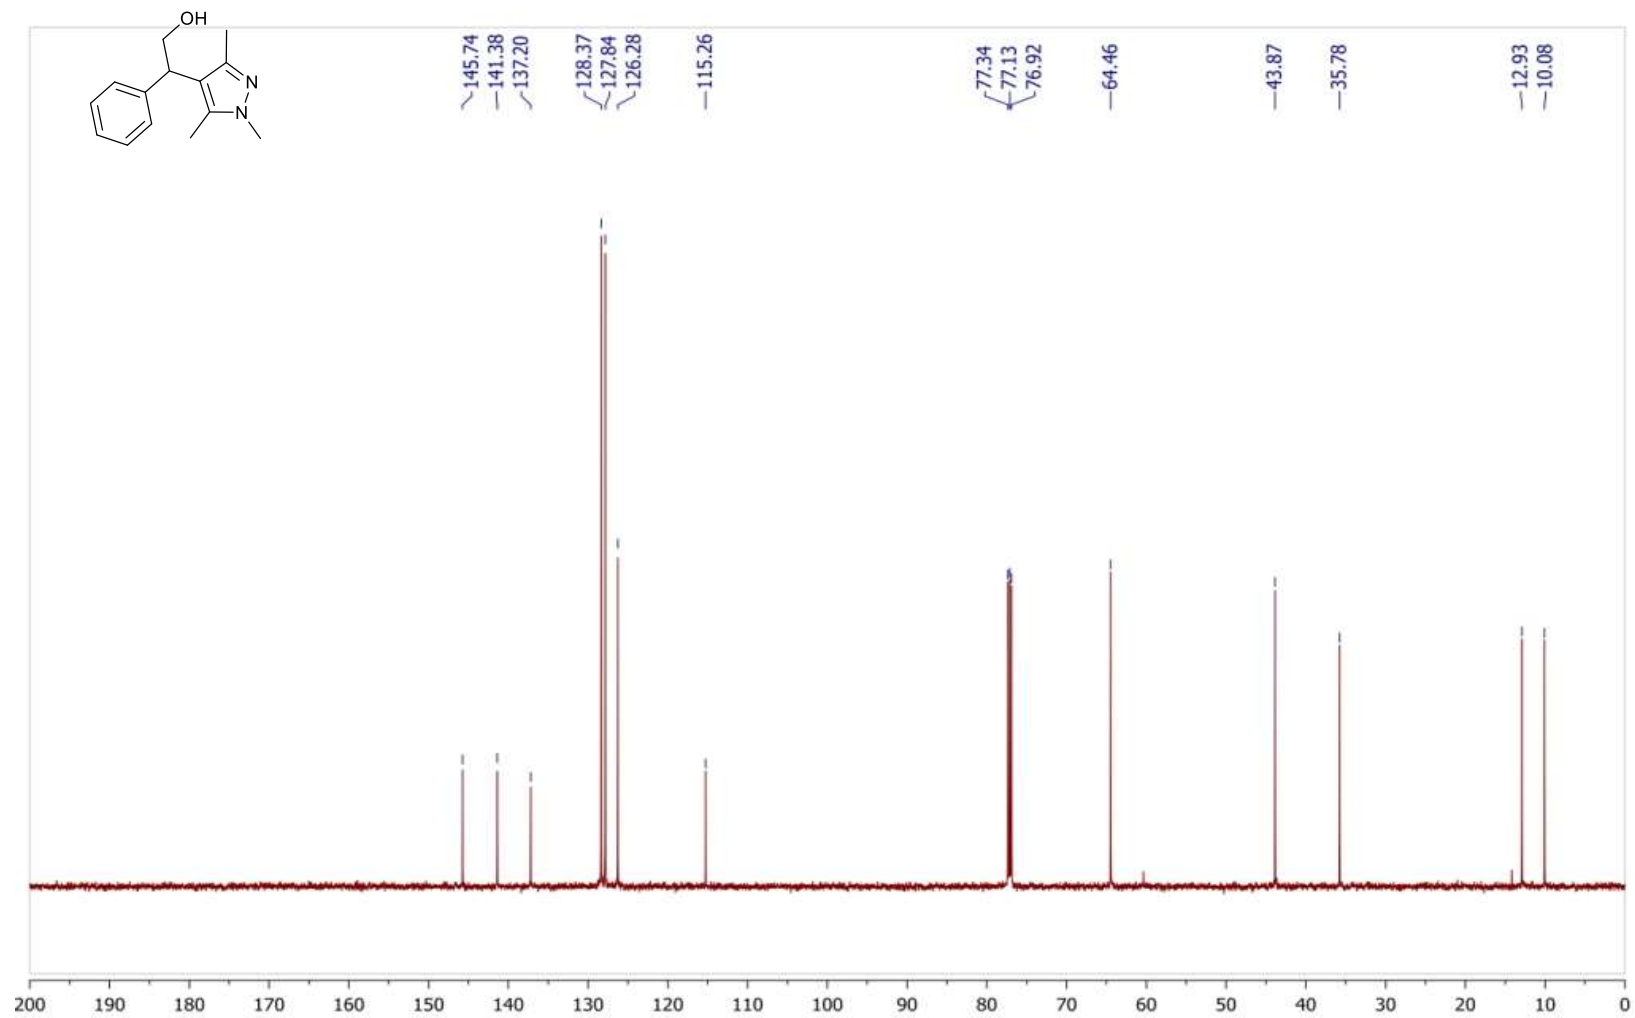

2-[1-(*tert*-Butyl)-3,5-dimethyl-1*H*-pyrazol-4-yl]-2-phenylethanol (**3e**)

$^1\text{H}$  NMR ( $\text{CDCl}_3$ , 600 MHz)

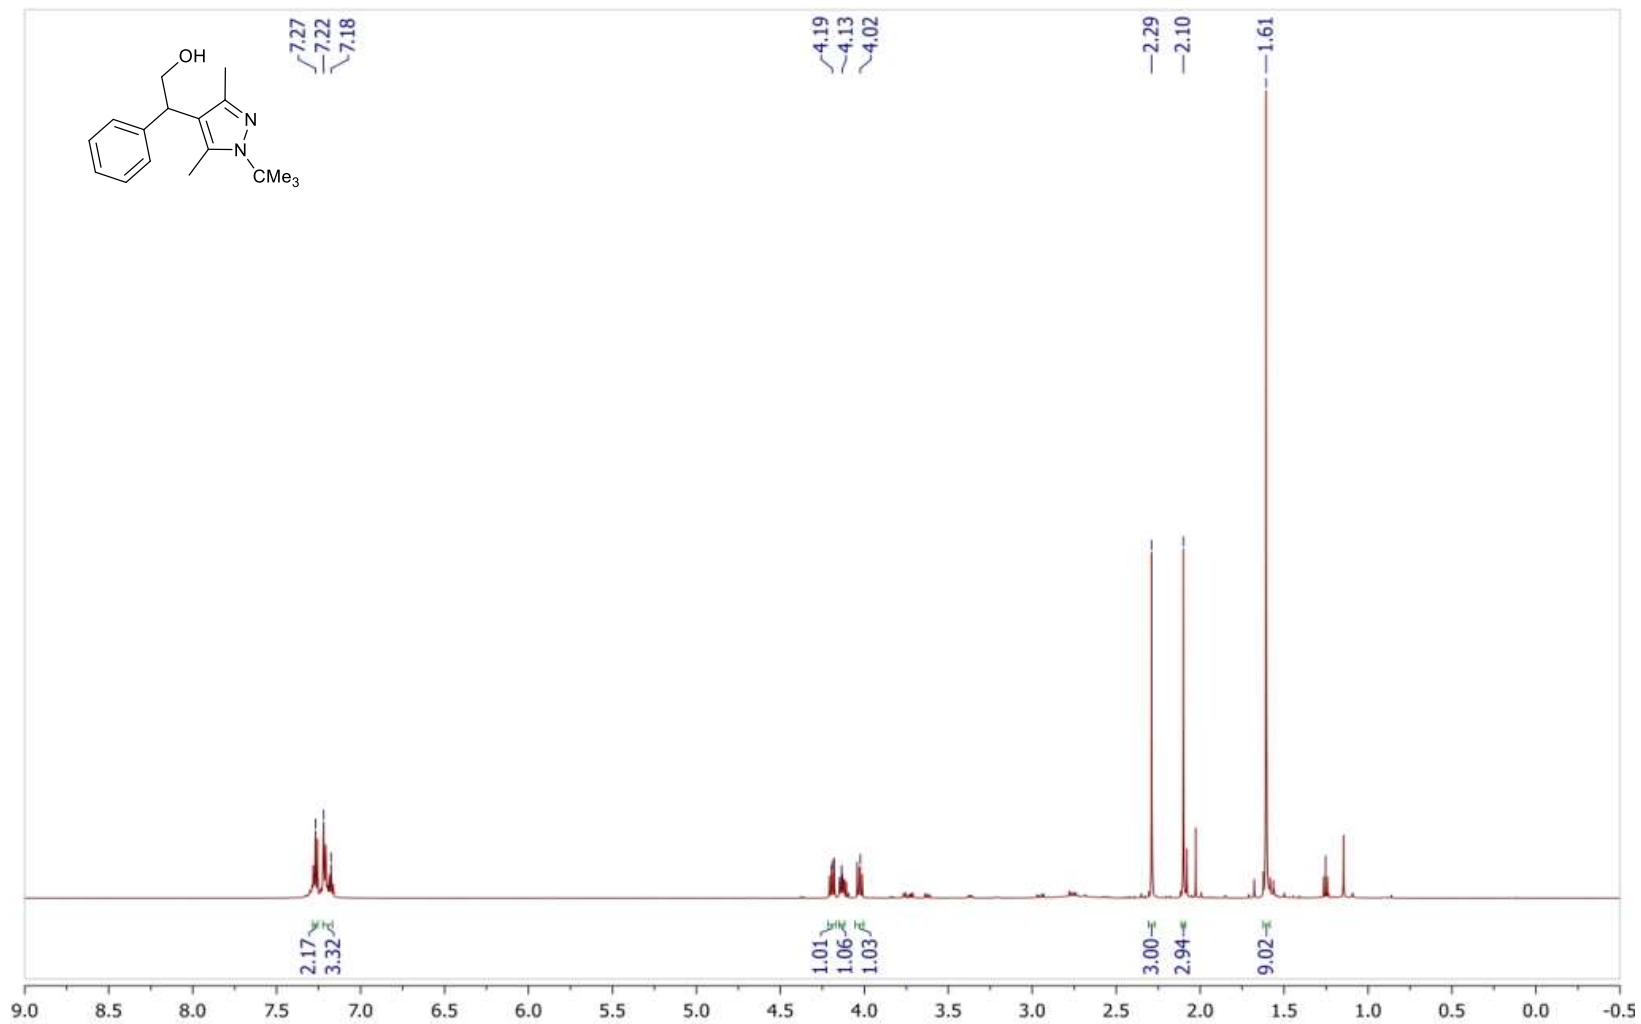



*2-[1-(tert-Butyl)-3,5-dimethyl-1H-pyrazol-4-yl]-2-phenylethanol (3e)*

$^{13}\text{C}$  NMR ( $\text{CDCl}_3$ , 150 MHz)

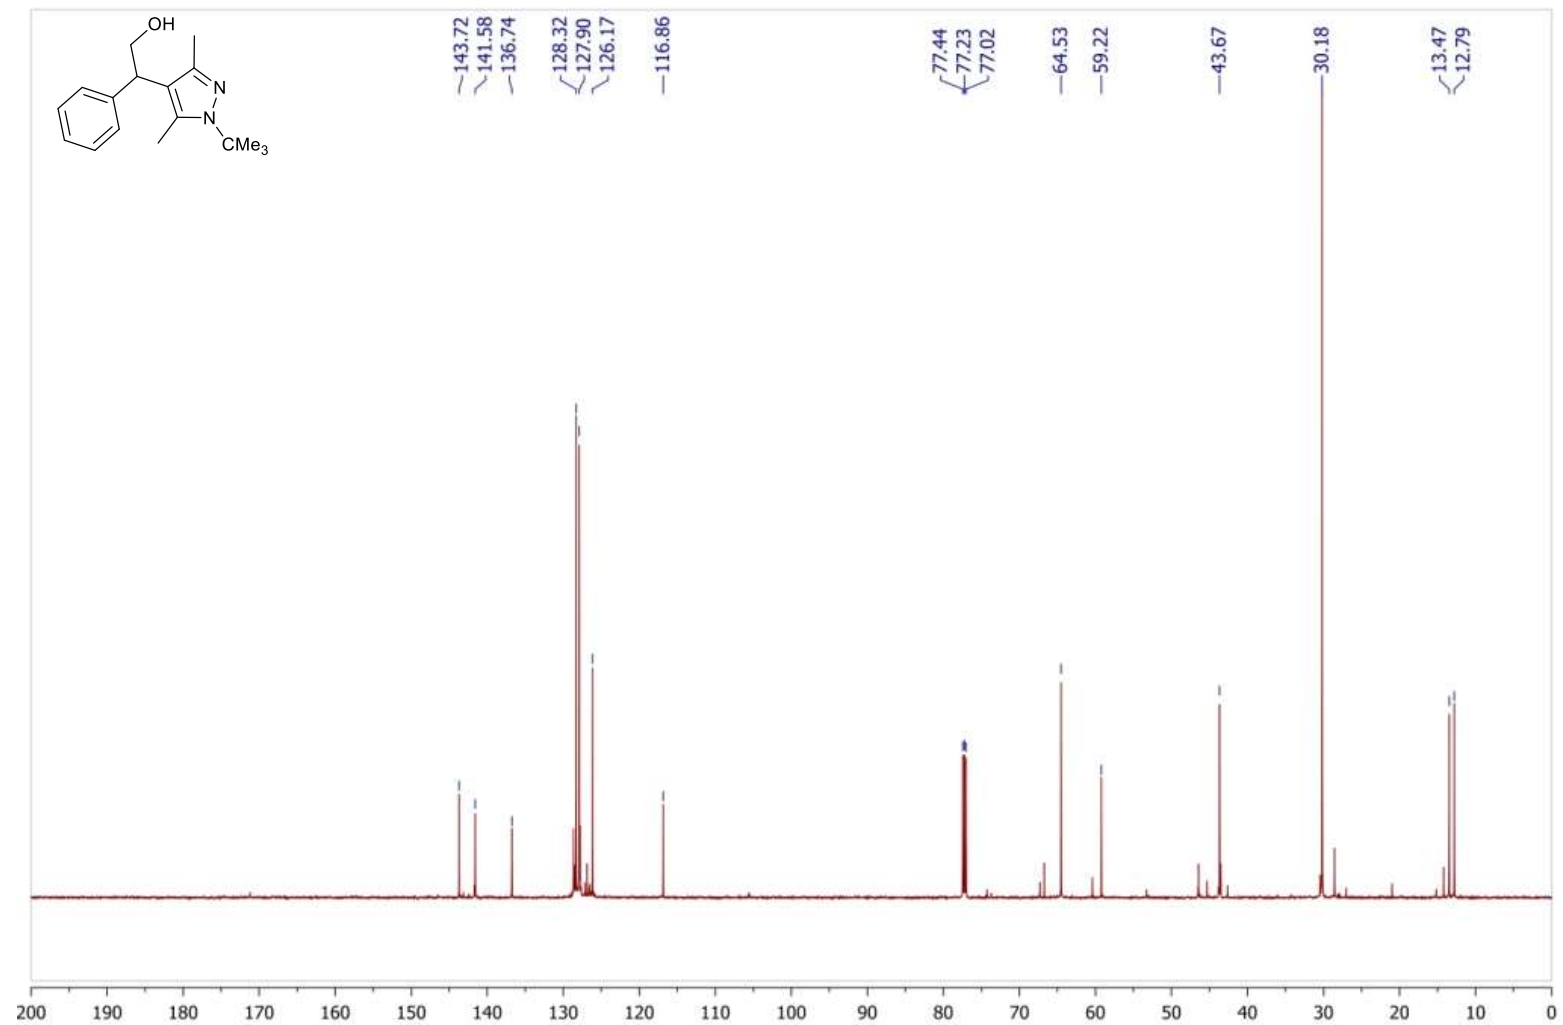

*2-(3,5-Dimethyl-1H-pyrazol-4-yl)-2-phenylethanol (3f)*

<sup>1</sup>H NMR (CDCl<sub>3</sub>, 600 MHz)

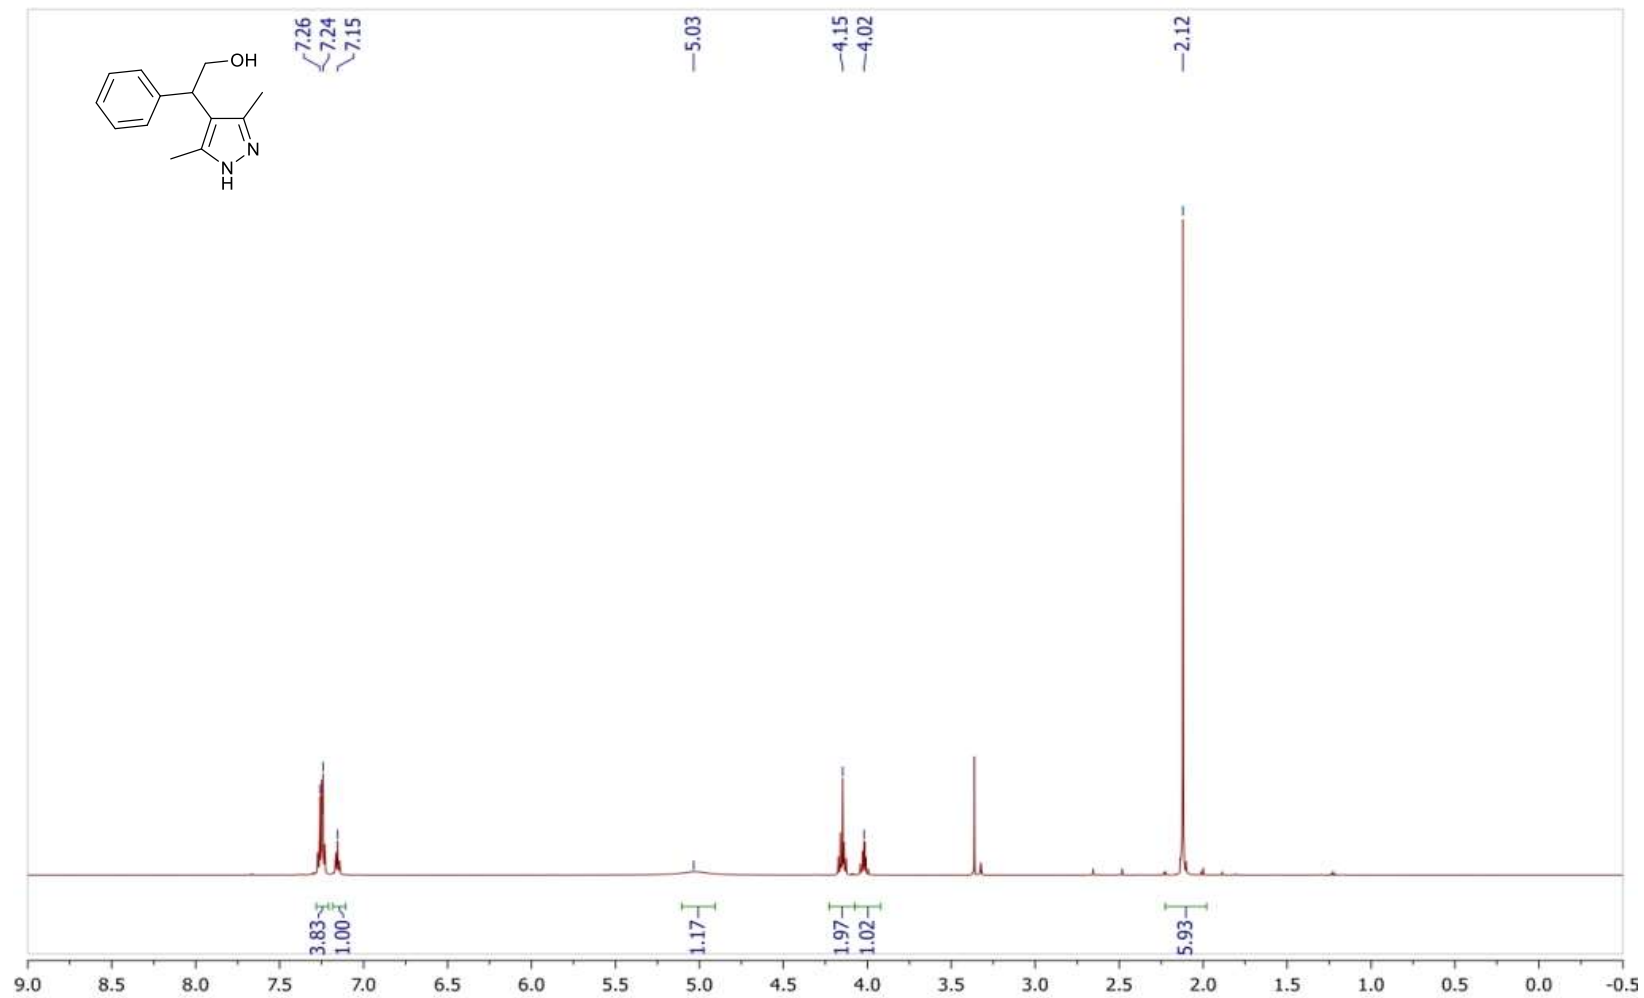

*2-(3,5-Dimethyl-1H-pyrazol-4-yl)-2-phenylethanol (3f)*

$^{13}\text{C}$  NMR ( $\text{CDCl}_3$ , 150 MHz)

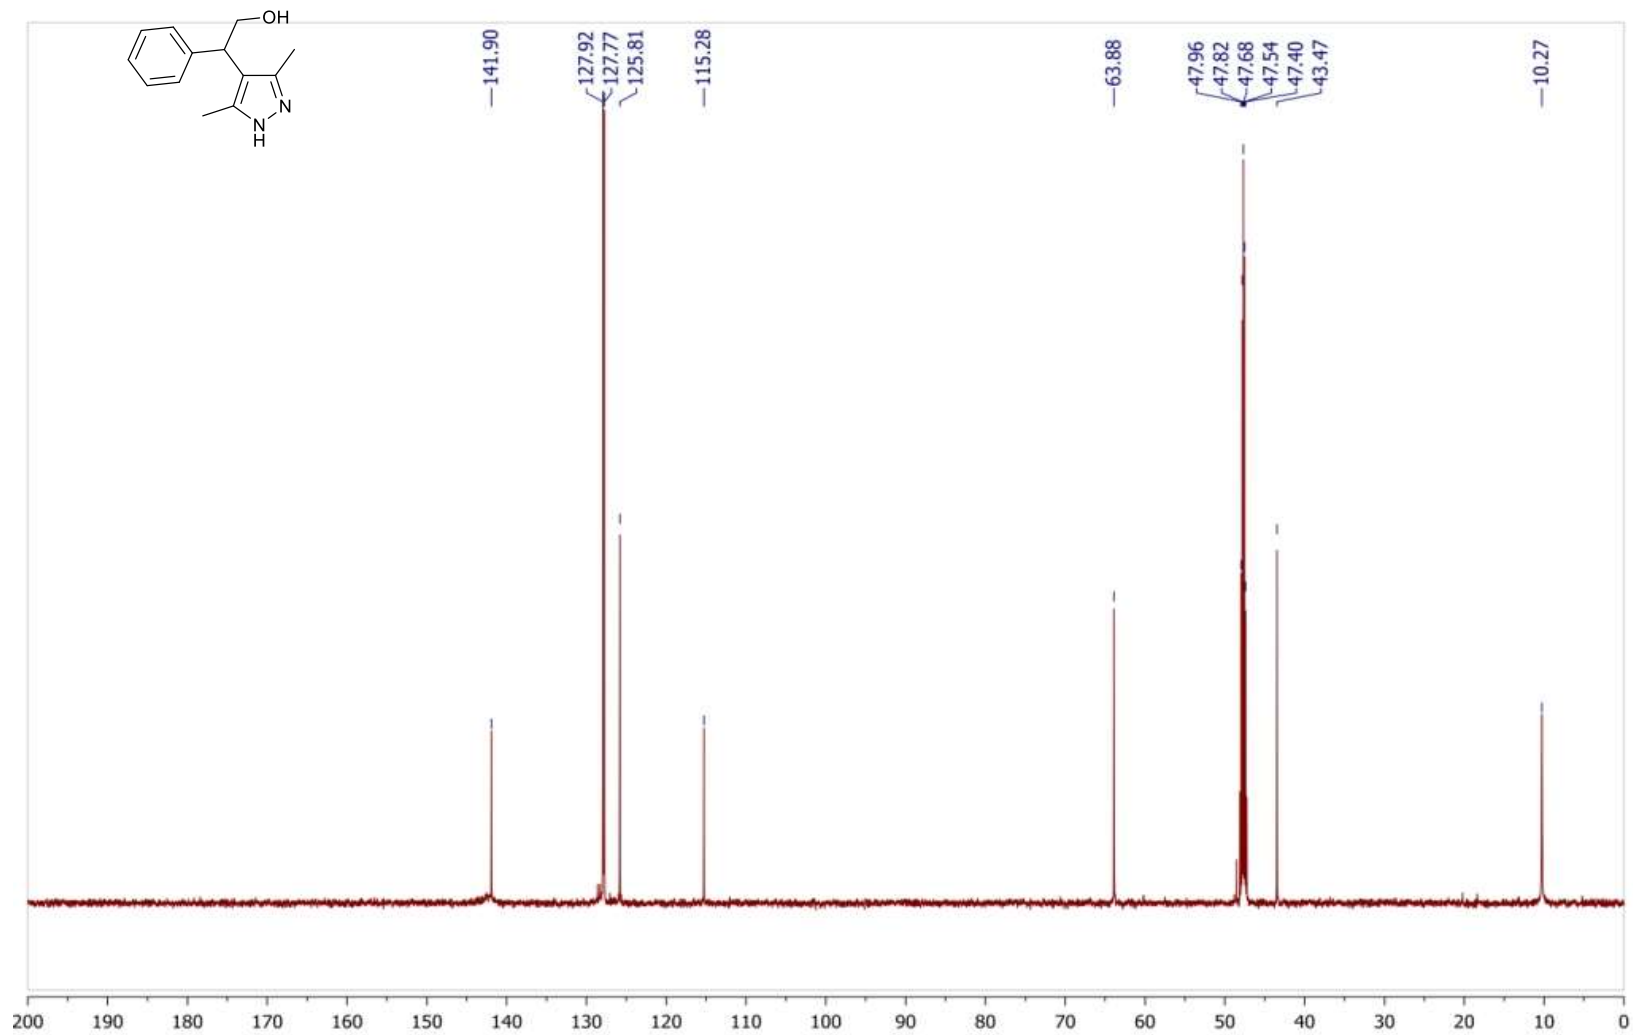

*2-[3,5-Dimethyl-1-(4-nitrophenyl)-1H-pyrazol-4-yl]-2-phenylethanol (3g)*

<sup>1</sup>H NMR (CDCl<sub>3</sub>, 600 MHz)

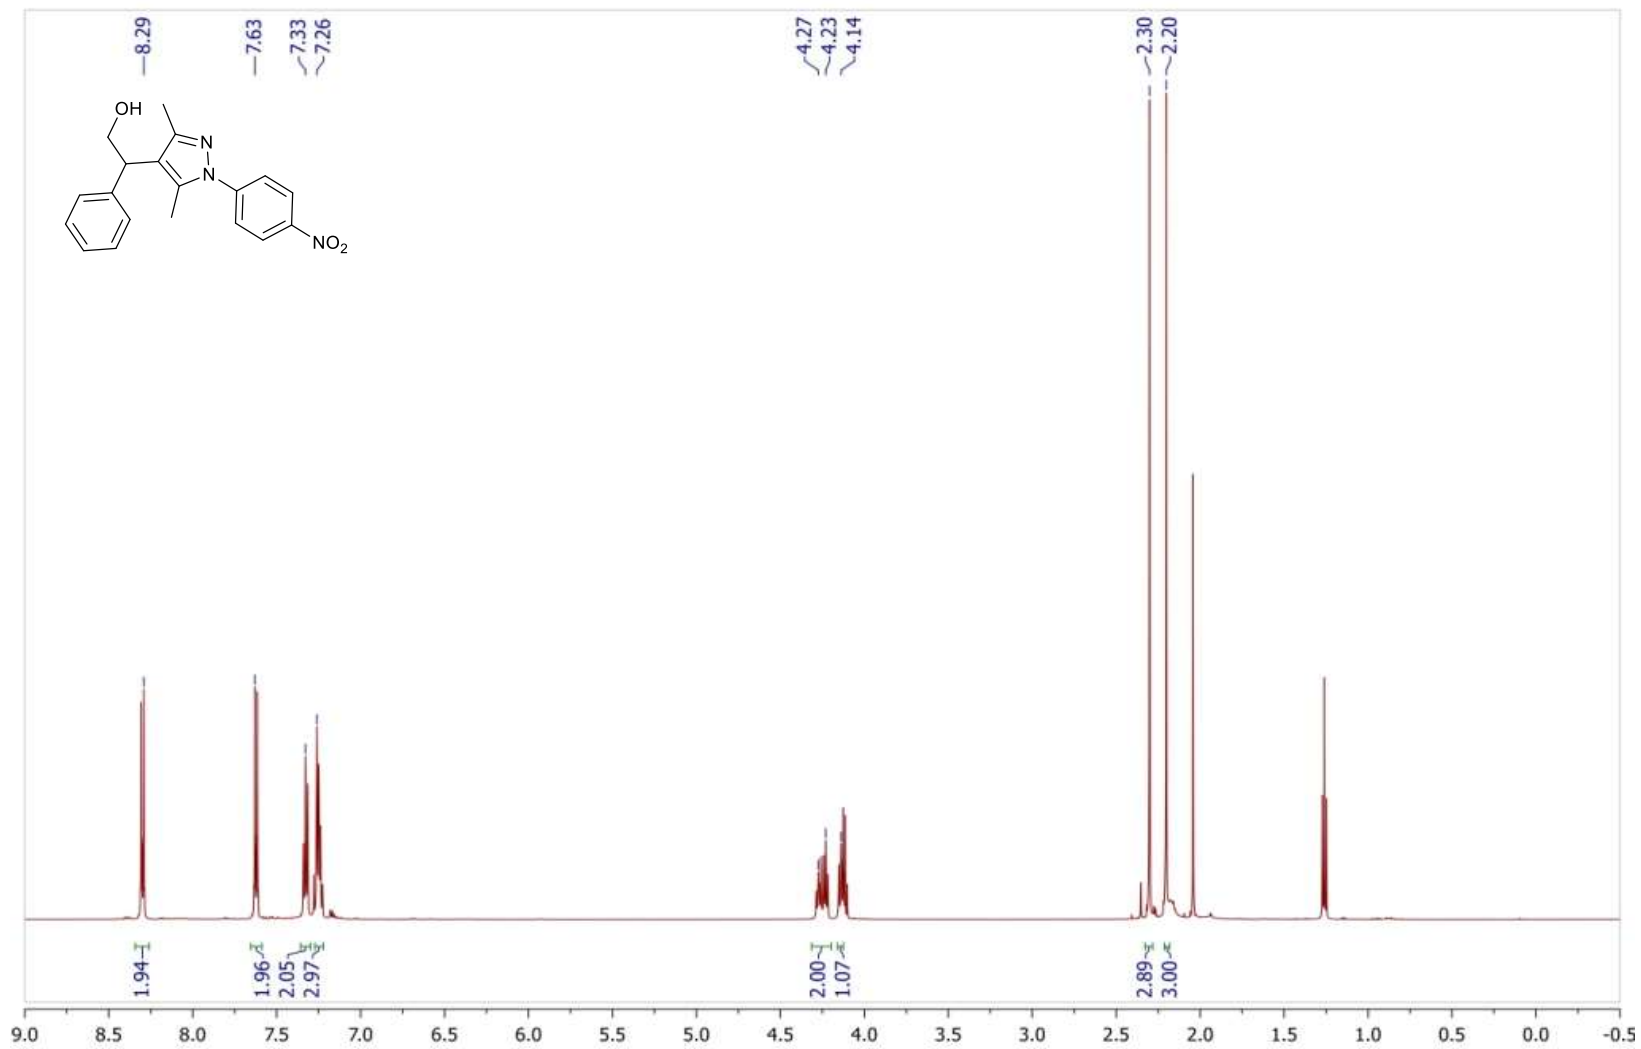

*2-[3,5-Dimethyl-1-(4-nitrophenyl)-1H-pyrazol-4-yl]-2-phenylethanol (3g)*

$^{13}\text{C}$  NMR ( $\text{CDCl}_3$ , 150 MHz)

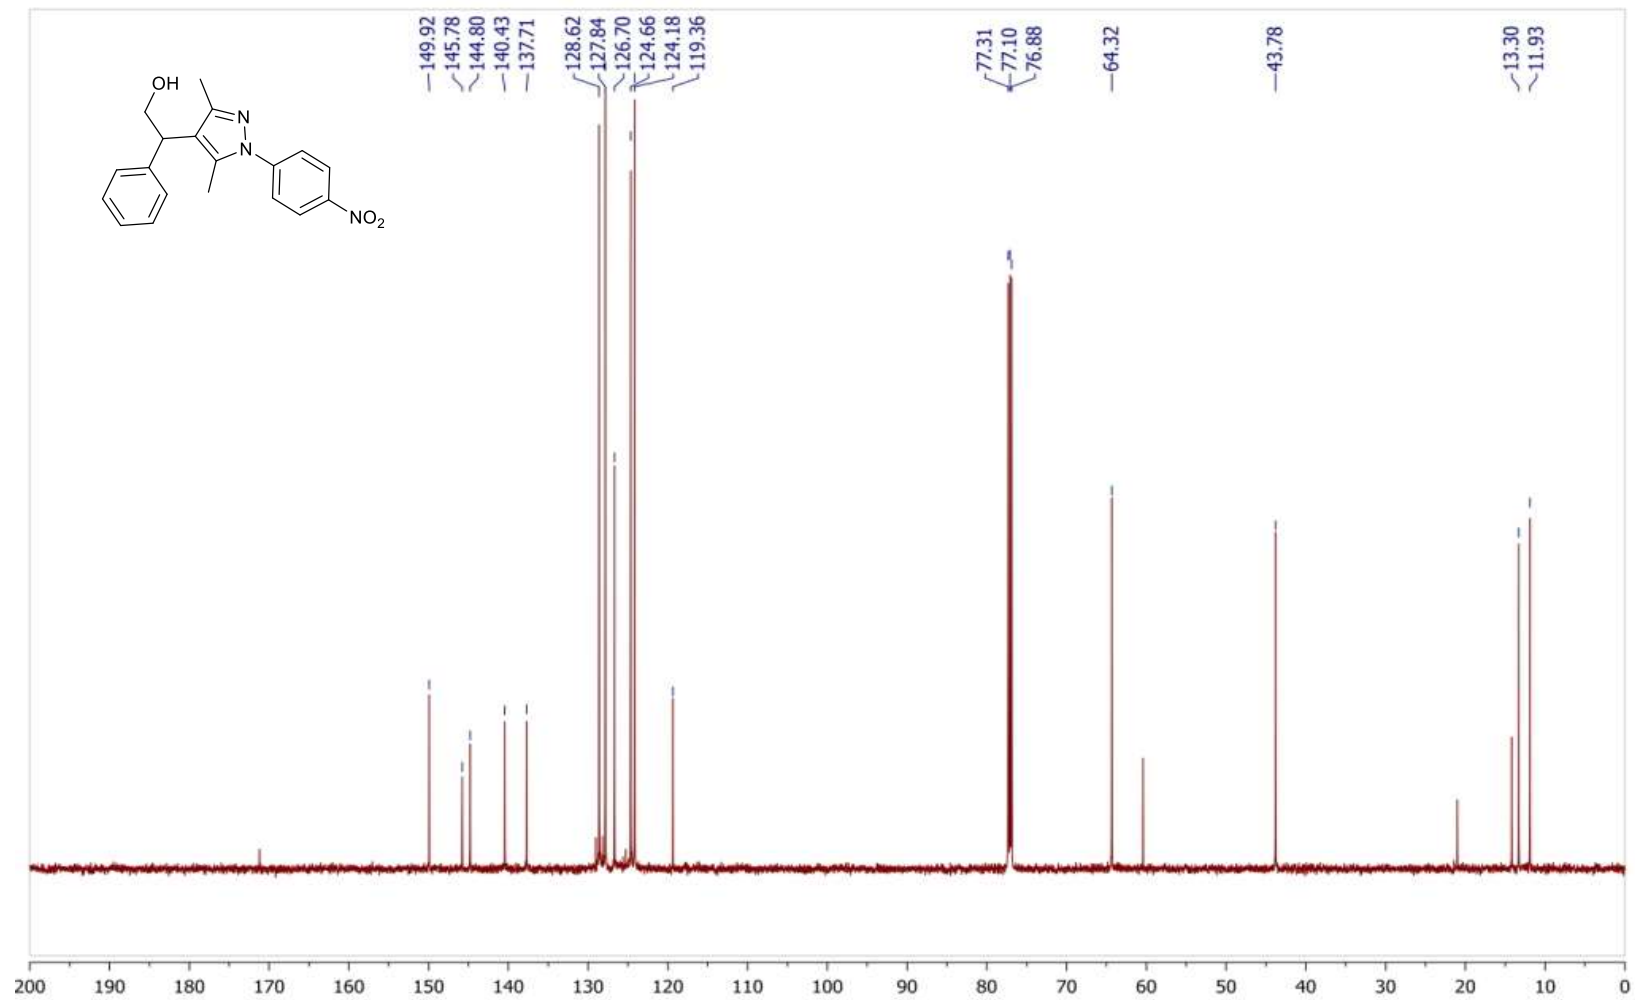

*2-[3,5-Dimethyl-1-(4-methylphenyl)-1H-pyrazol-4-yl]-2-[4-(dimethylamino)phenyl]ethanol (3h)*

<sup>1</sup>H NMR (CDCl<sub>3</sub>, 600 MHz)

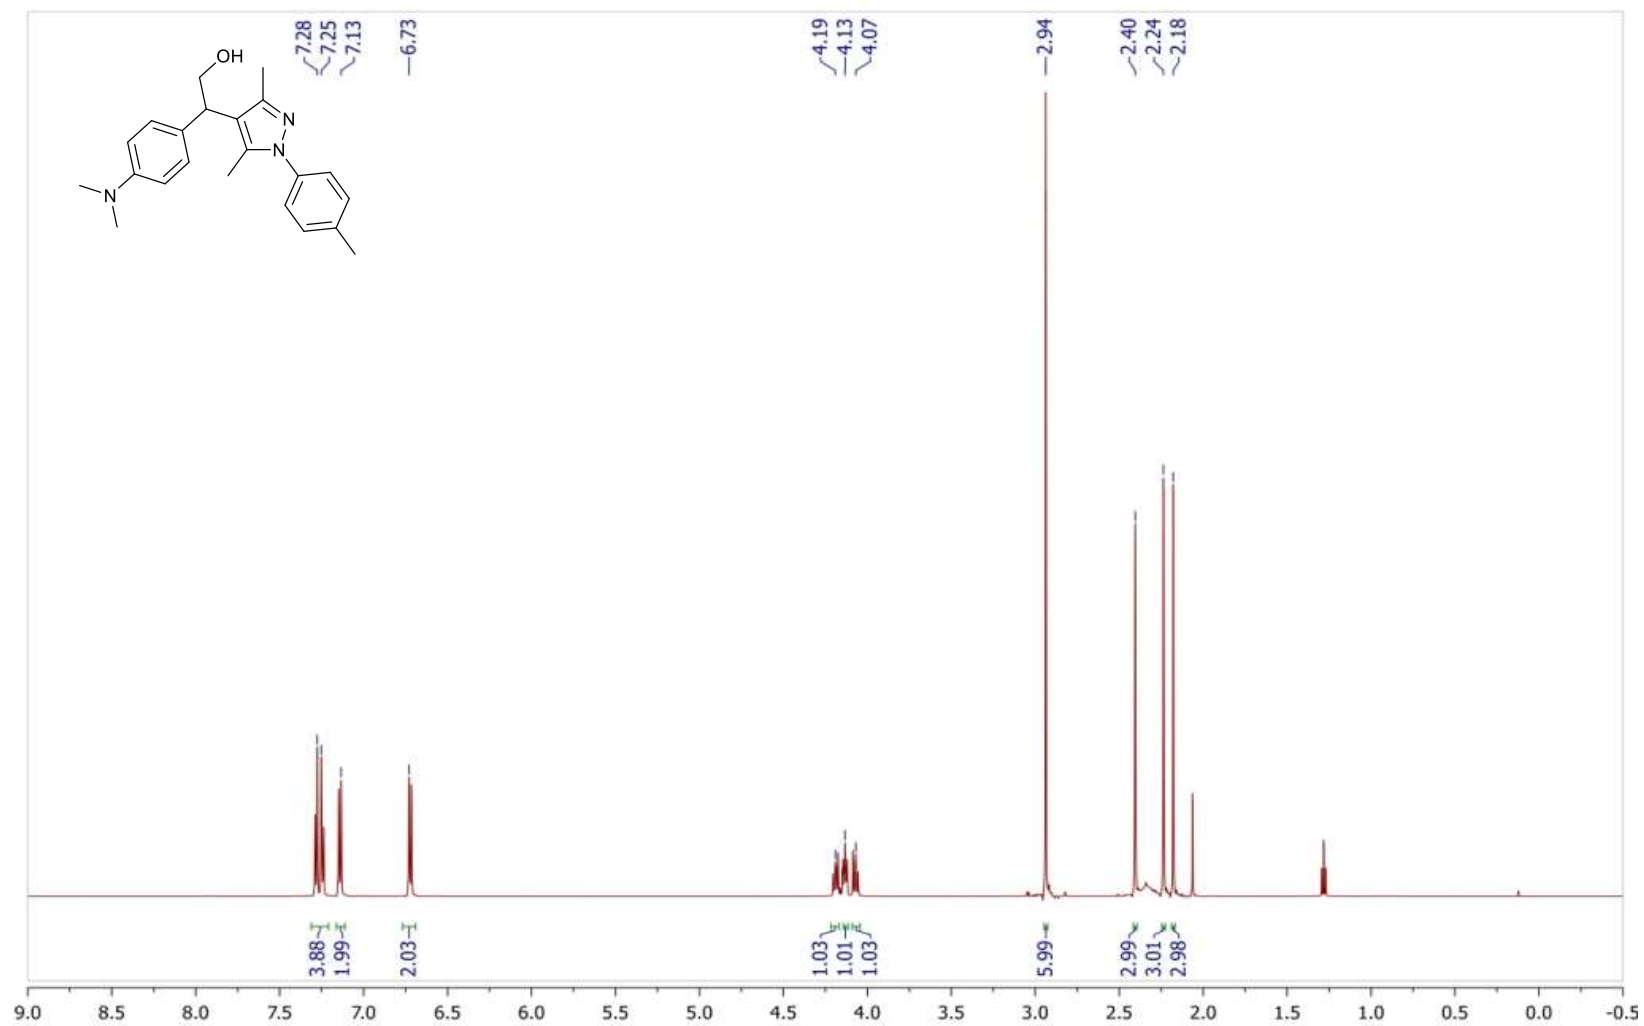

*2-[3,5-Dimethyl-1-(4-methylphenyl)-1H-pyrazol-4-yl]-2-[4-(dimethylamino)phenyl]ethanol (3h)*

$^{13}\text{C}$  NMR ( $\text{CDCl}_3$ , 150 MHz)

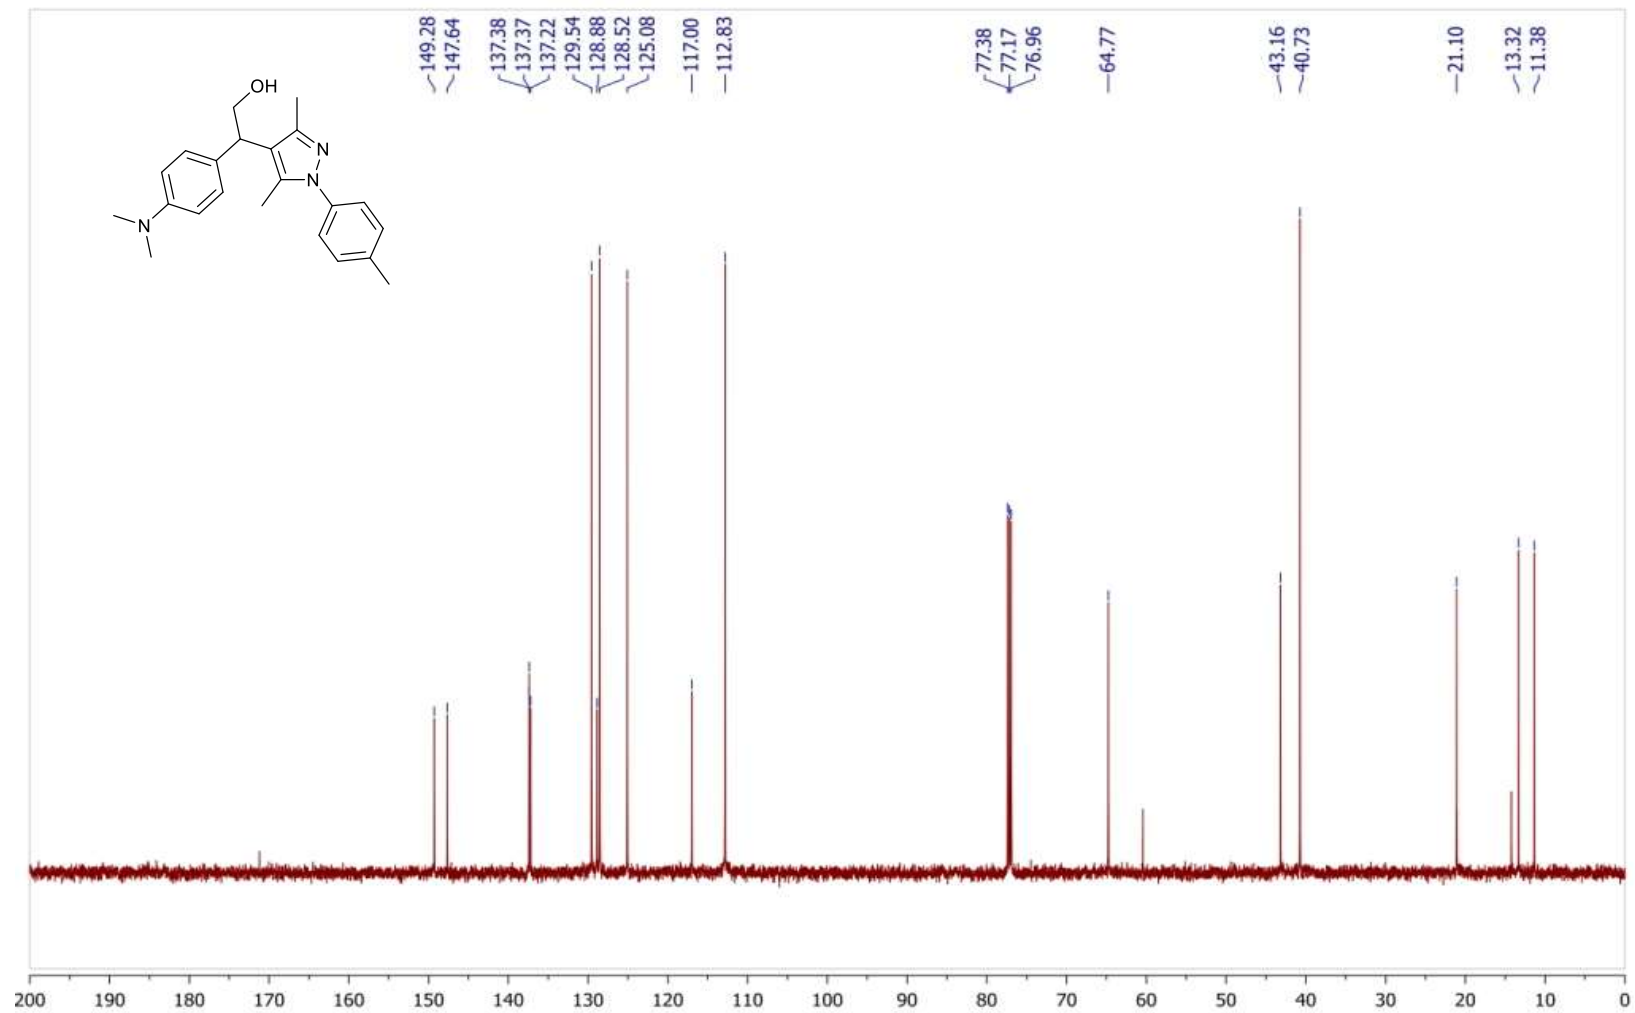

*2-(3,5-Dimethyl-1-phenyl-1H-pyrazol-4-yl)-2-(4-methoxyphenyl)ethanol (3i)*

<sup>1</sup>H NMR (CDCl<sub>3</sub>, 600 MHz)

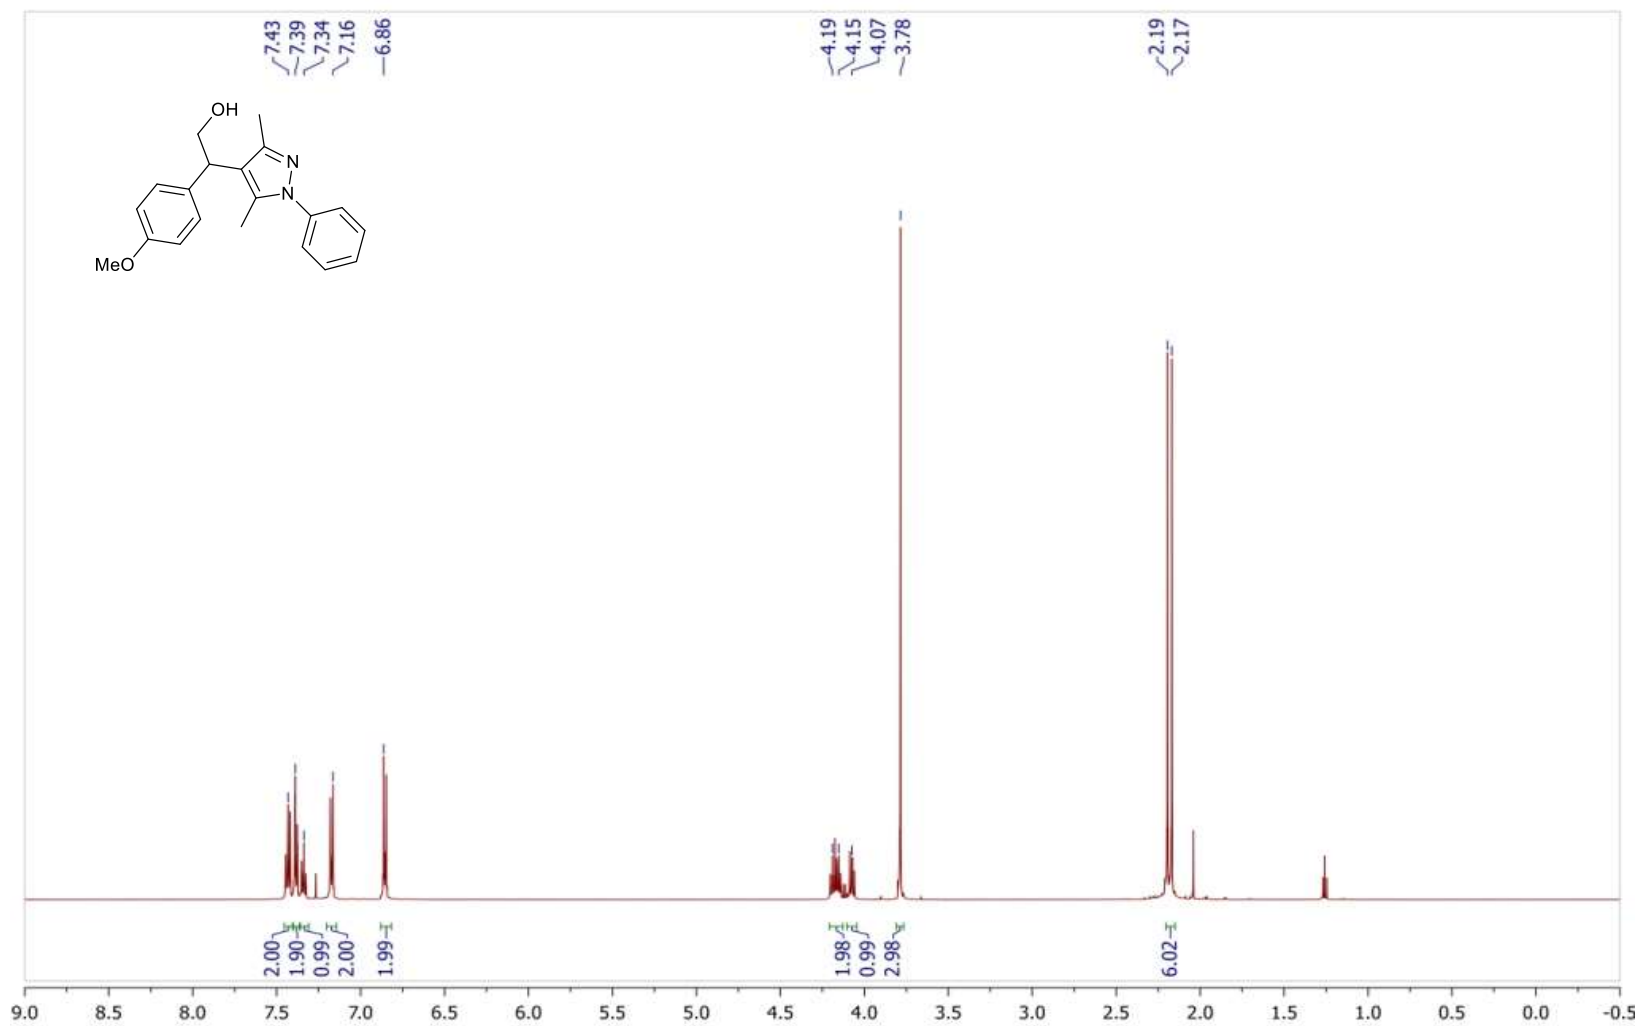



*2-(3,5-Dimethyl-1-phenyl-1H-pyrazol-4-yl)-2-(4-methoxyphenyl)ethanol (3i)*

$^{13}\text{C}$  NMR ( $\text{CDCl}_3$ , 150 MHz)

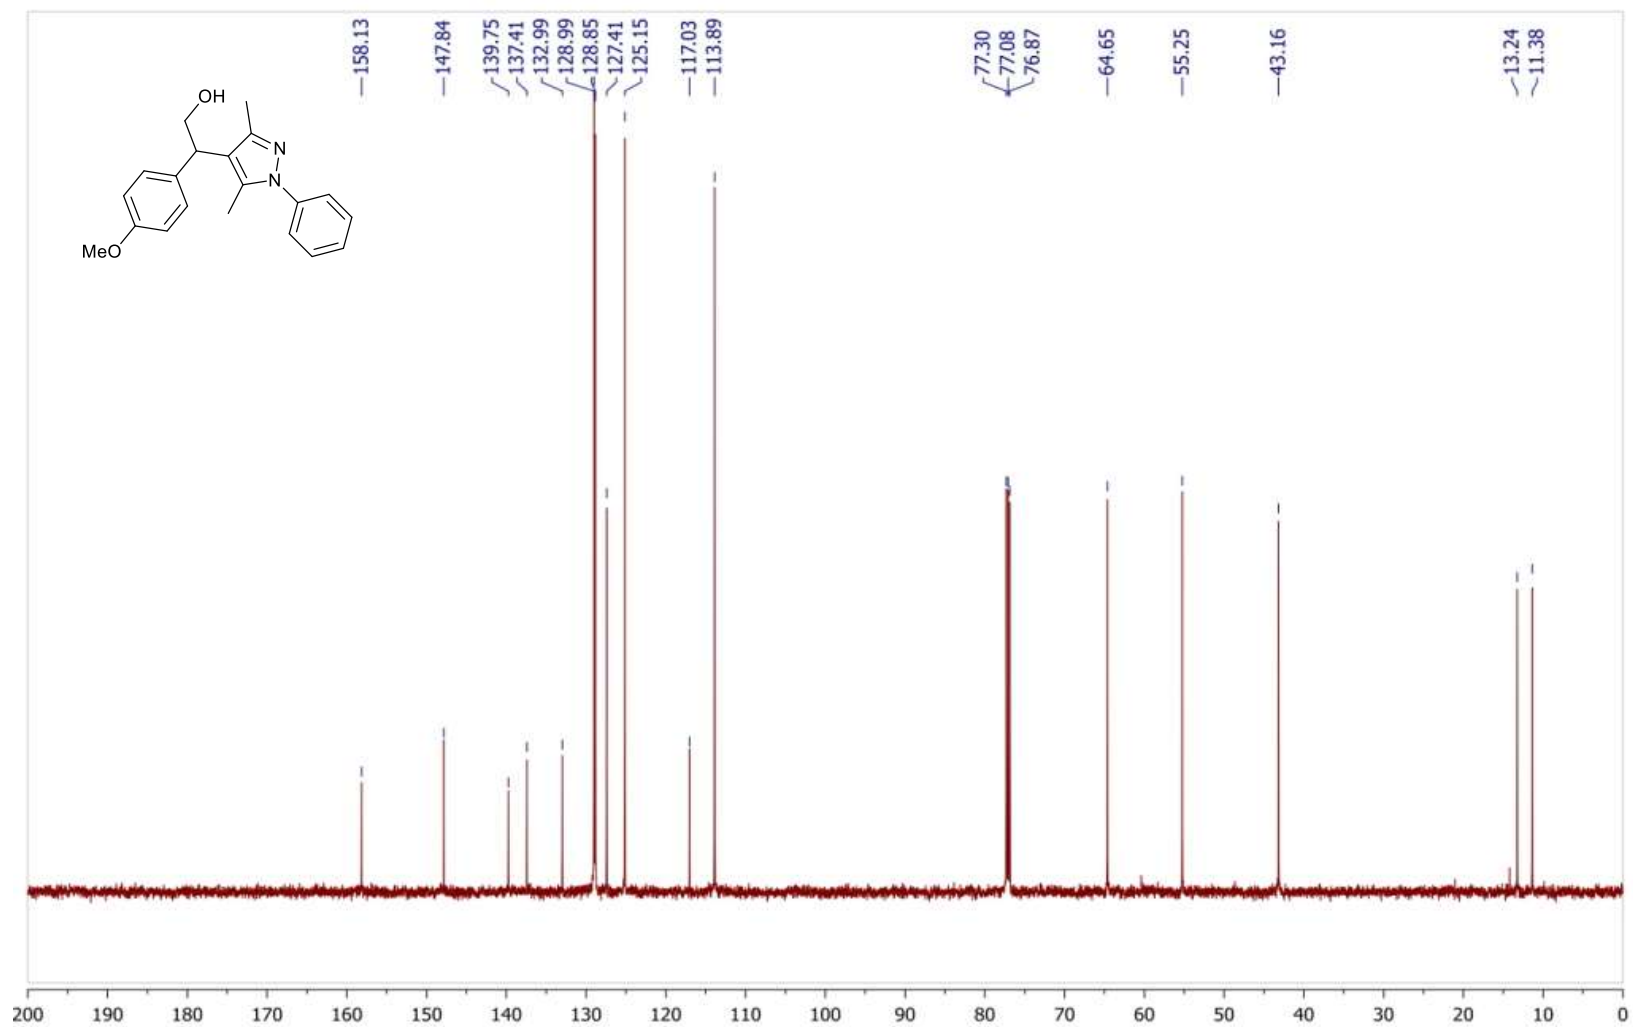

*2-(3,4-Dimethoxyphenyl)-2-(3,5-dimethyl-1-phenyl-1H-pyrazol-4-yl)ethanol (3j)*

<sup>1</sup>H NMR (CDCl<sub>3</sub>, 600 MHz)

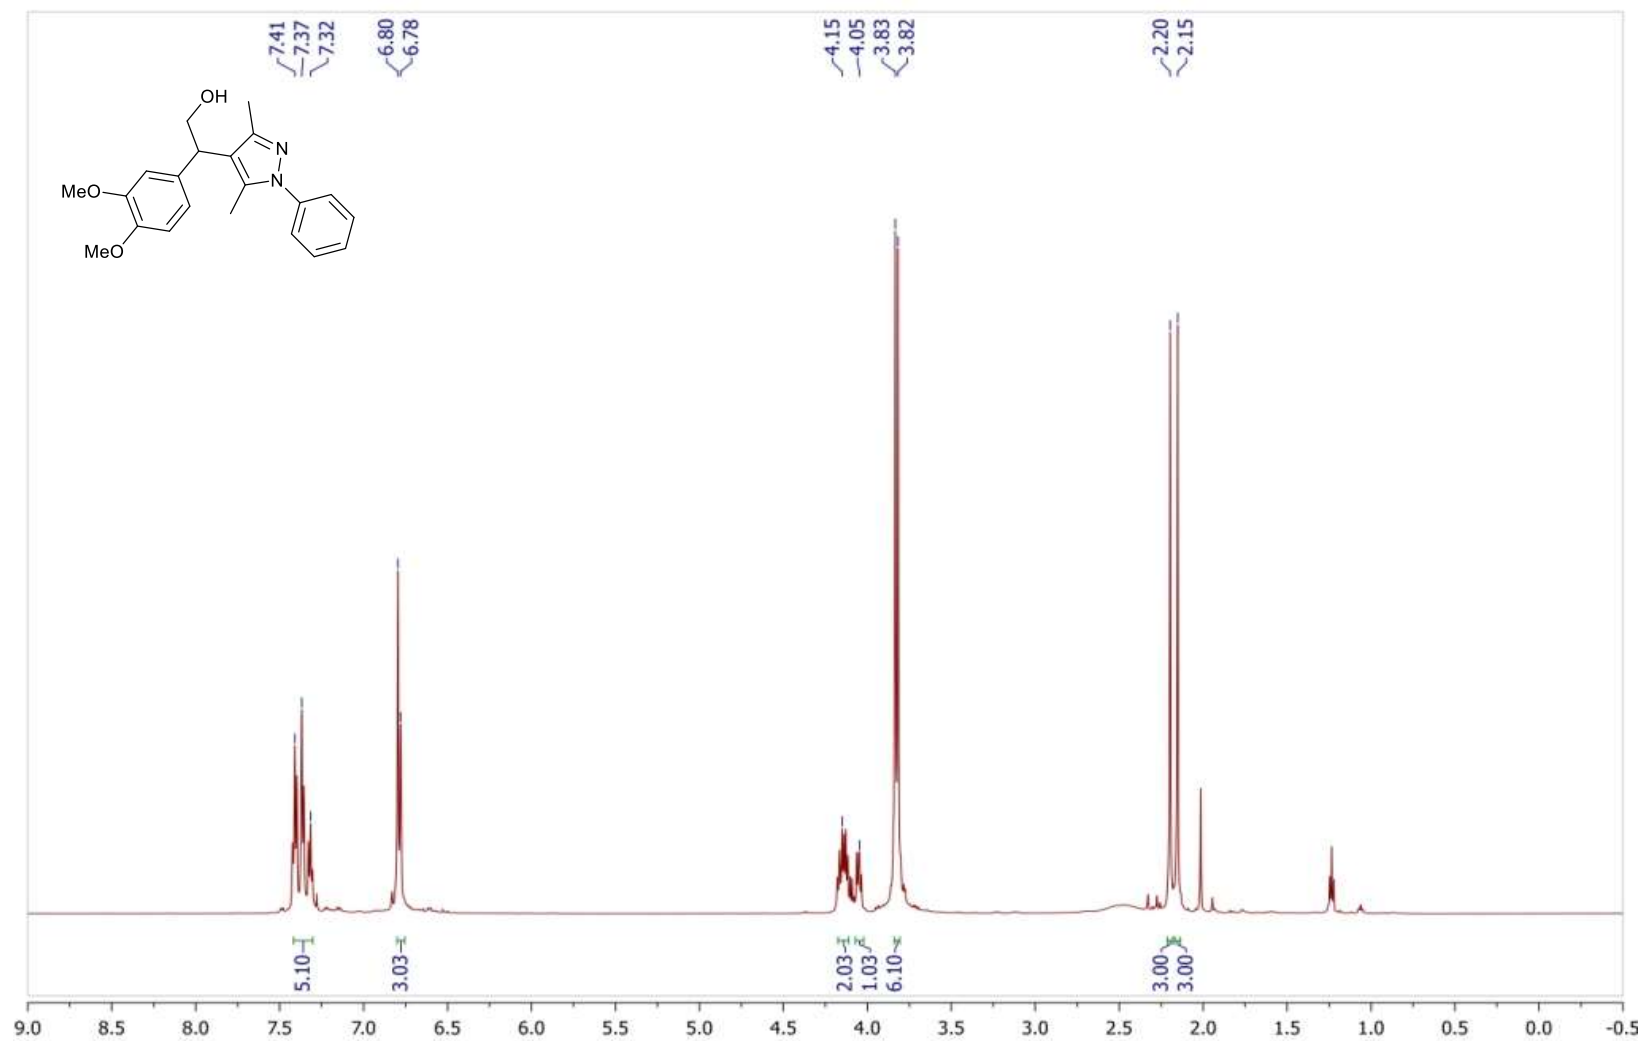

*2-(3,4-Dimethoxyphenyl)-2-(3,5-dimethyl-1-phenyl-1H-pyrazol-4-yl)ethanol (3j)*

<sup>13</sup>C NMR (CDCl<sub>3</sub>, 150 MHz)

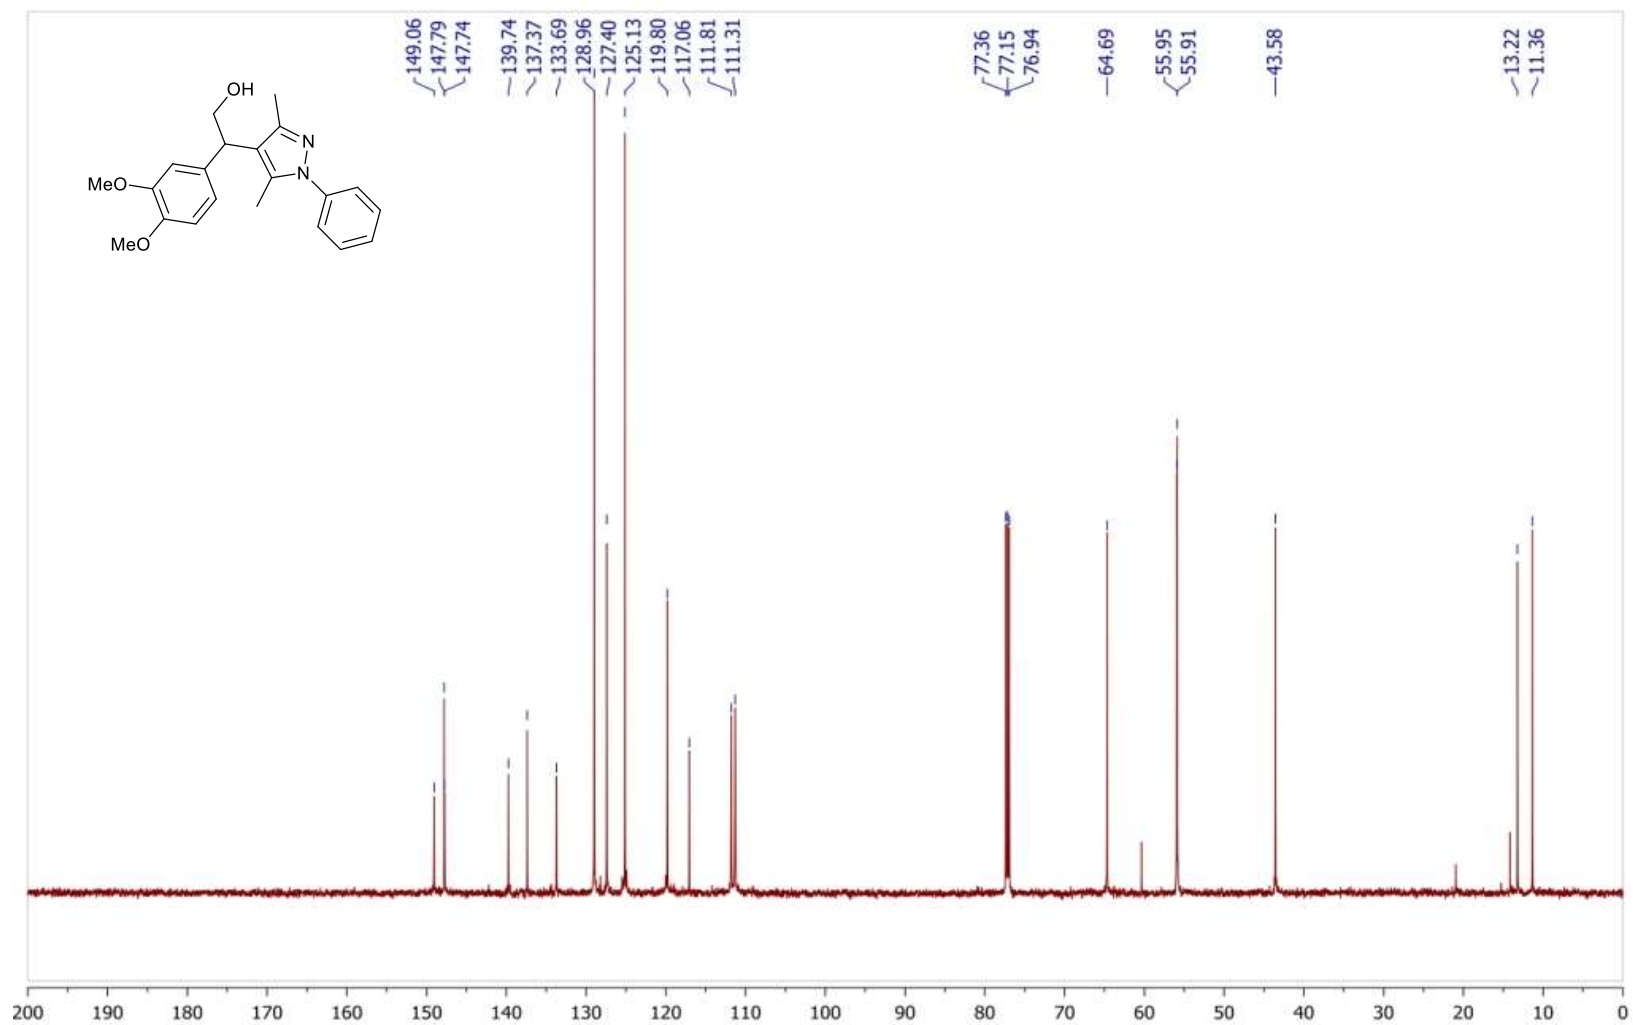

*2-(3,4-Dimethoxyphenyl)-2-(1,3,5-trimethyl-1H-pyrazol-4-yl)ethanol (3k)*

<sup>1</sup>H NMR (CDCl<sub>3</sub>, 600 MHz)

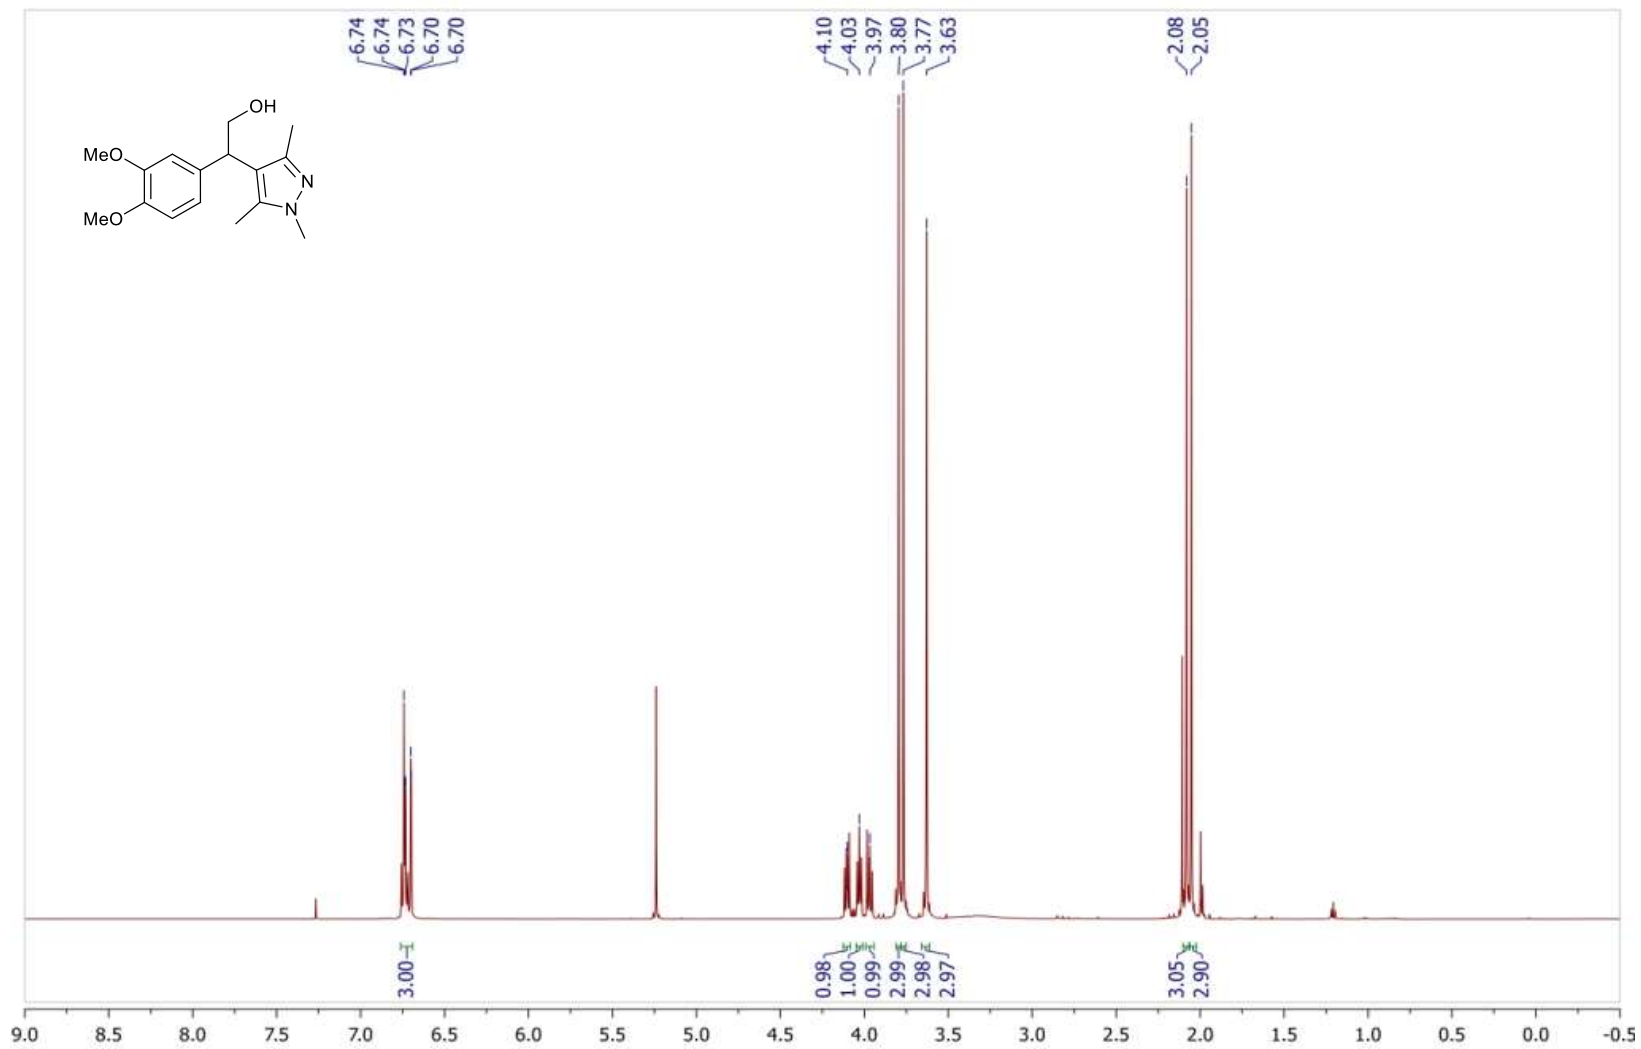

*2-(3,4-Dimethoxyphenyl)-2-(1,3,5-trimethyl-1H-pyrazol-4-yl)ethanol (3k)*

<sup>13</sup>C NMR (CDCl<sub>3</sub>, 150 MHz)

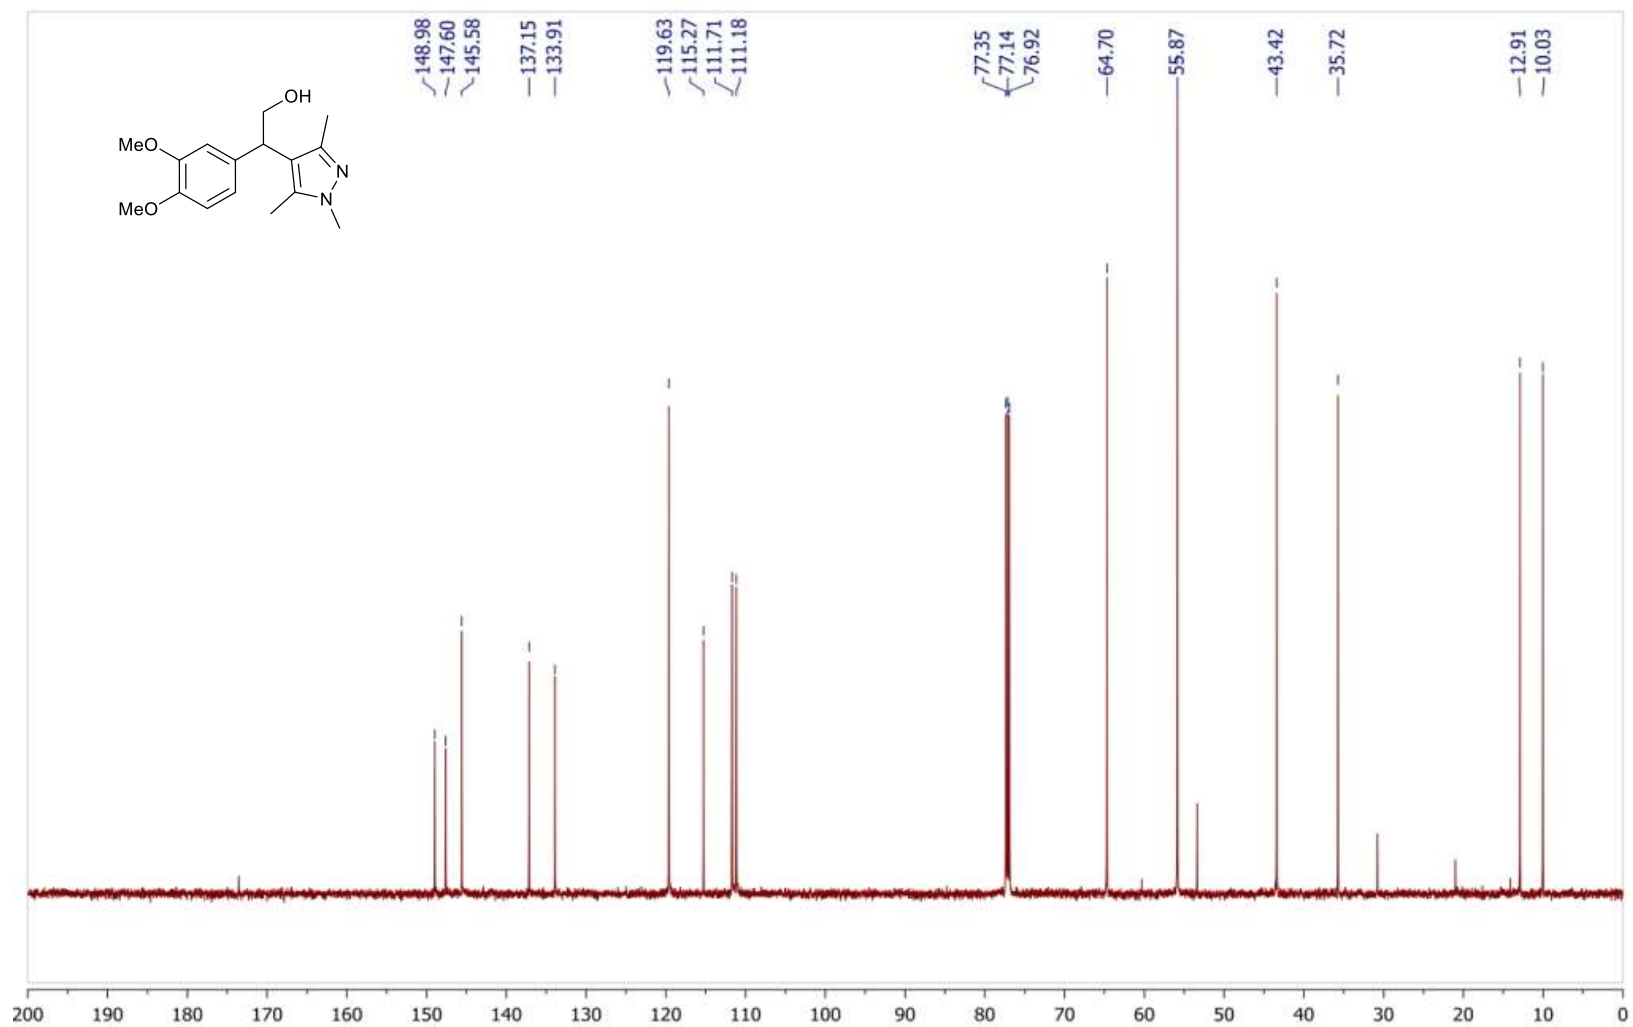

*2-[1-(4-Fluorophenyl)-3,5-dimethyl-1H-pyrazol-4-yl]-2-(3,4,5-trimethoxyphenyl)ethanol (3l)*

<sup>1</sup>H NMR (CDCl<sub>3</sub>, 600 MHz)

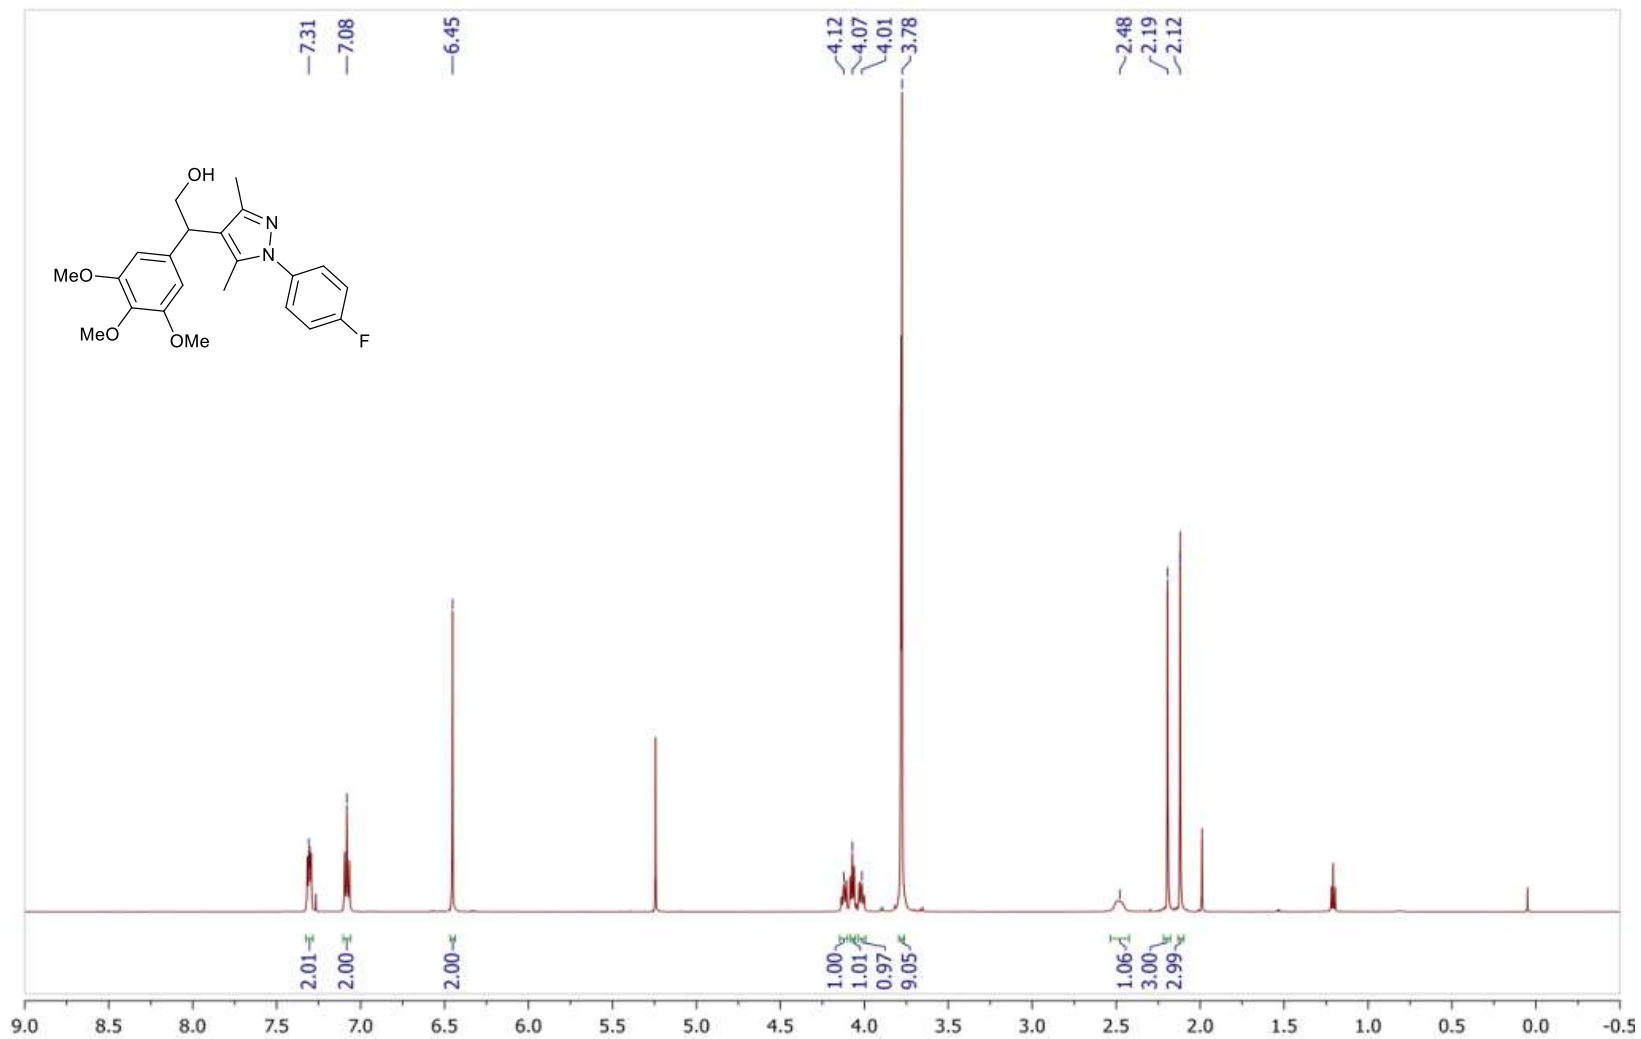

*2-[1-(4-Fluorophenyl)-3,5-dimethyl-1H-pyrazol-4-yl]-2-(3,4,5-trimethoxyphenyl)ethanol (3l)*

<sup>13</sup>C NMR (CDCl<sub>3</sub>, 150 MHz)

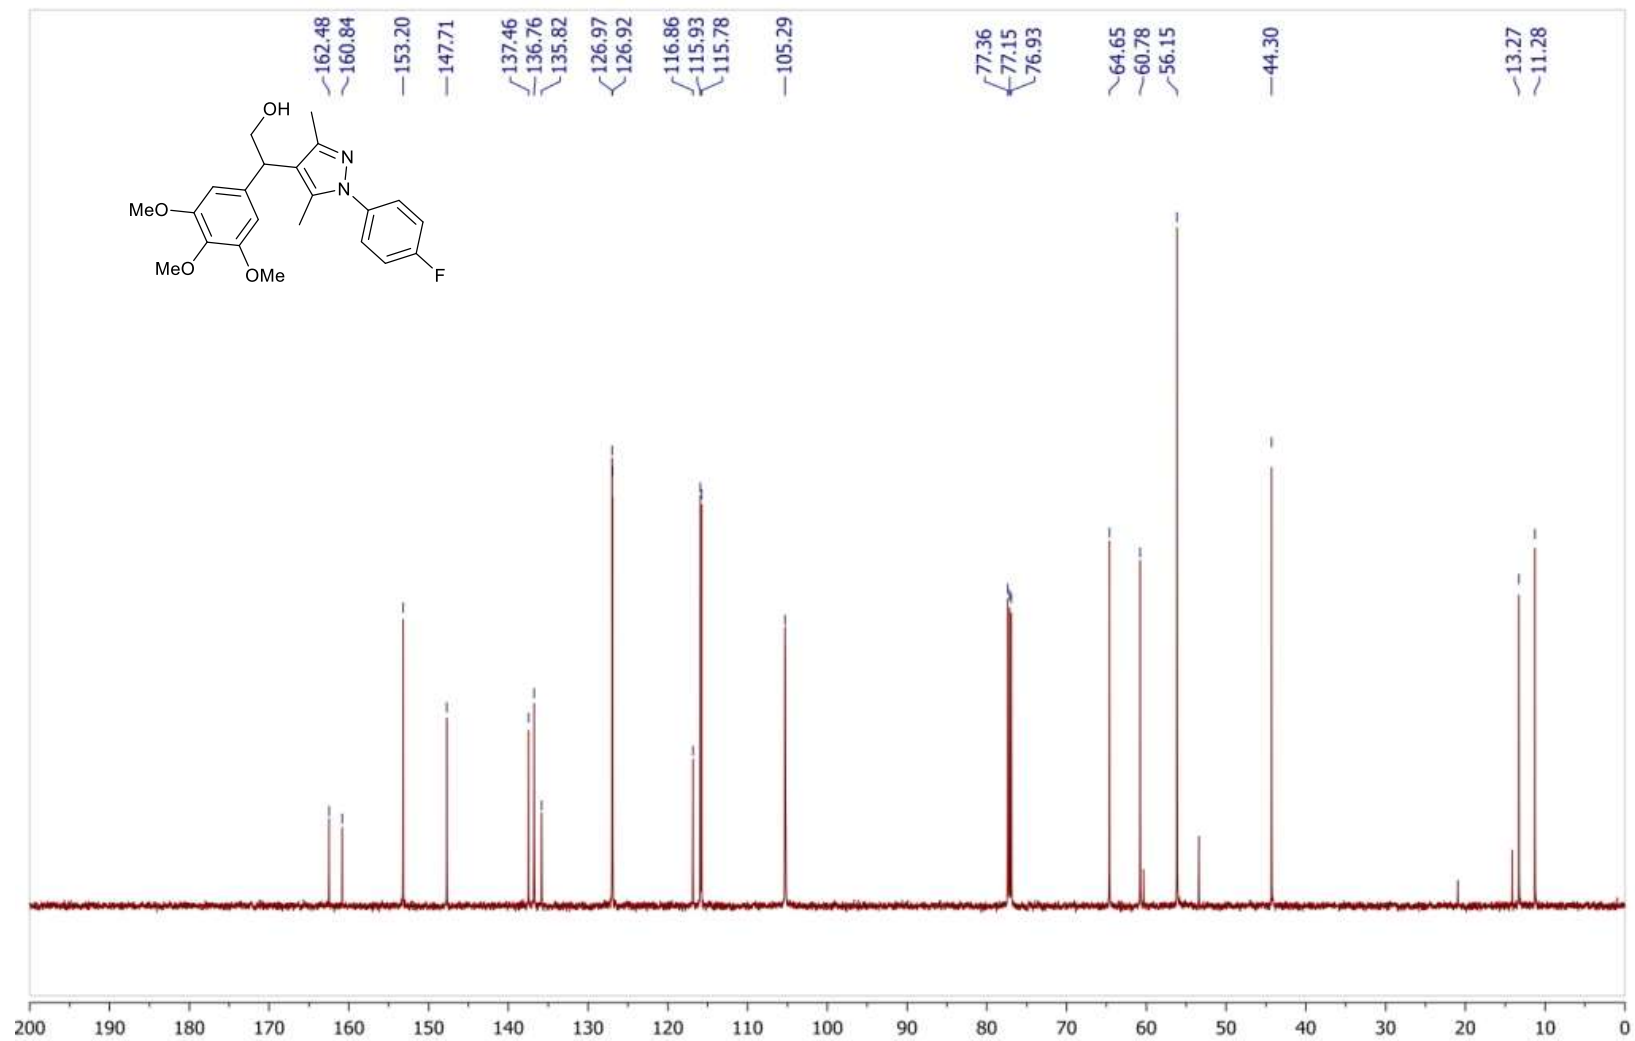

*2-(3,5-Dimethyl-1-phenyl-1H-pyrazol-4-yl)-2-(thiophen-2-yl)ethanol (3m)*

<sup>1</sup>H NMR (CDCl<sub>3</sub>, 600 MHz)

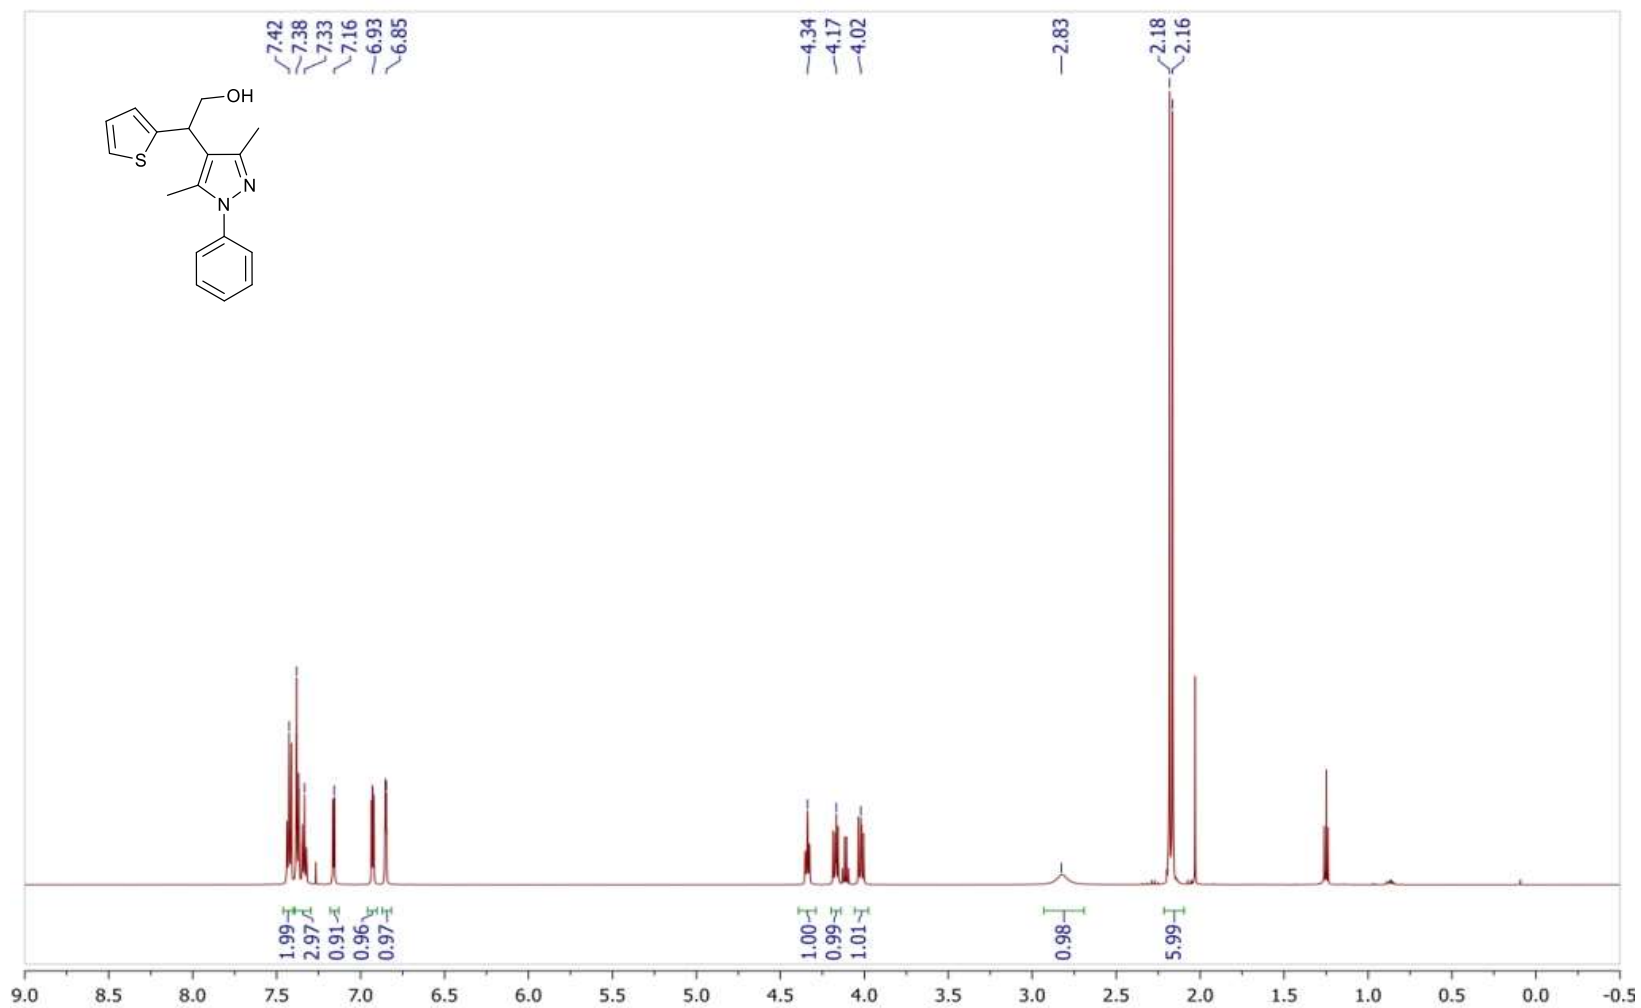



*2-(3,5-Dimethyl-1-phenyl-1H-pyrazol-4-yl)-2-(thiophen-2-yl)ethanol (3m)*

$^{13}\text{C}$  NMR ( $\text{CDCl}_3$ , 150 MHz)

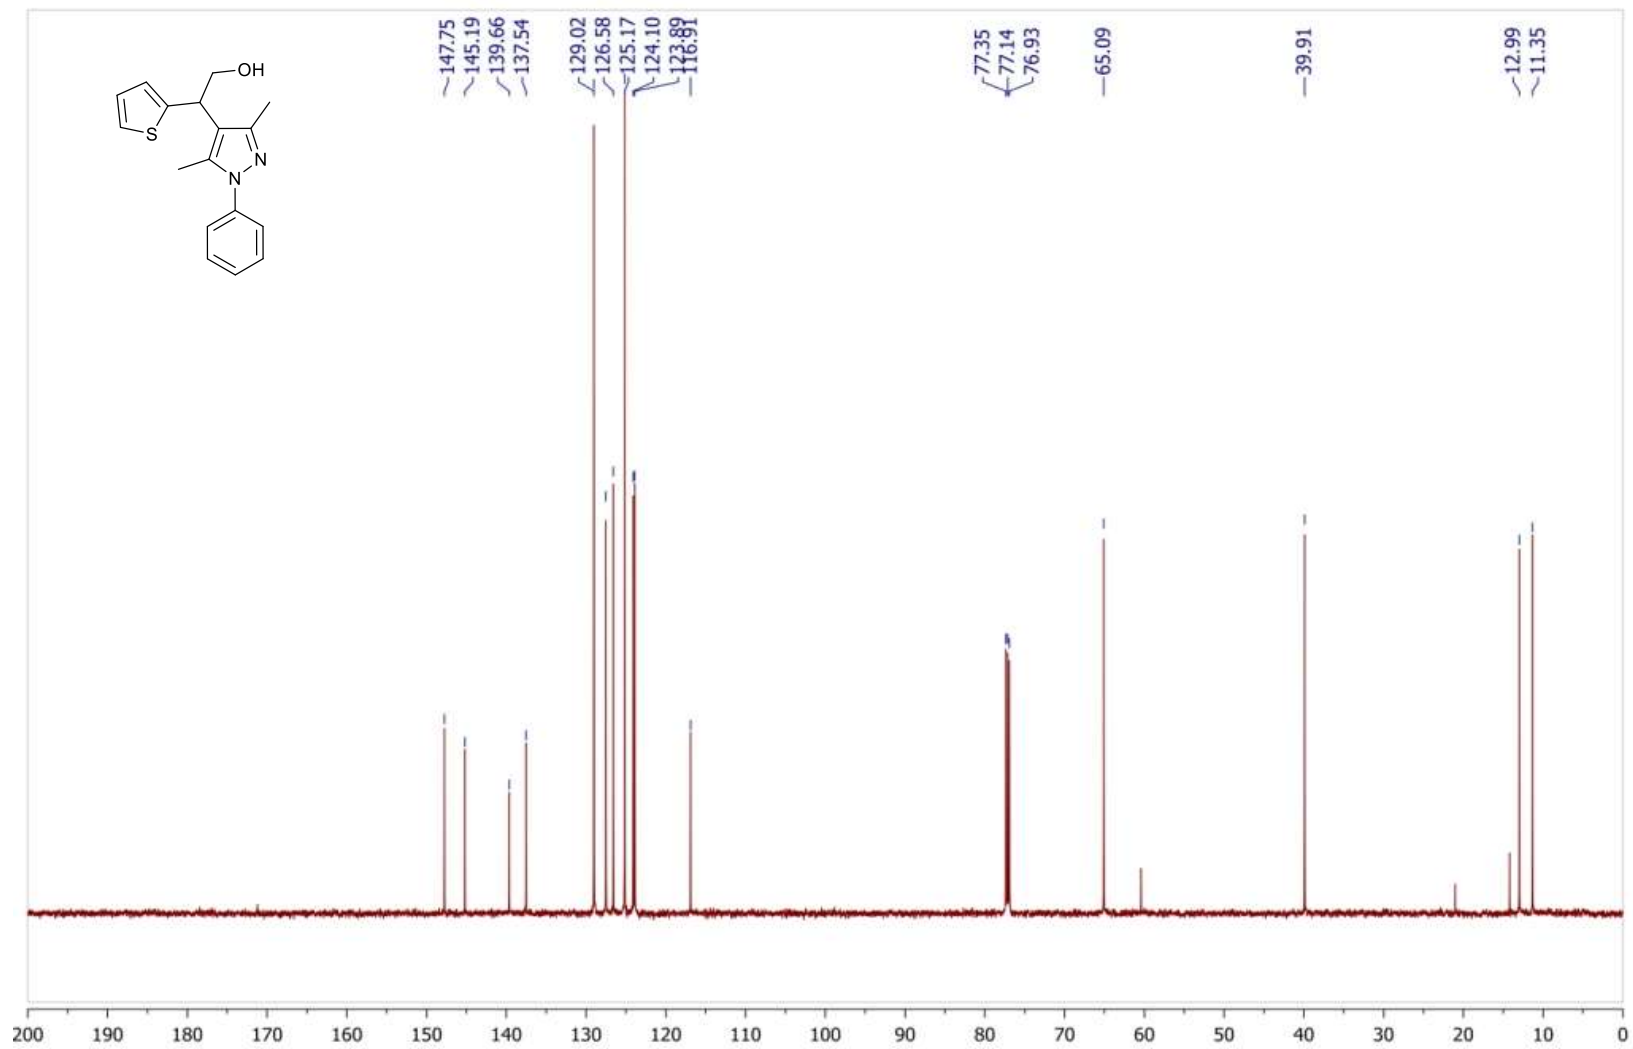

2-[1-(4-Fluorophenyl)-3,5-dimethyl-1H-pyrazol-4-yl]-2-(thiophen-2-yl)ethanol (3n)

<sup>1</sup>H NMR (CDCl<sub>3</sub>, 600 MHz)

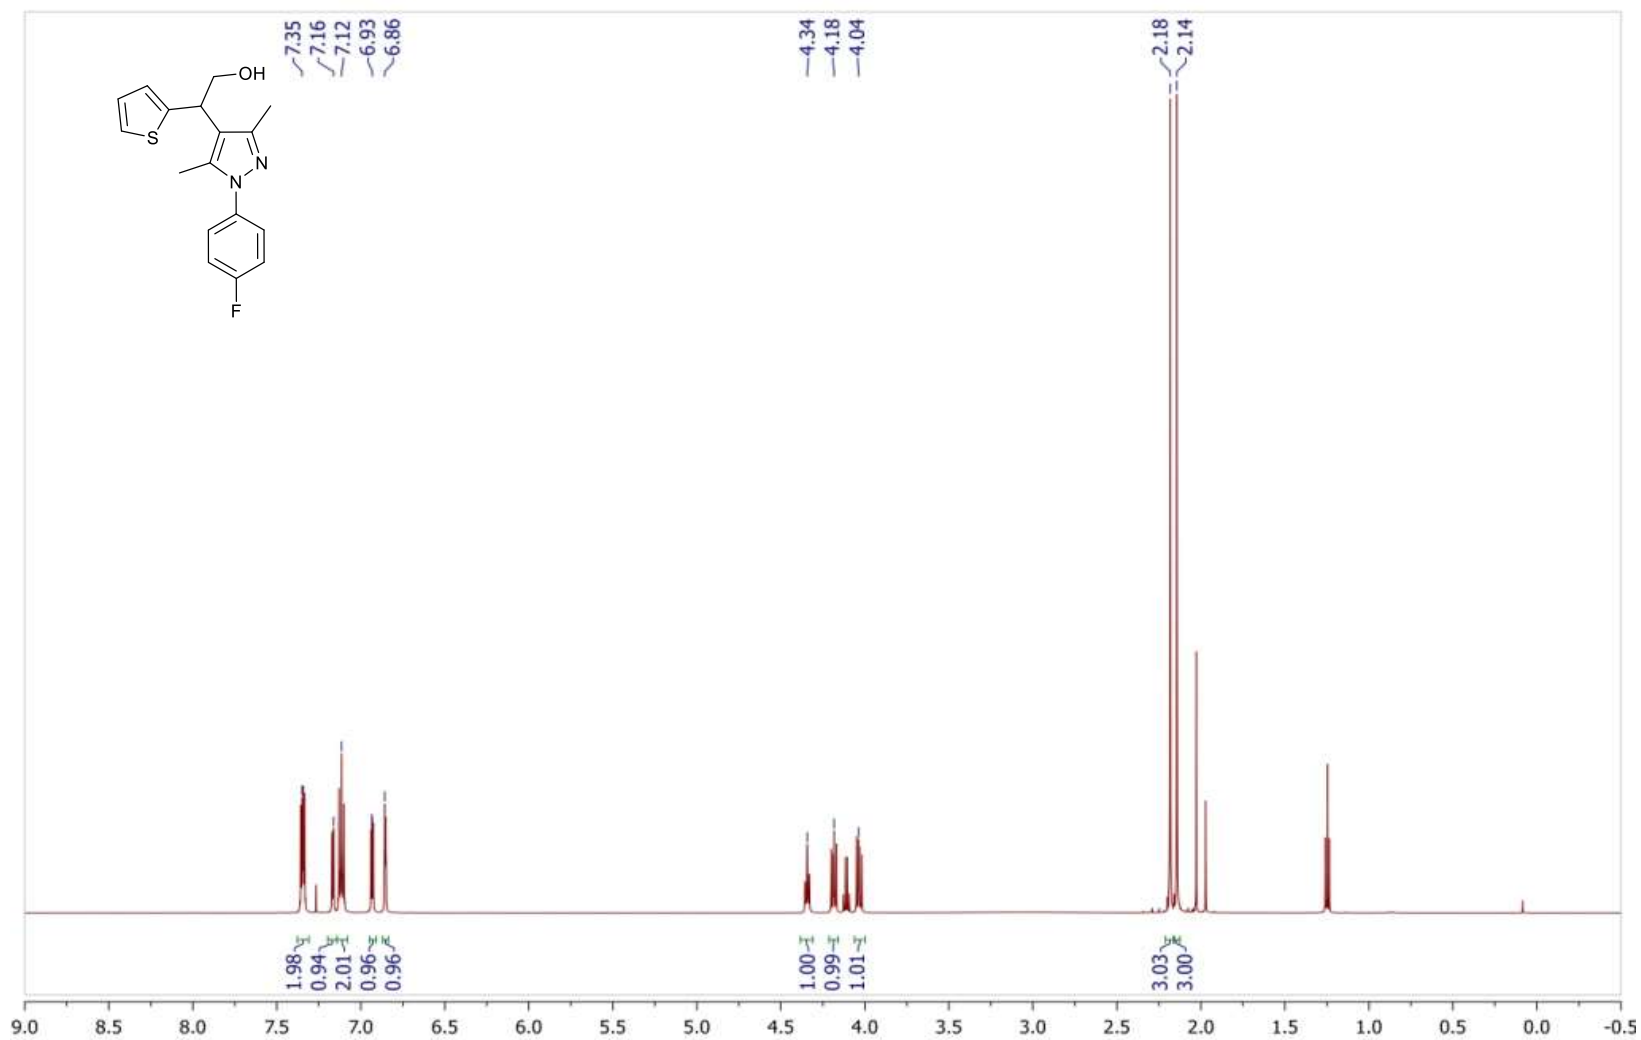

*2-[1-(4-Fluorophenyl)-3,5-dimethyl-1H-pyrazol-4-yl]-2-(thiophen-2-yl)ethanol (3n)*

$^{13}\text{C}$  NMR ( $\text{CDCl}_3$ , 150 MHz)

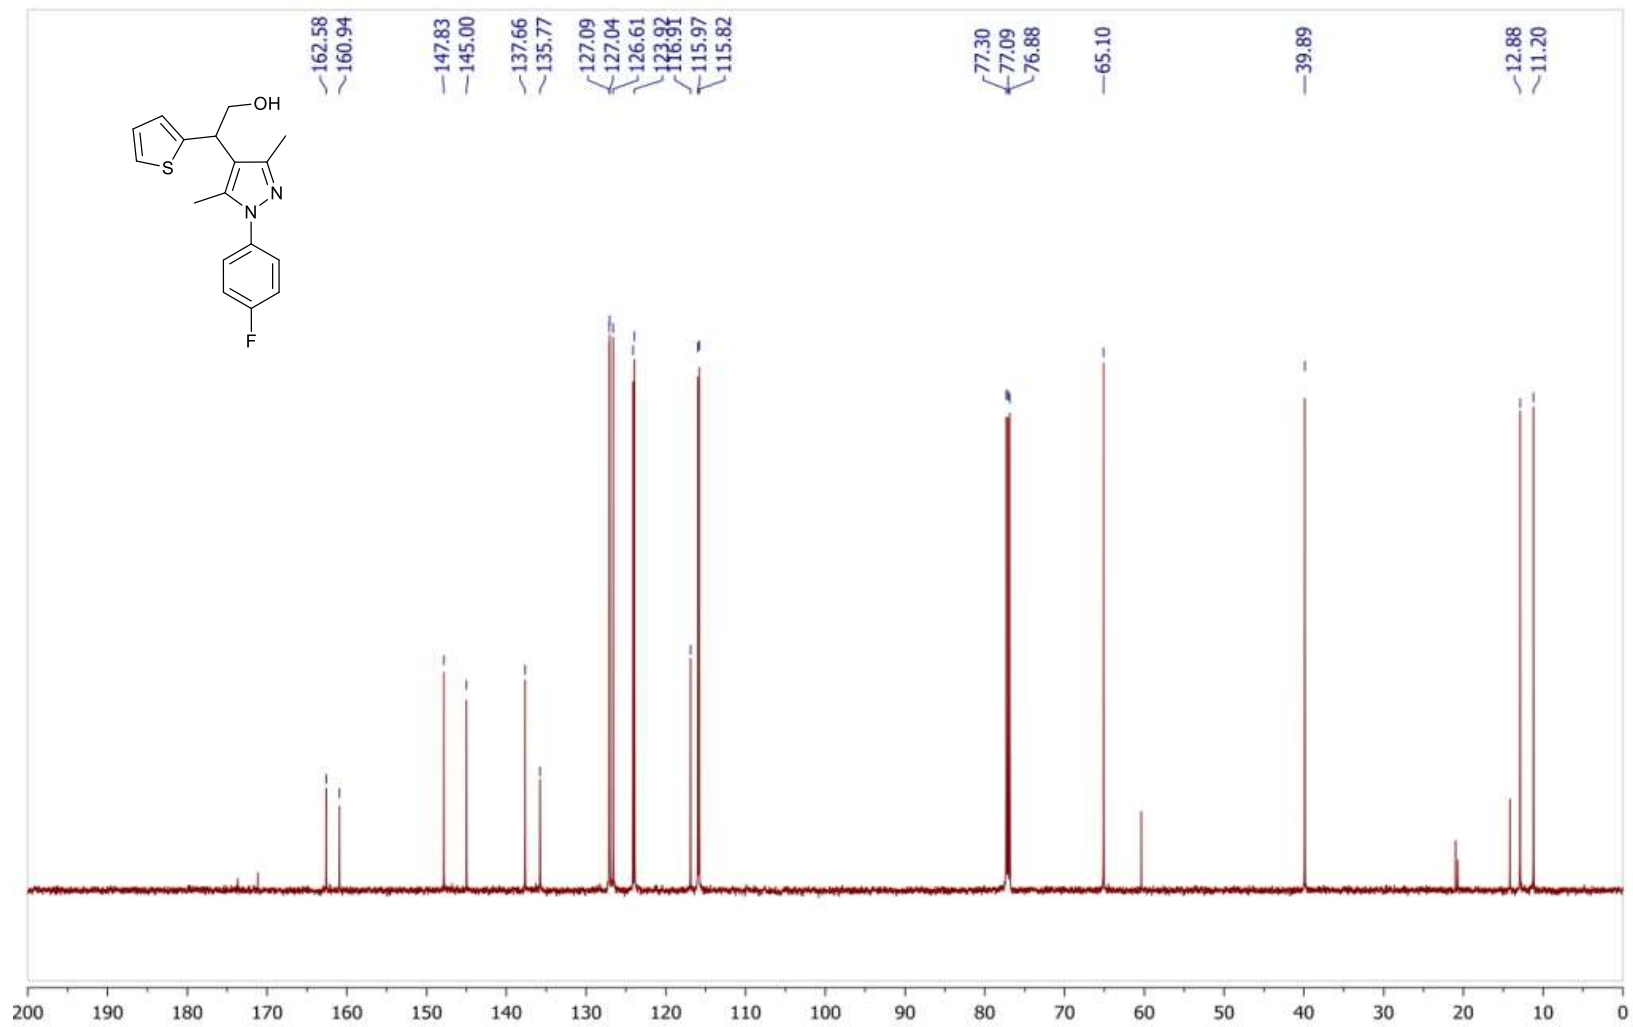

*2-(Thiophen-2-yl)-2-(1,3,5-trimethyl-1H-pyrazol-4-yl)ethanol (3o)*

<sup>1</sup>H NMR (CDCl<sub>3</sub>, 600 MHz)

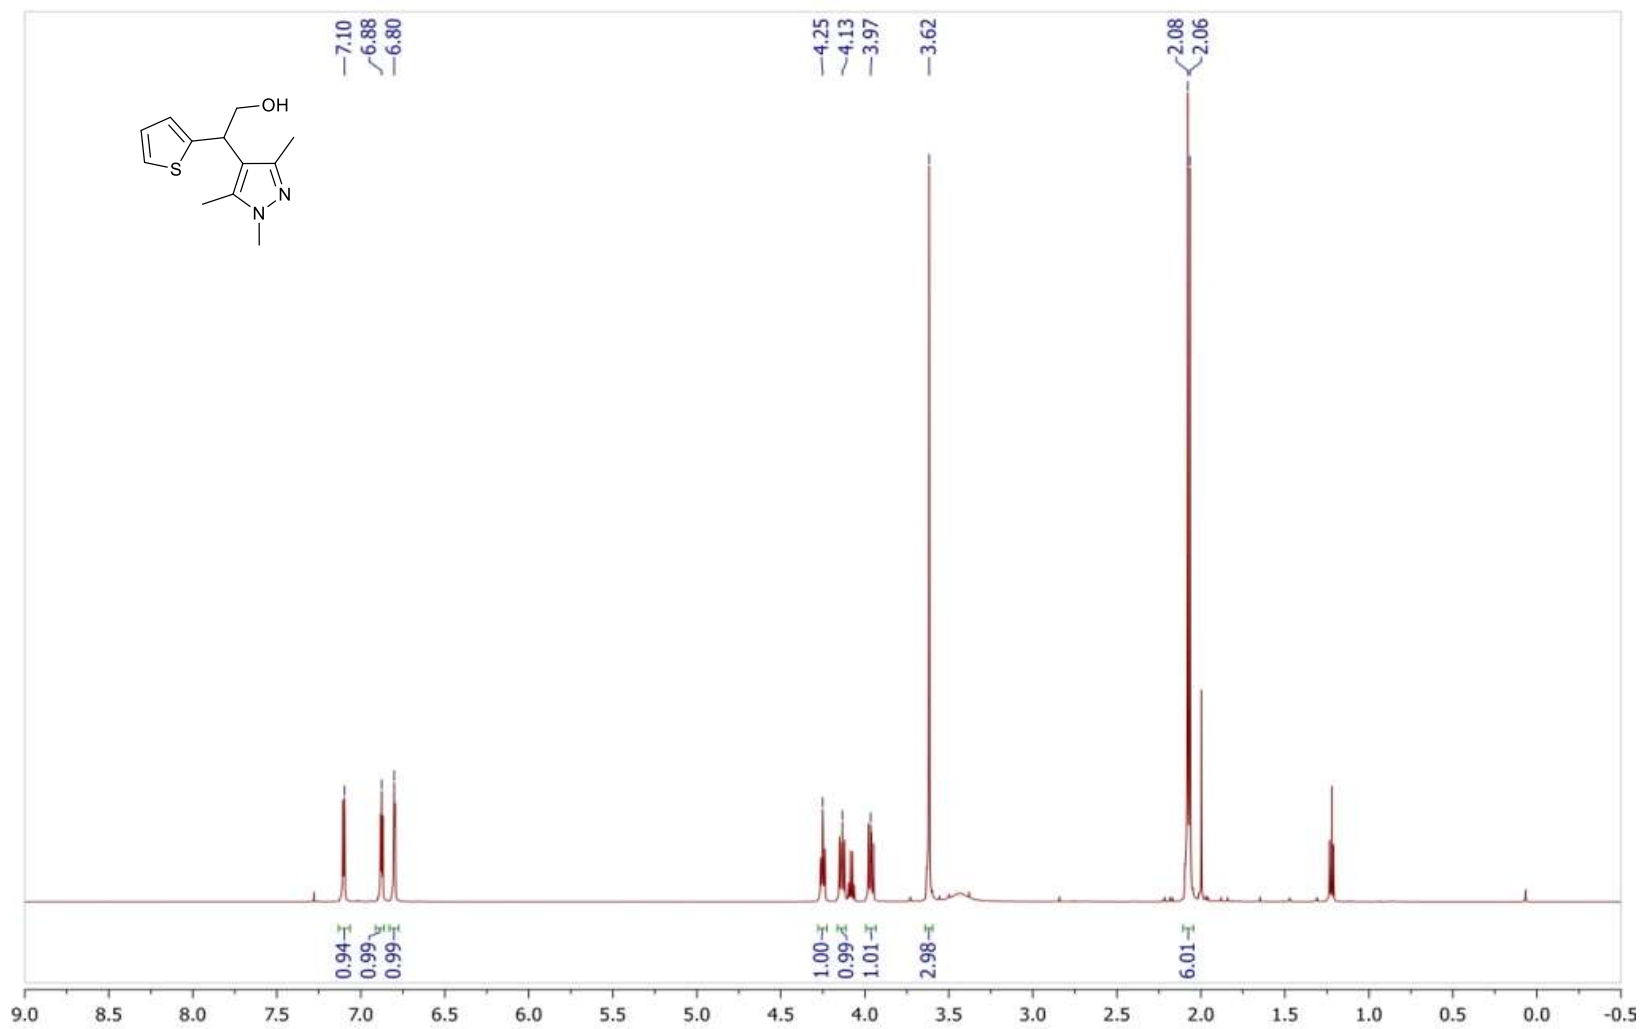

*2-(Thiophen-2-yl)-2-(1,3,5-trimethyl-1H-pyrazol-4-yl)ethanol (3o)*

$^{13}\text{C}$  NMR ( $\text{CDCl}_3$ , 150 MHz)

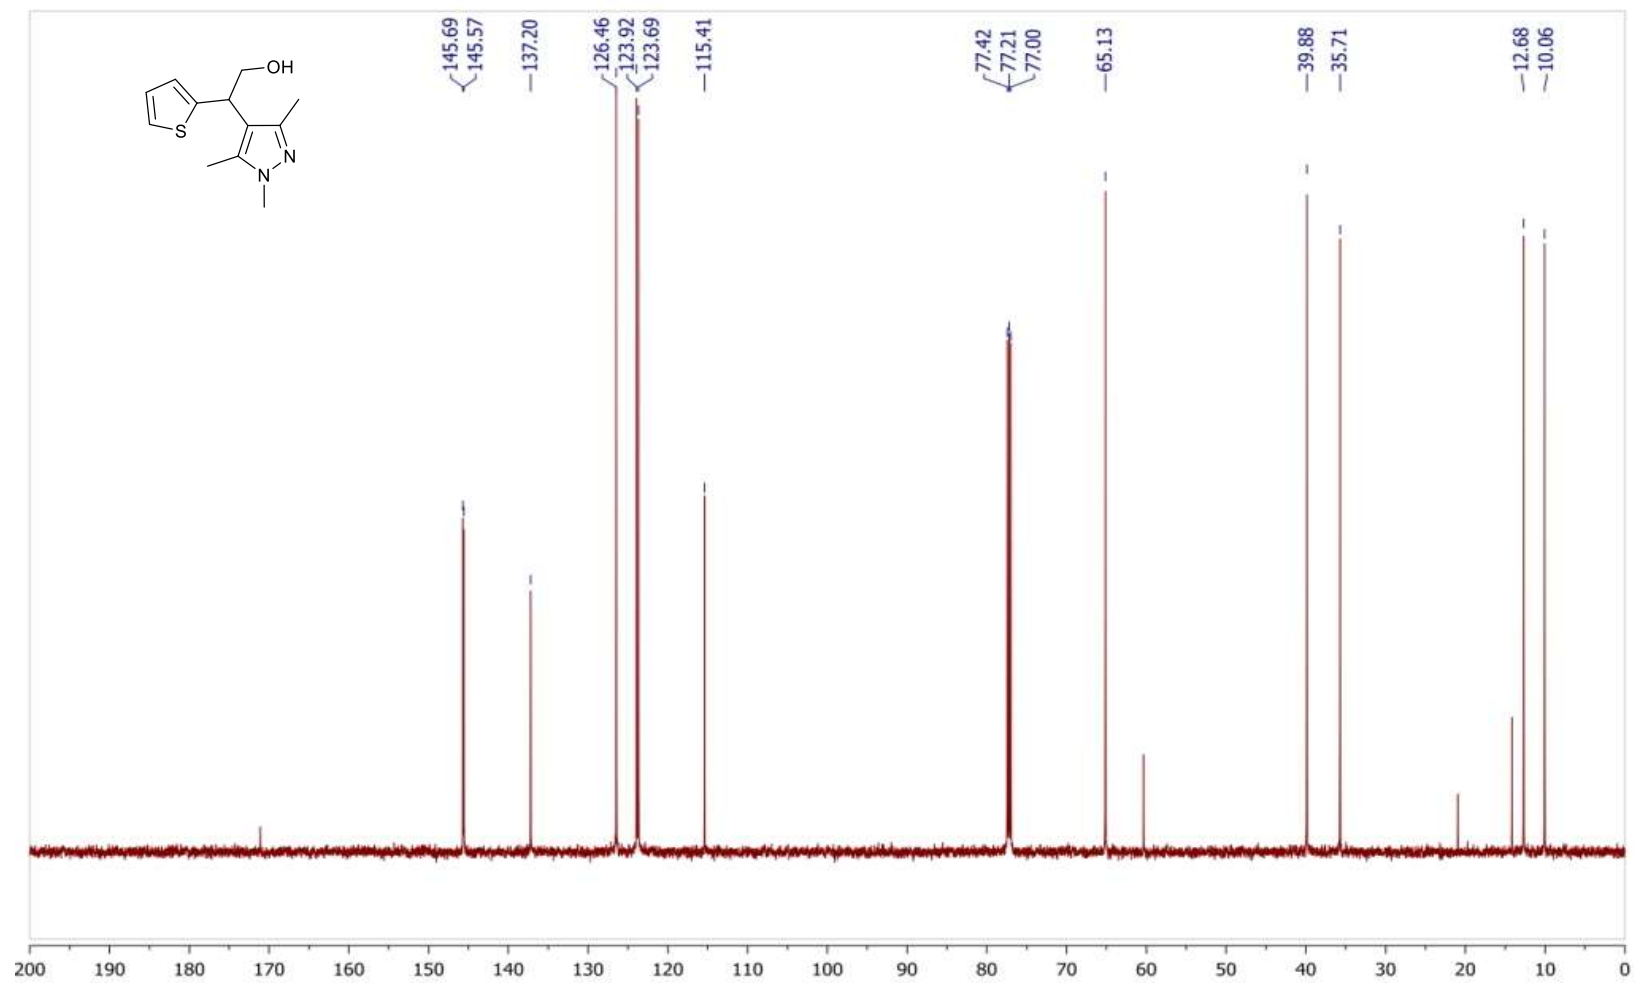

*2-(3,5-Dimethyl-1-phenyl-1H-pyrazol-4-yl)-2-(1-methyl-1H-indol-3-yl)ethanol (3p)*

<sup>1</sup>H NMR (CDCl<sub>3</sub>, 600 MHz)

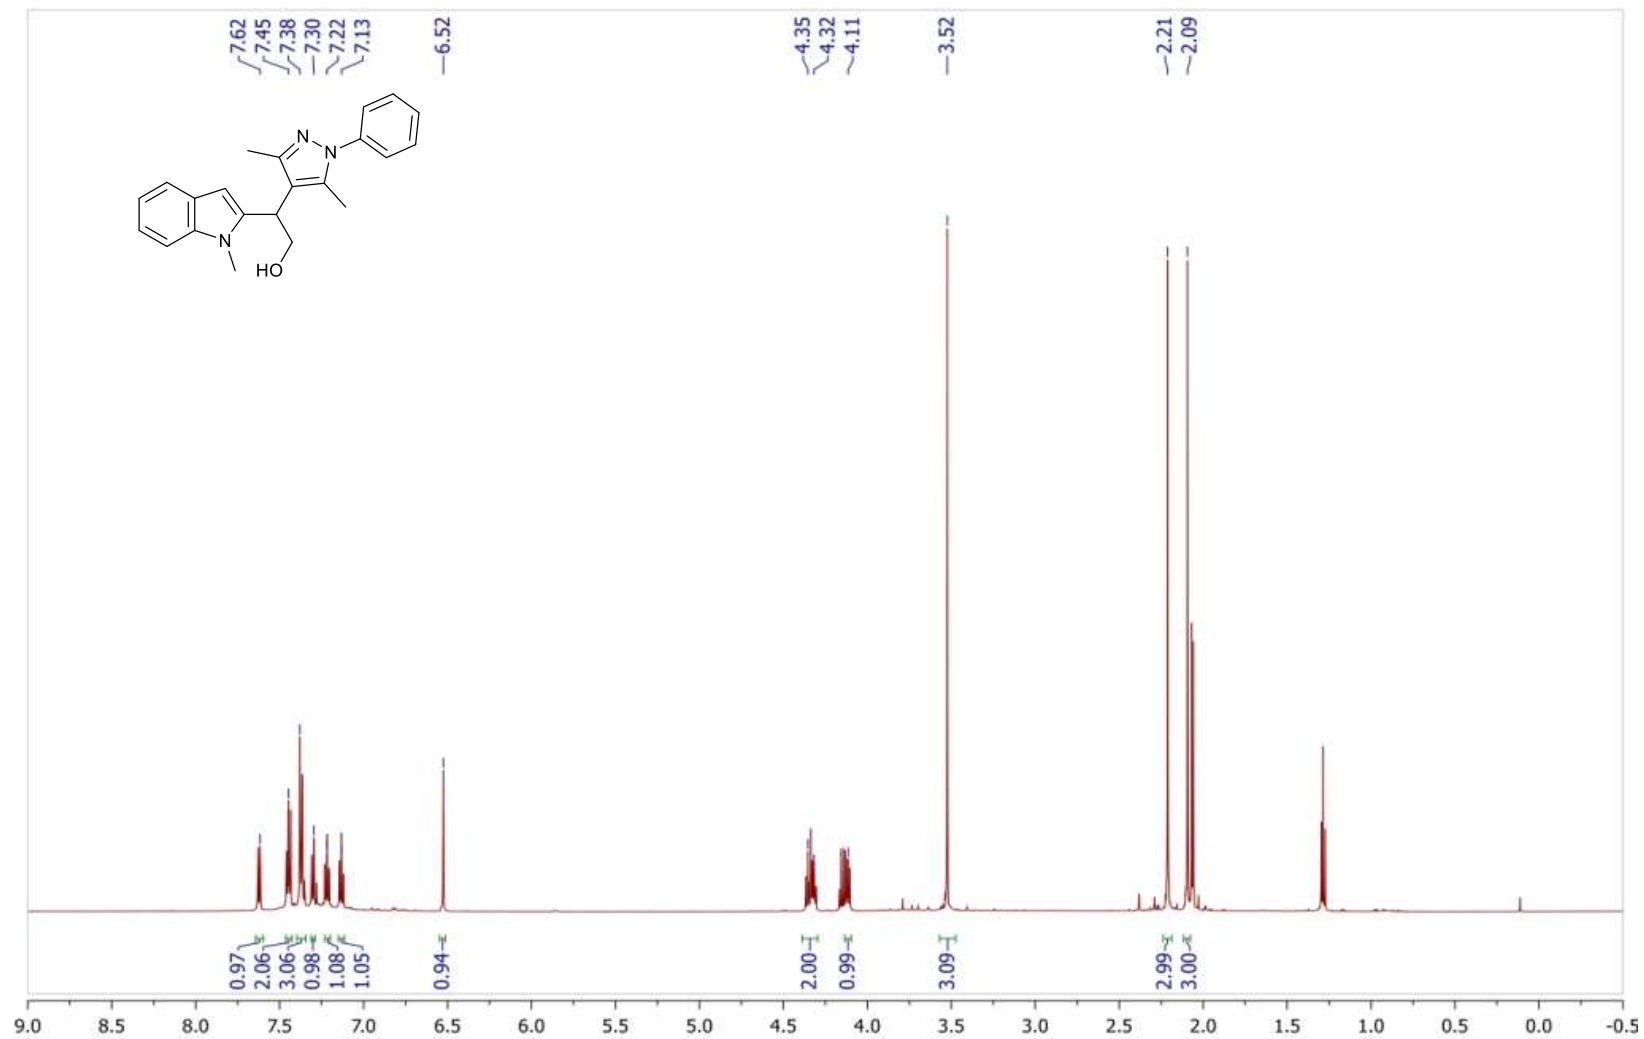

*2-(3,5-Dimethyl-1-phenyl-1H-pyrazol-4-yl)-2-(1-methyl-1H-indol-3-yl)ethanol (3p)*

<sup>13</sup>C NMR (CDCl<sub>3</sub>, 150 MHz)

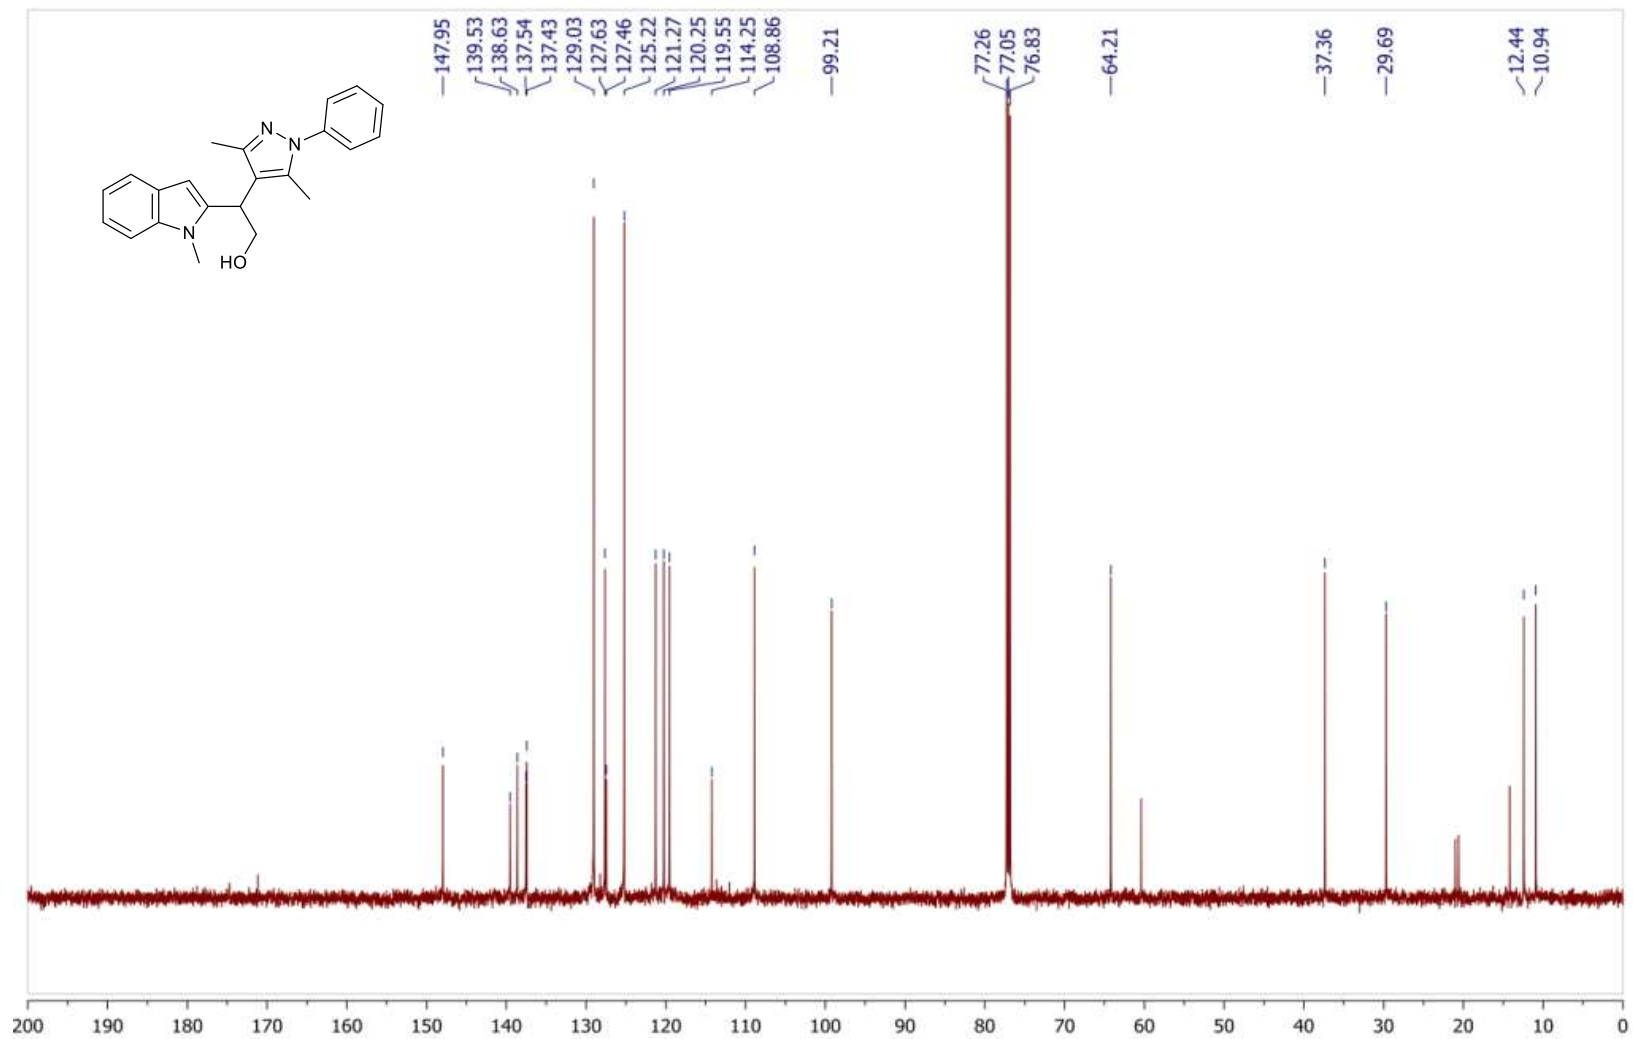

*(E)*-2-(3,5-Dimethyl-1-phenyl-1H-pyrazol-4-yl)-4-phenylbut-3-en-1-ol (3q)

<sup>1</sup>H NMR (CDCl<sub>3</sub>, 600 MHz)

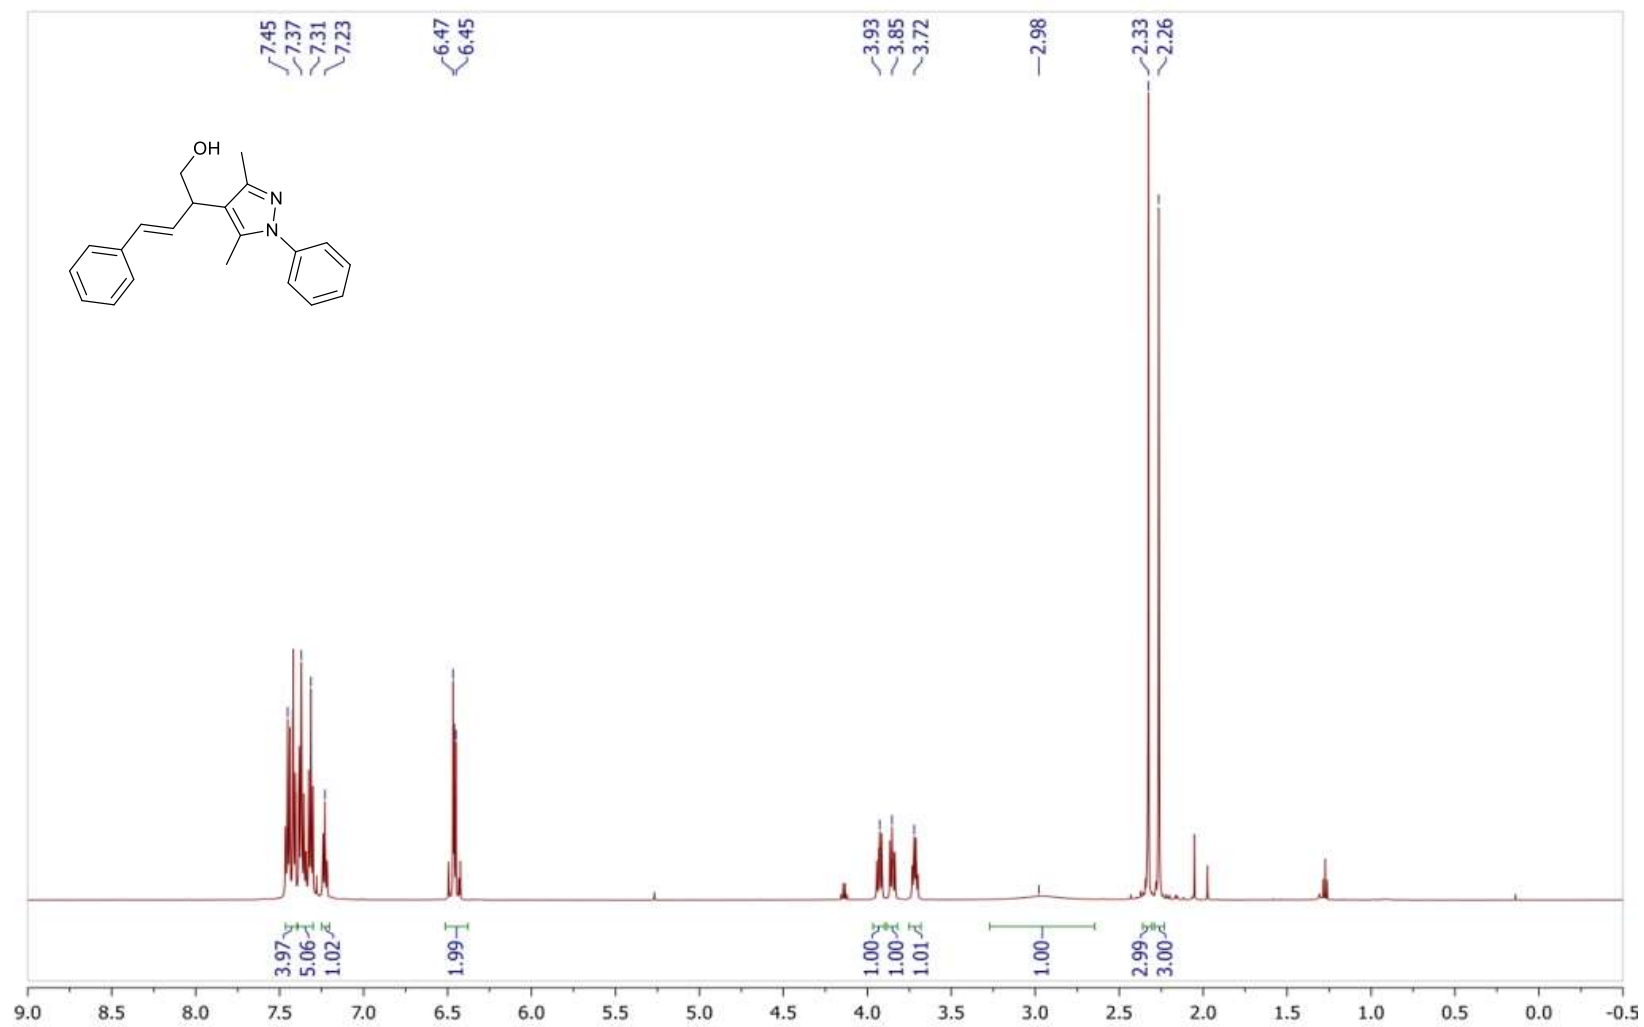



*(E)*-2-(3,5-Dimethyl-1-phenyl-1H-pyrazol-4-yl)-4-phenylbut-3-en-1-ol (**3q**)

$^{13}\text{C}$  NMR ( $\text{CDCl}_3$ , 150 MHz)

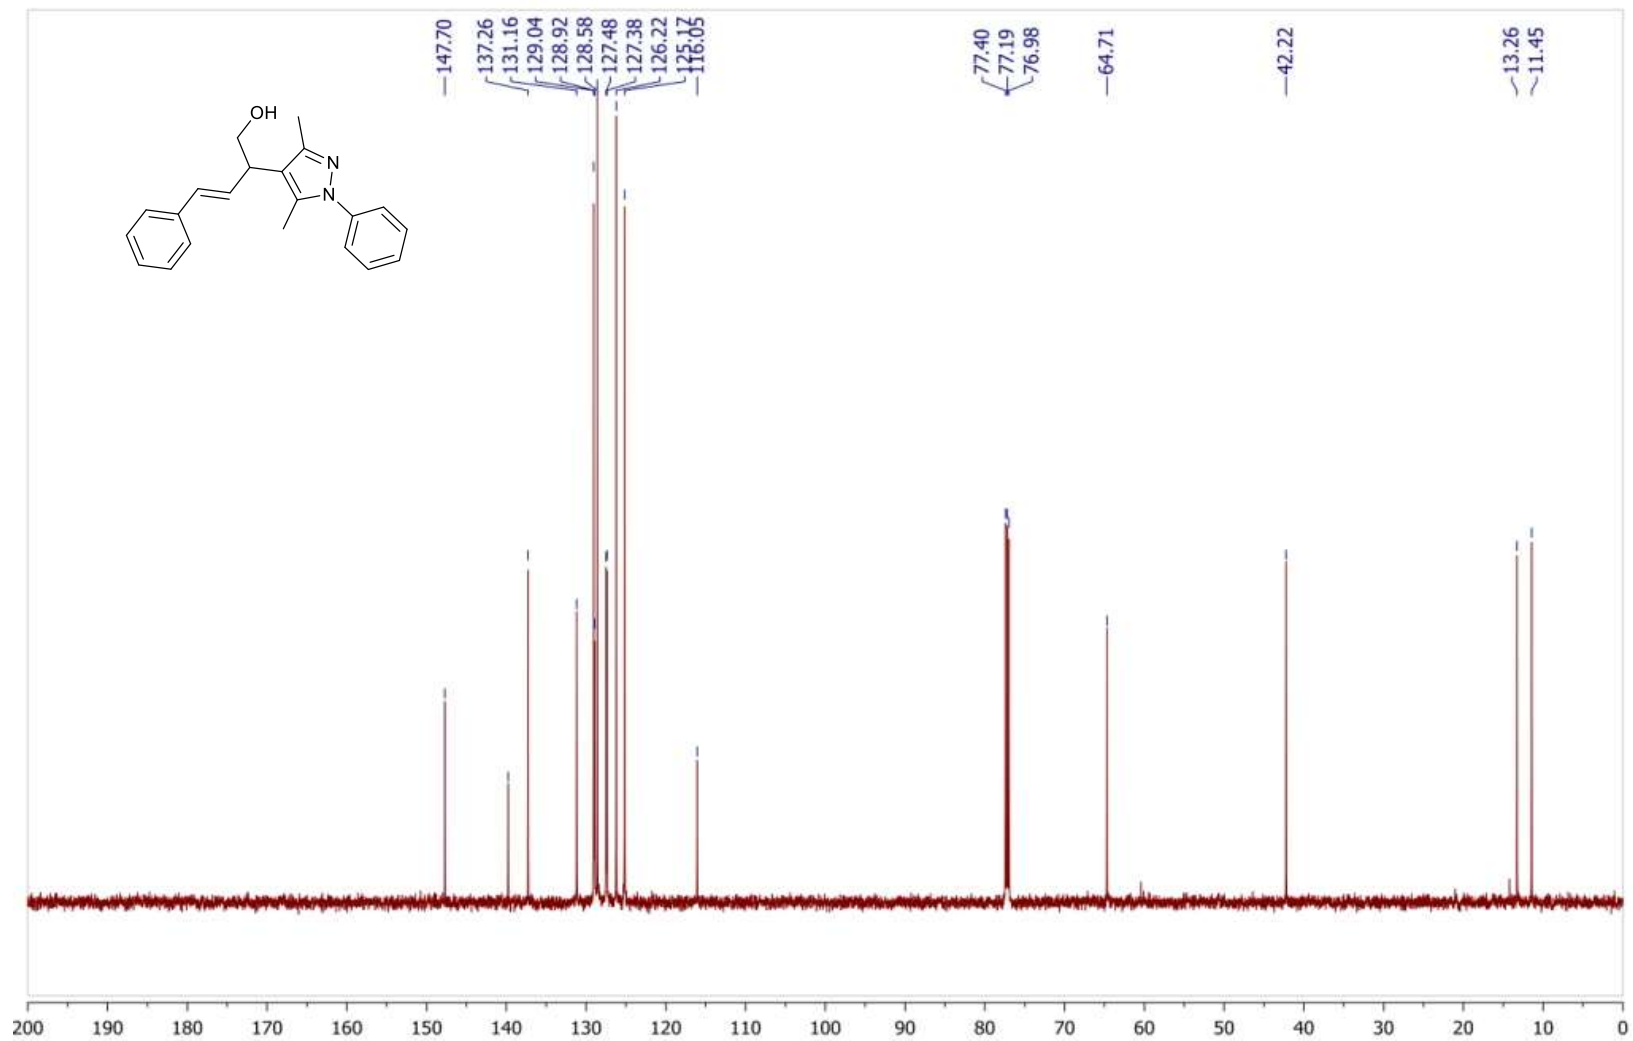

*2-Phenyl-2-(1,3,5-triphenyl-1H-pyrazol-4-yl)ethanol (3r)*

<sup>1</sup>H NMR (CDCl<sub>3</sub>, 600 MHz)

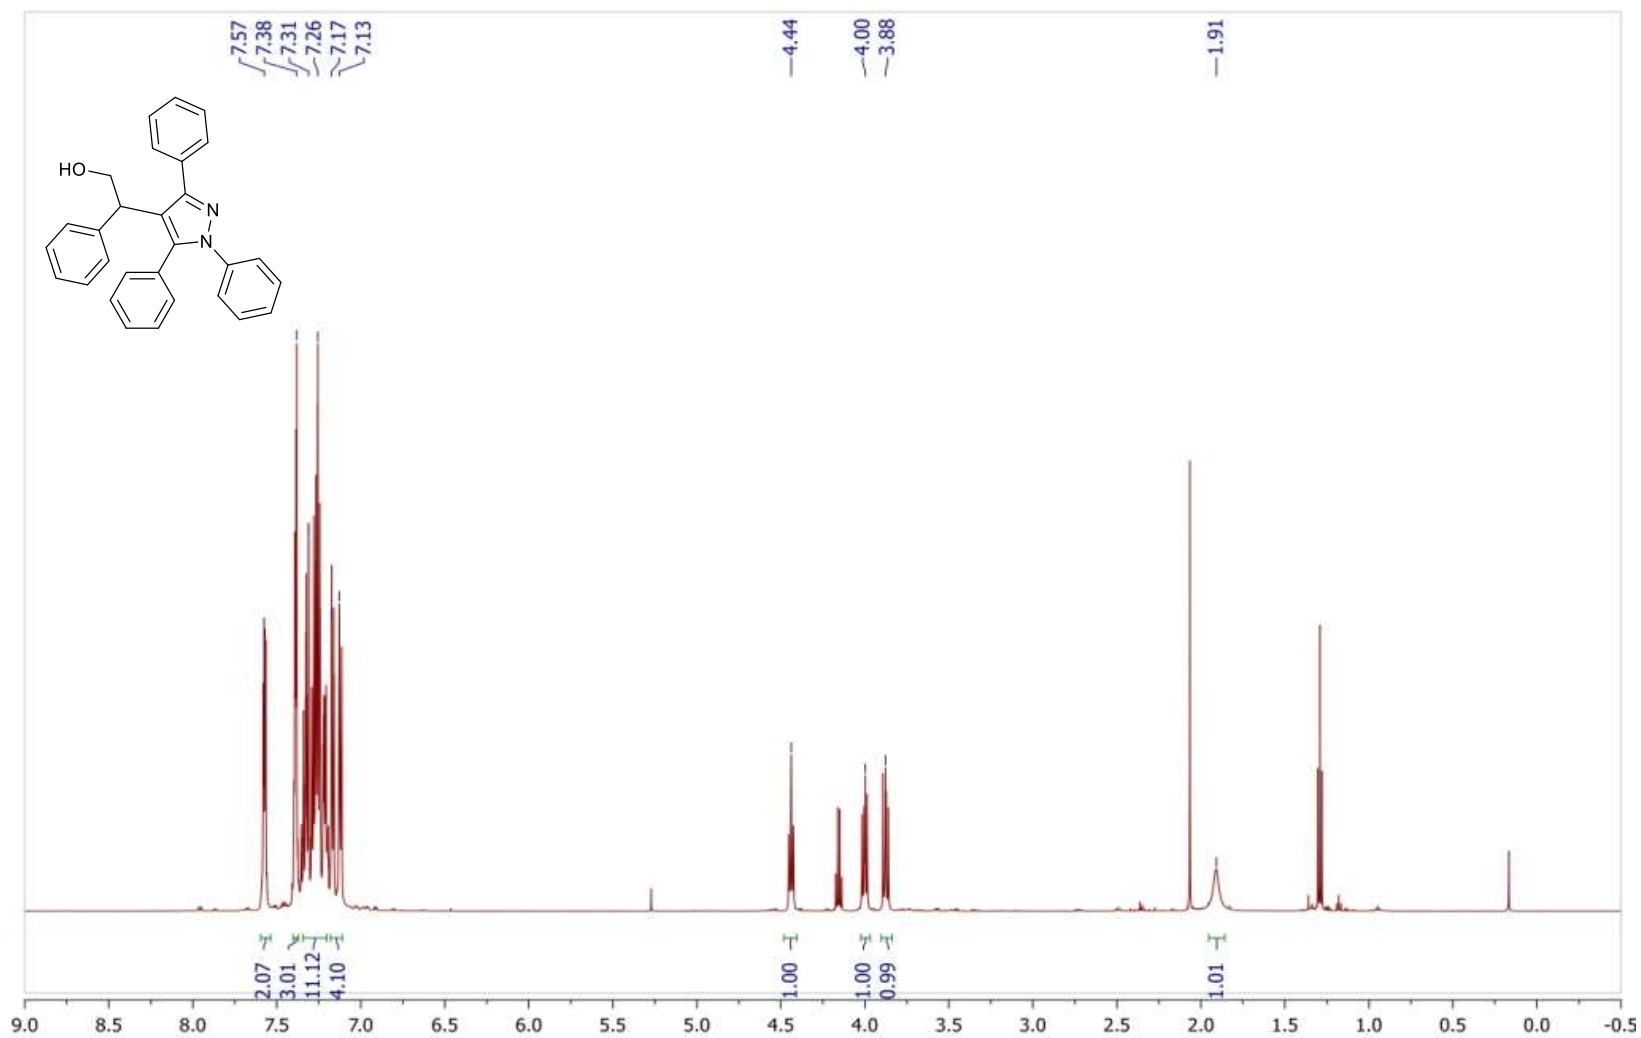

*2-Phenyl-2-(1,3,5-triphenyl-1H-pyrazol-4-yl)ethanol (3r)*

$^{13}\text{C}$  NMR ( $\text{CDCl}_3$ , 150 MHz)

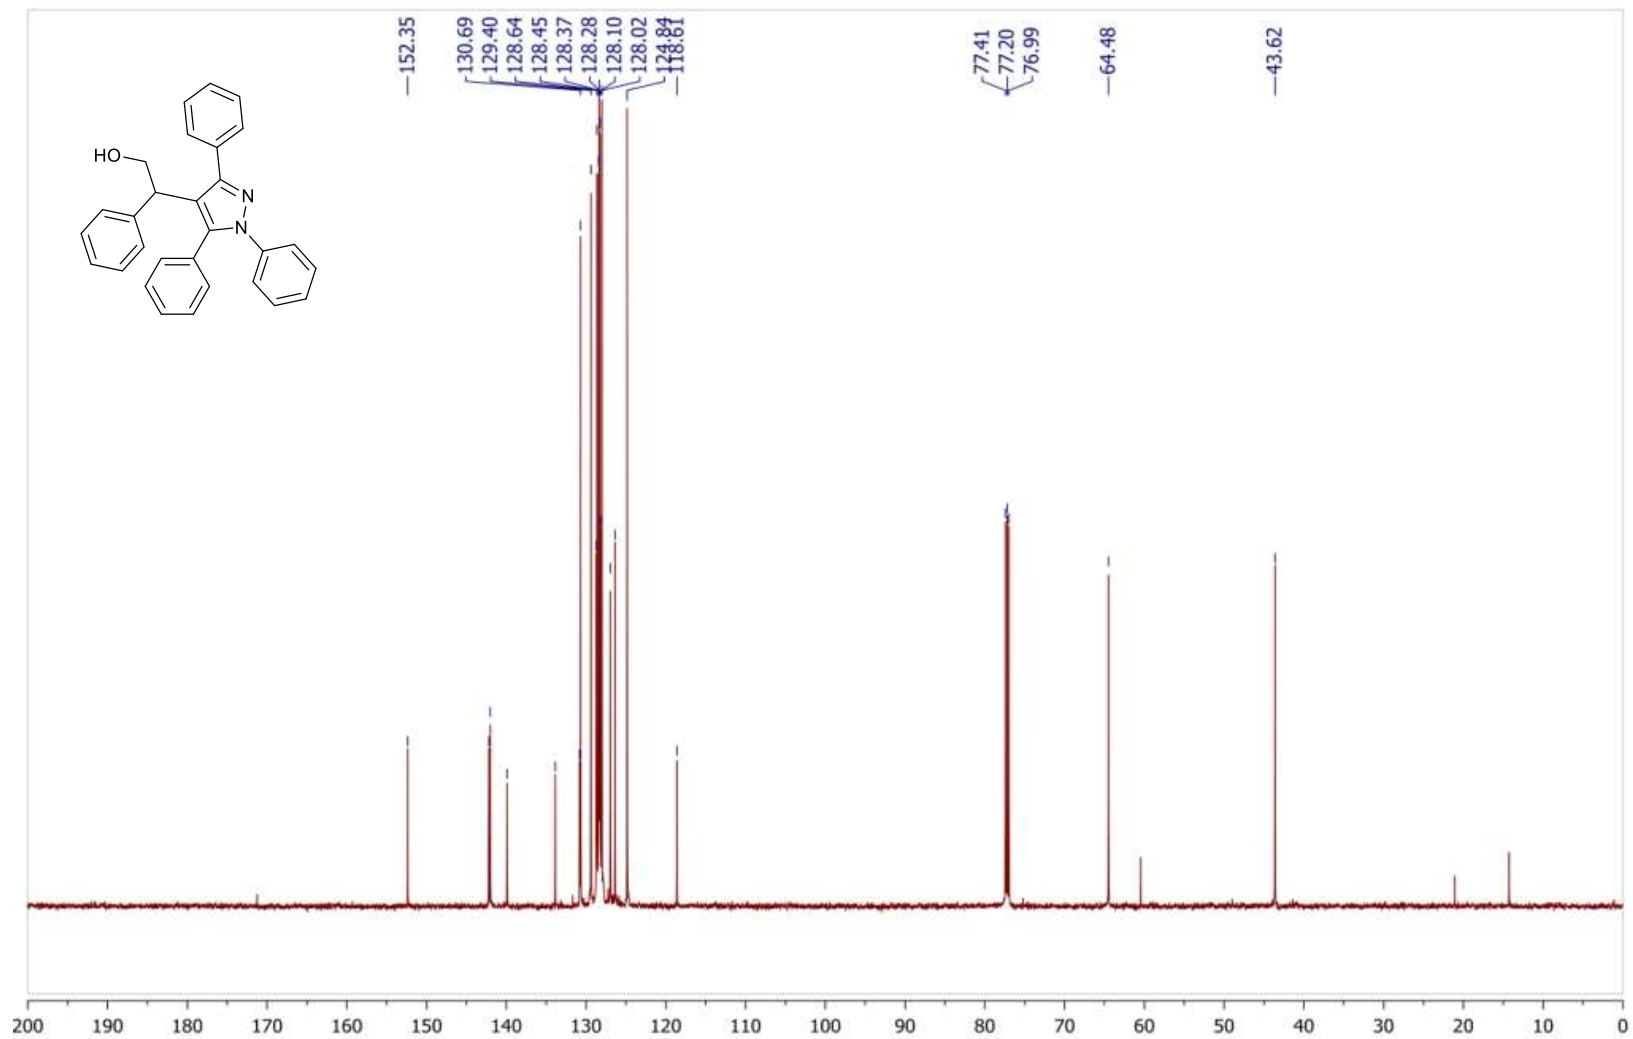

*2-(3,5-Dimethylisoxazol-4-yl)-2-phenylethanol (4a)*

$^1\text{H}$  NMR ( $\text{CDCl}_3$ , 600 MHz)

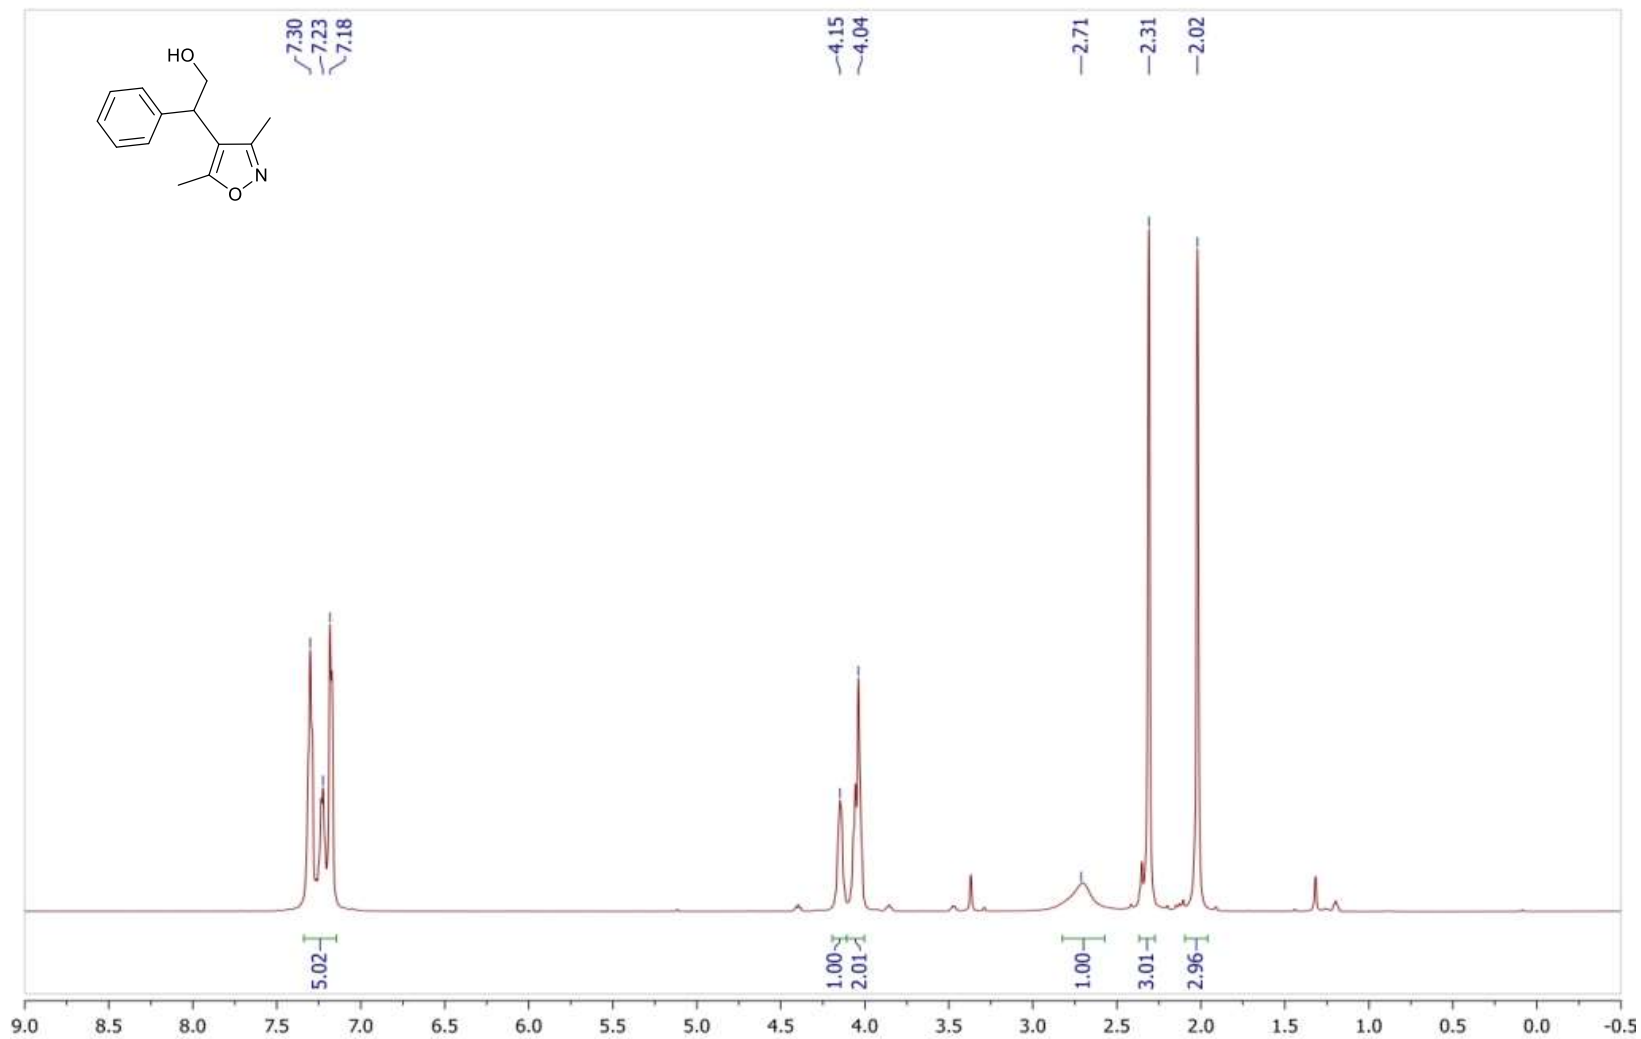

*2-(3,5-Dimethylisoxazol-4-yl)-2-phenylethanol (4a)*

$^{13}\text{C}$  NMR ( $\text{CDCl}_3$ , 150 MHz)

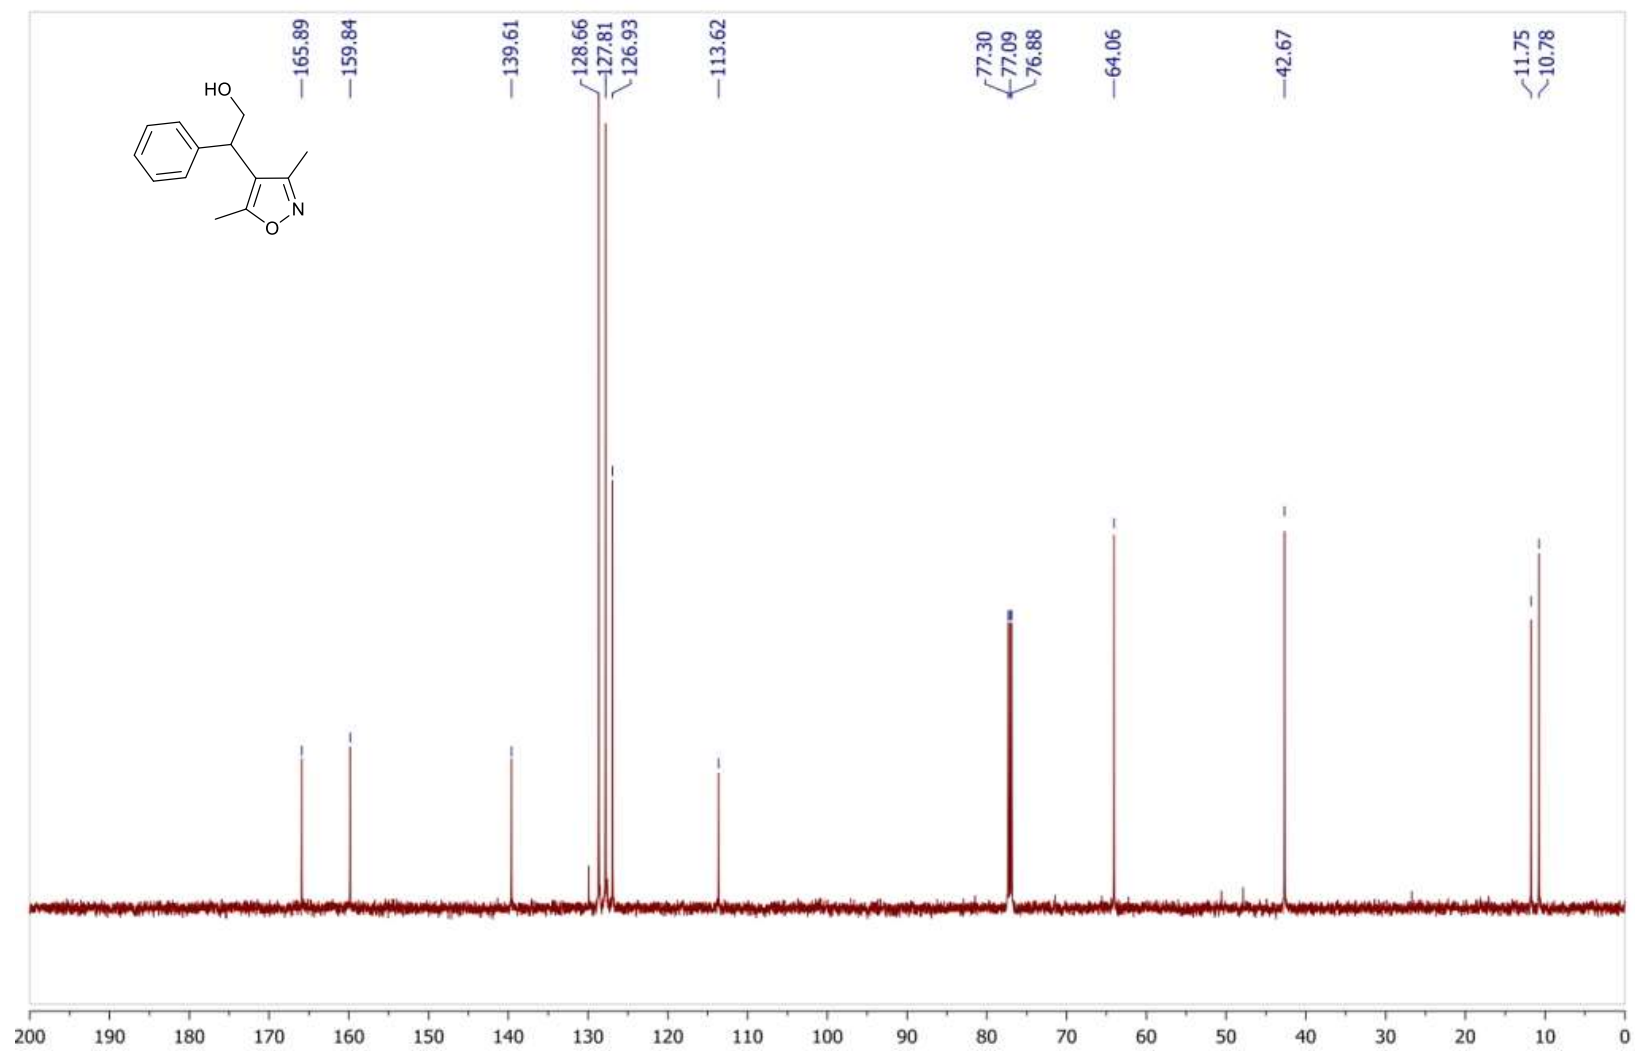

*2-[4-(Dimethylamino)phenyl]-2-(3,5-dimethylisoxazol-4-yl)ethanol (4b)*

<sup>1</sup>H NMR (CDCl<sub>3</sub>, 600 MHz)

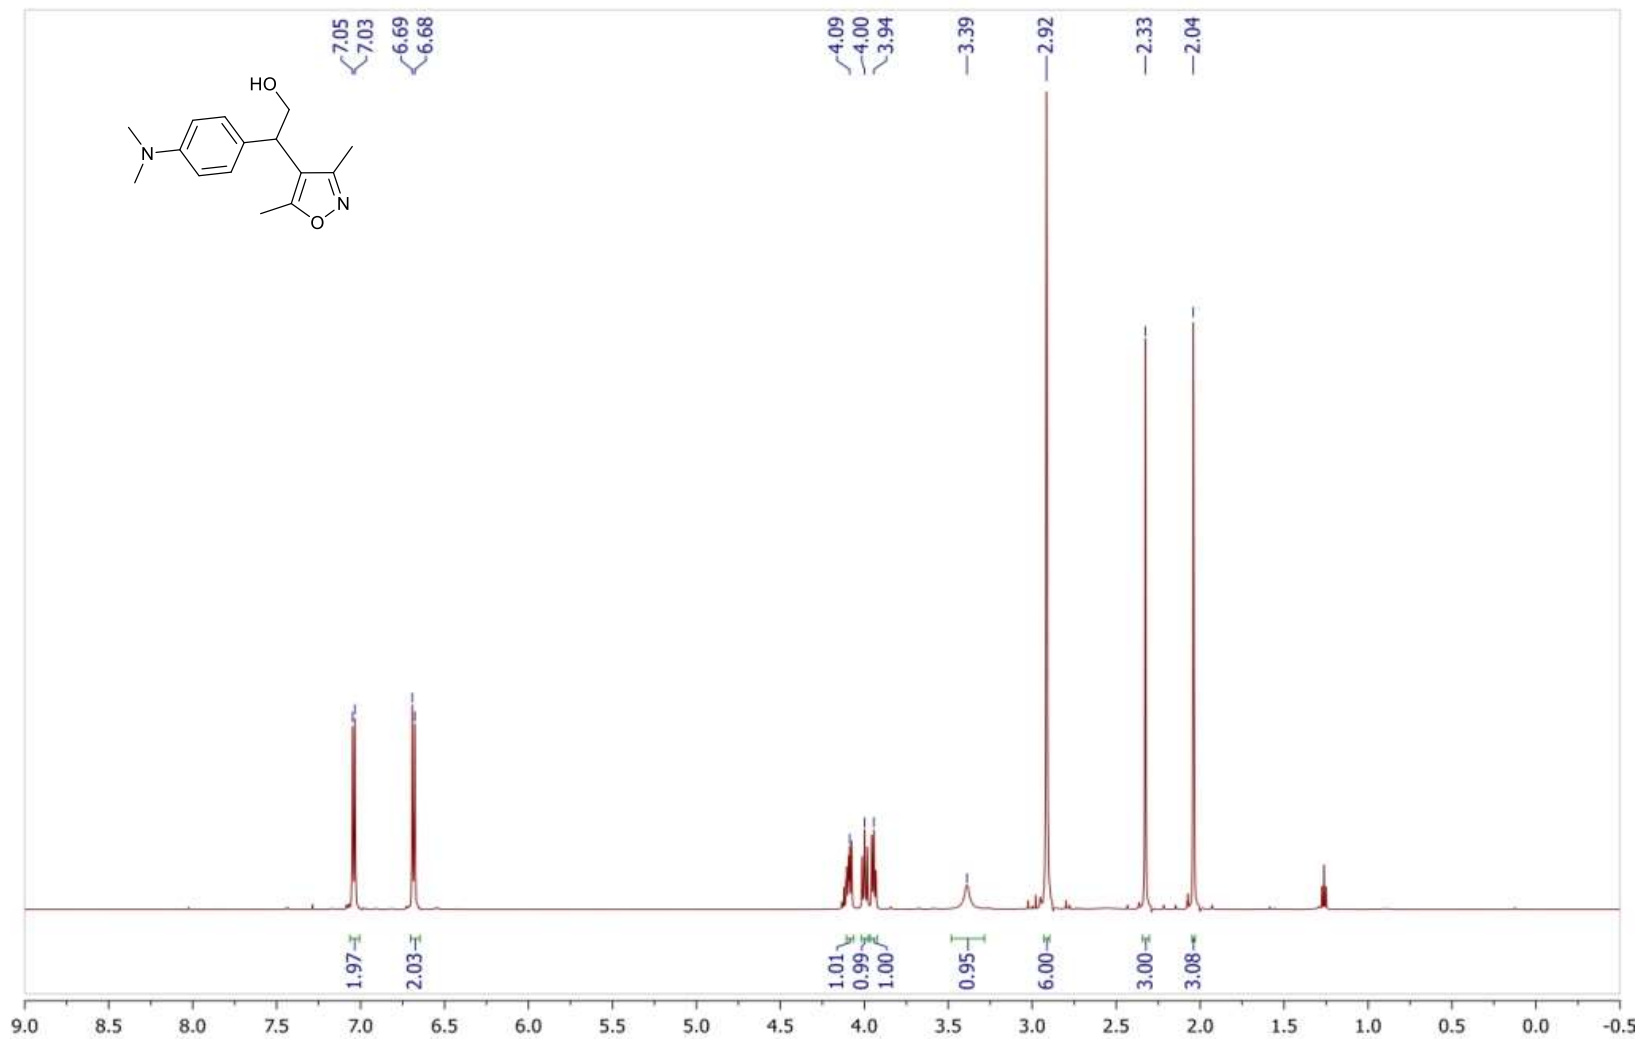

*2-[4-(Dimethylamino)phenyl]-2-(3,5-dimethylisoxazol-4-yl)ethanol (4b)*

$^{13}\text{C}$  NMR ( $\text{CDCl}_3$ , 150 MHz)

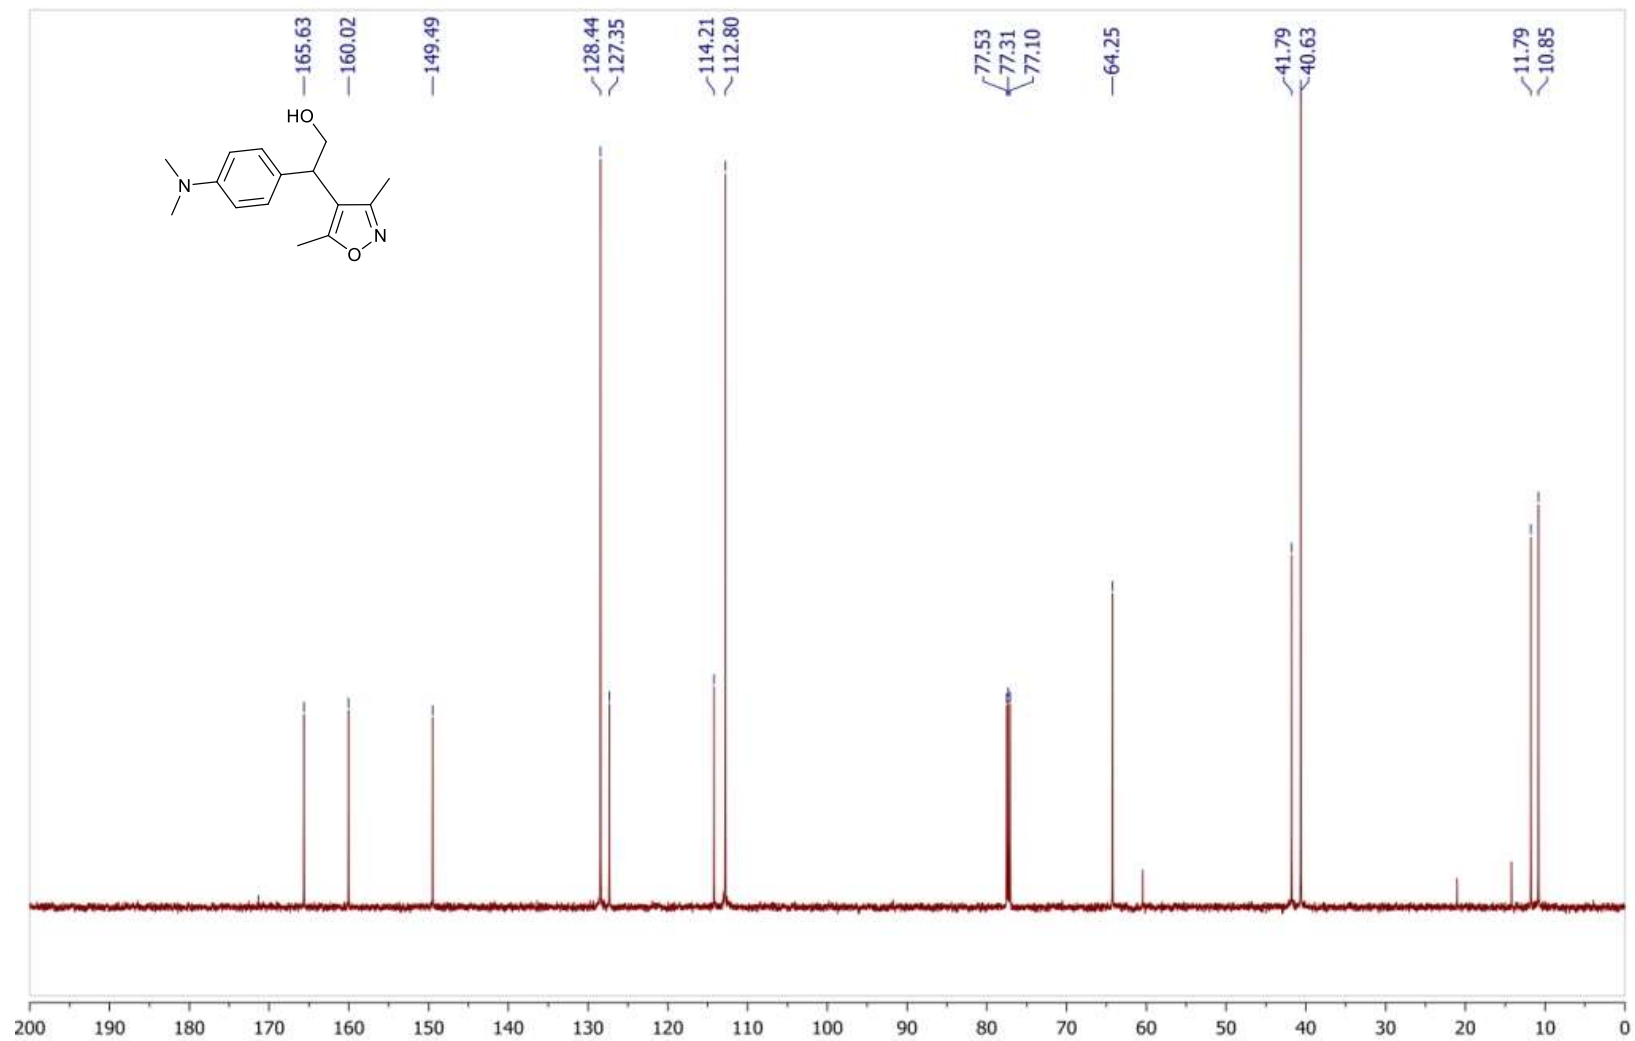

*2-(3,5-Dimethylisoxazol-4-yl)-2-(3,4,5-trimethoxyphenyl)ethanol (4c)*

$^1\text{H}$  NMR ( $\text{CDCl}_3$ , 600 MHz)

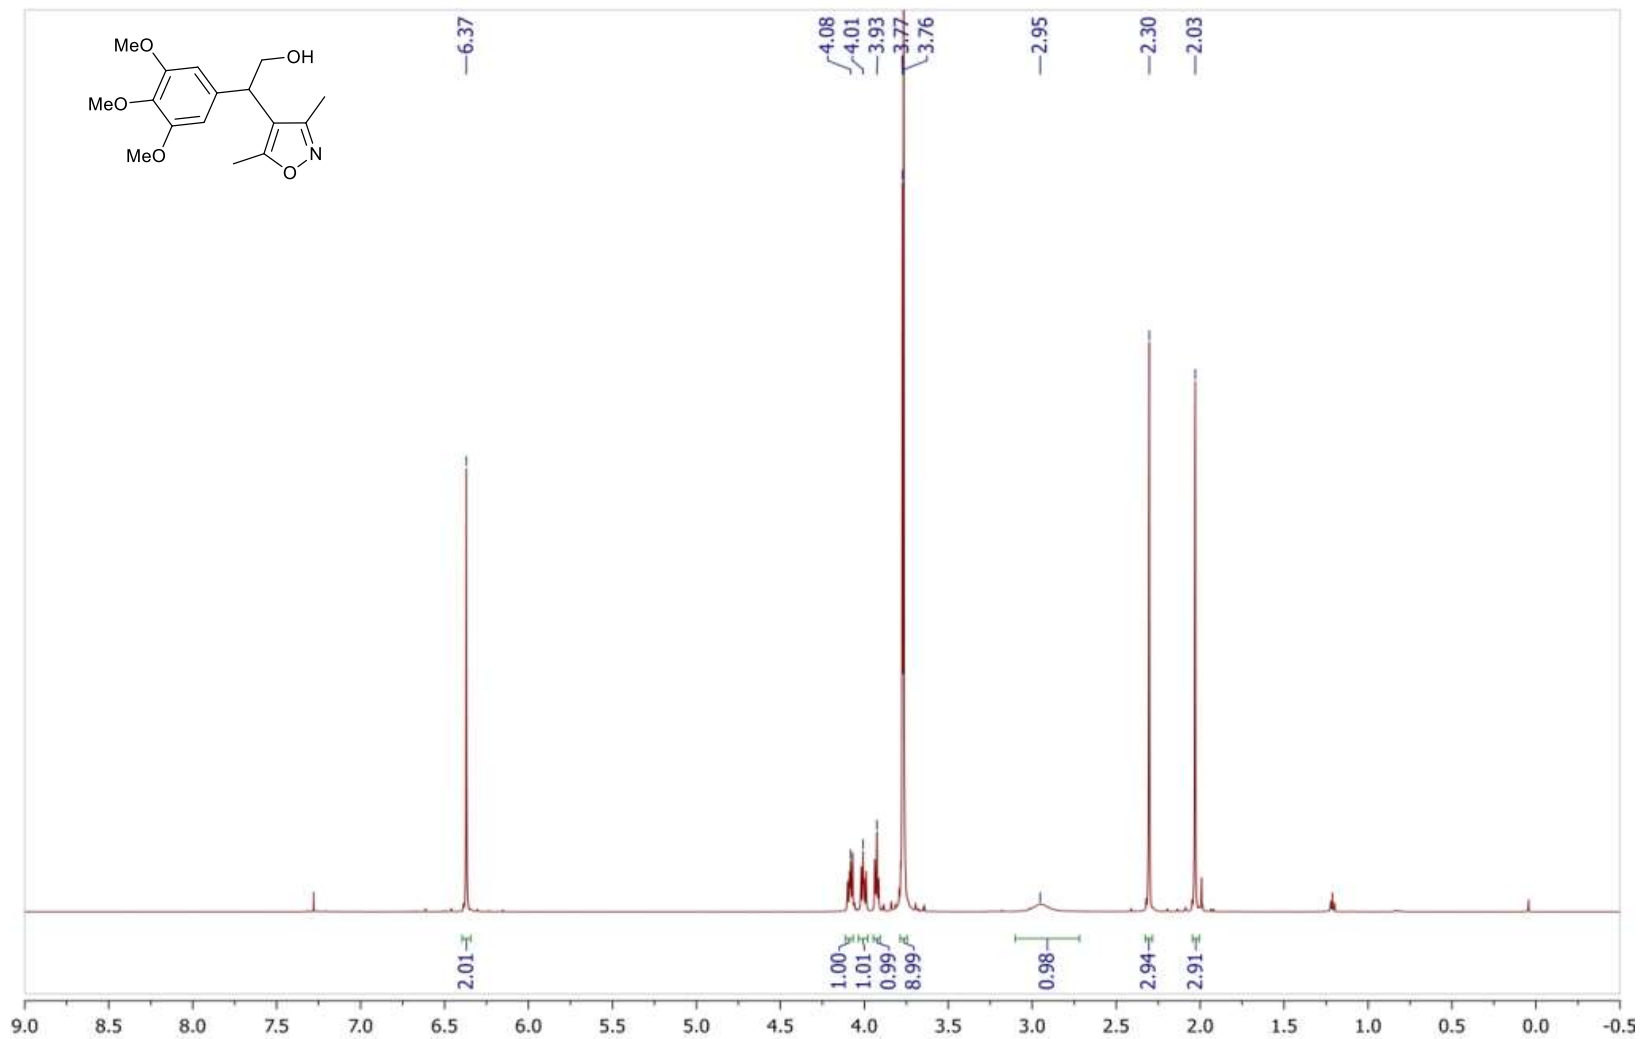



*2-(3,5-Dimethylisoxazol-4-yl)-2-(3,4,5-trimethoxyphenyl)ethanol (4c)*

$^{13}\text{C}$  NMR ( $\text{CDCl}_3$ , 150 MHz)

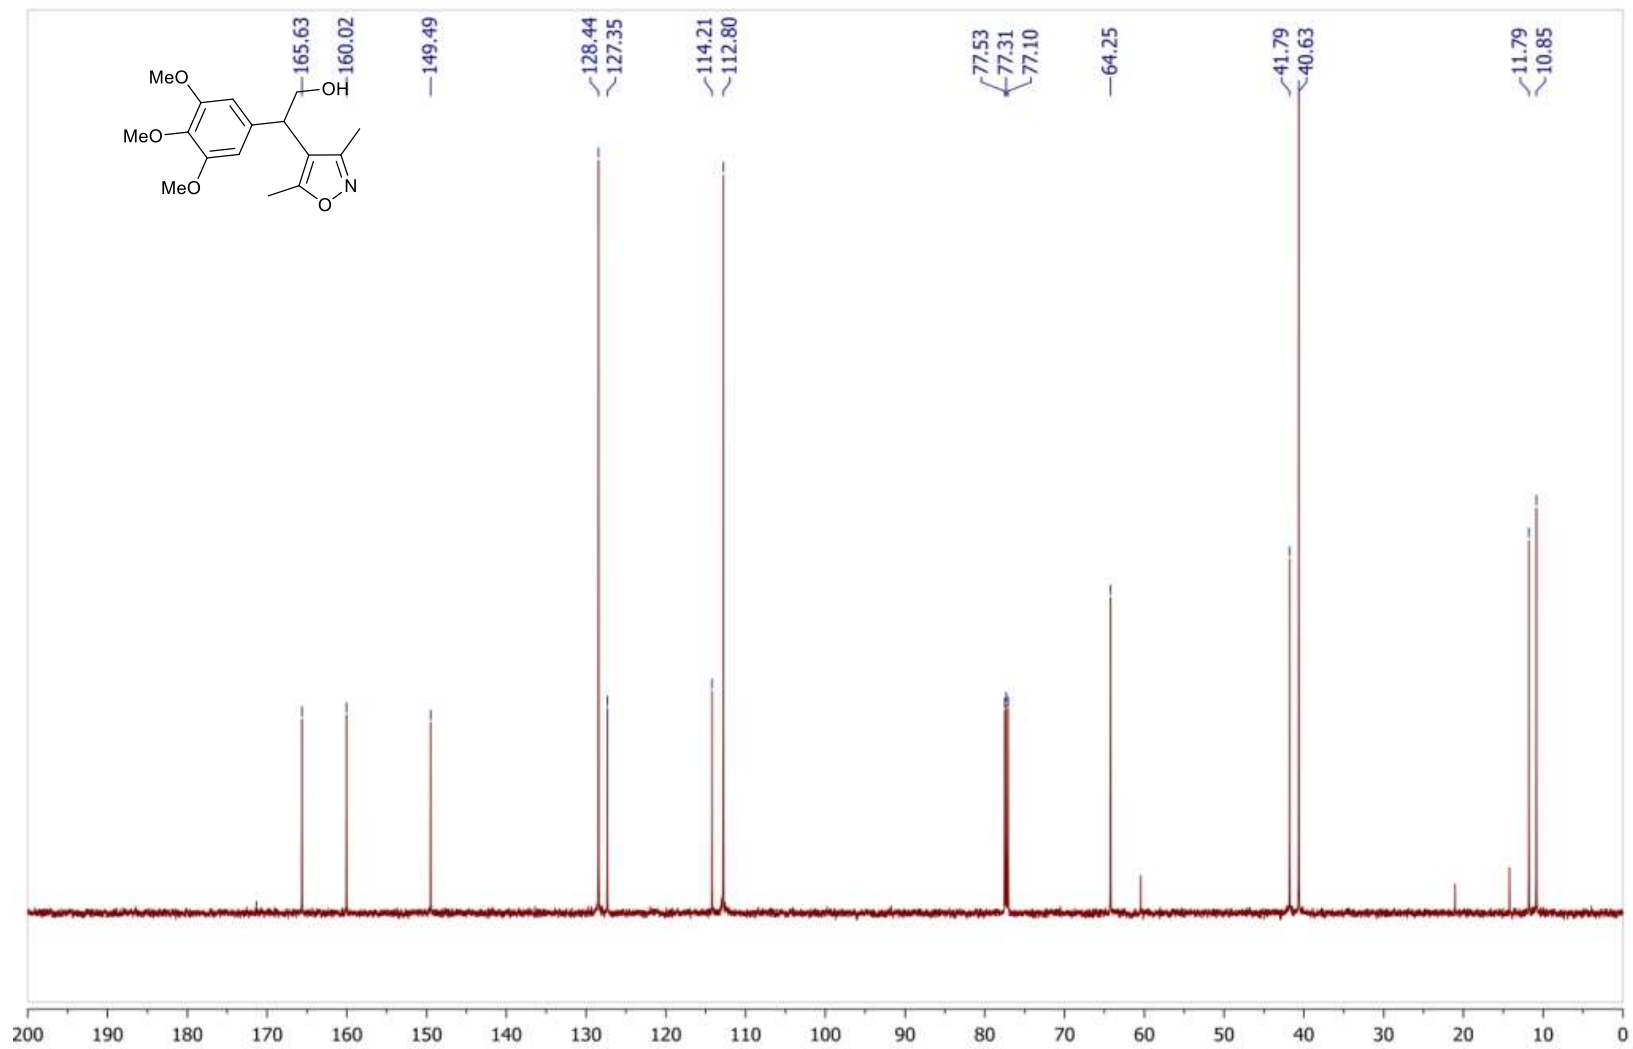

*2-(3,5-Dimethylisoxazol-4-yl)-2-(thiophen-2-yl)ethanol (4d)*

<sup>1</sup>H NMR (CDCl<sub>3</sub>, 600 MHz)

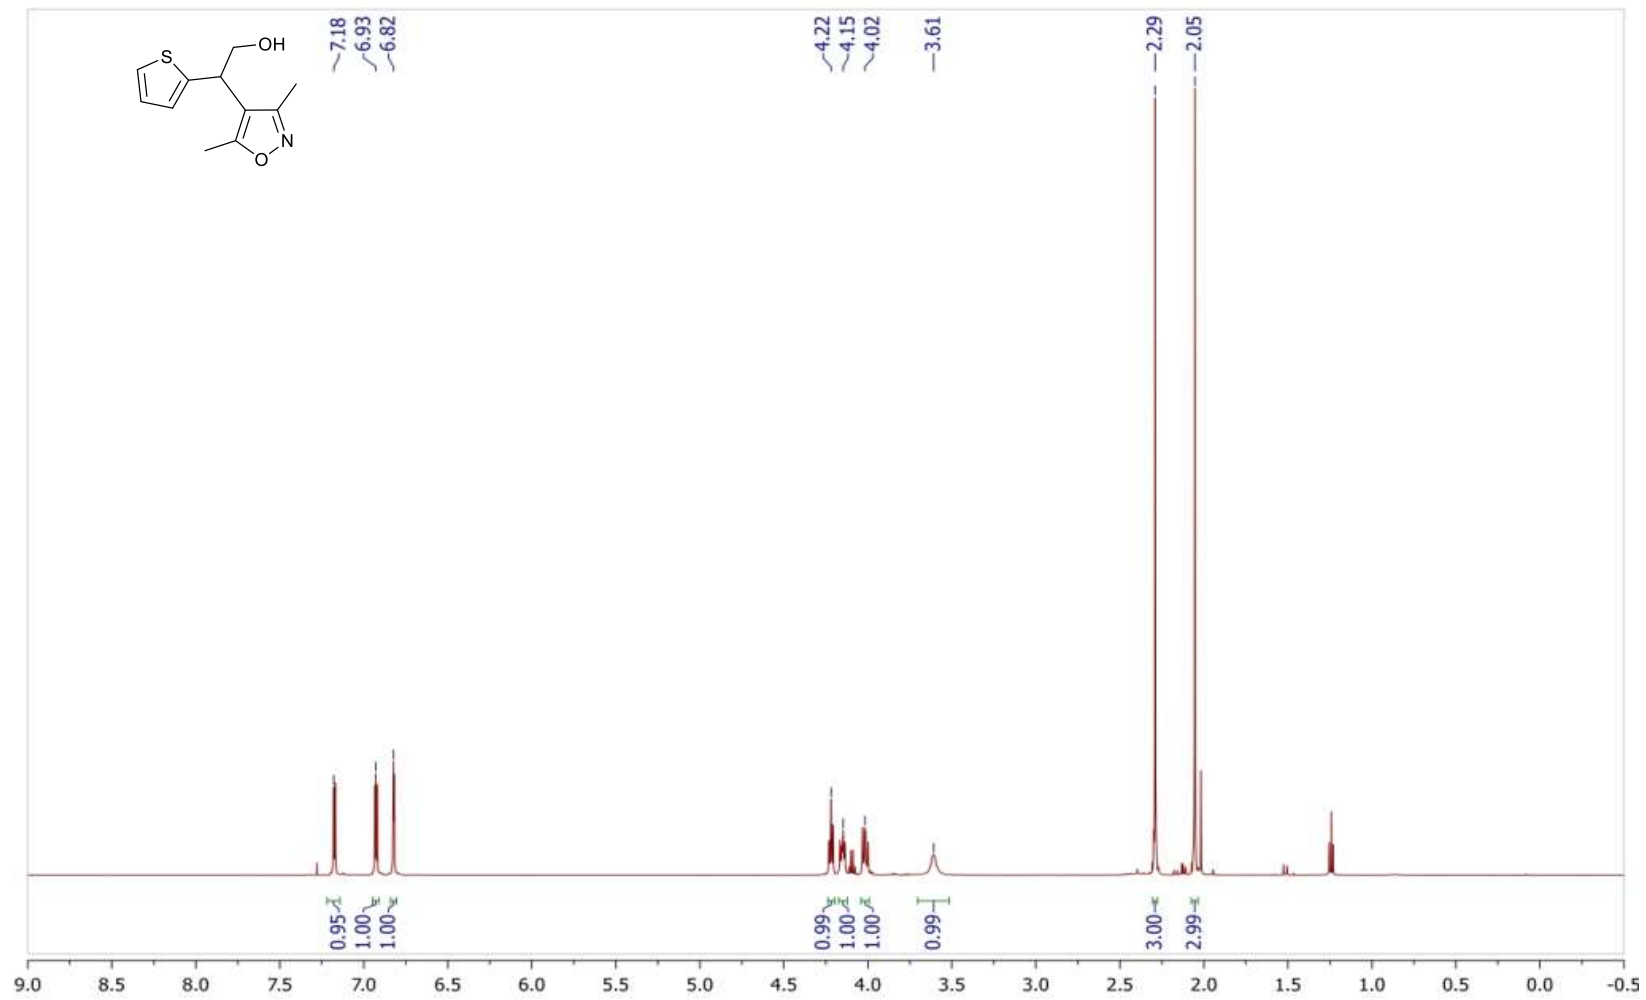

*2-(3,5-Dimethylisoxazol-4-yl)-2-(thiophen-2-yl)ethanol (4d)*

$^{13}\text{C}$  NMR ( $\text{CDCl}_3$ , 150 MHz)

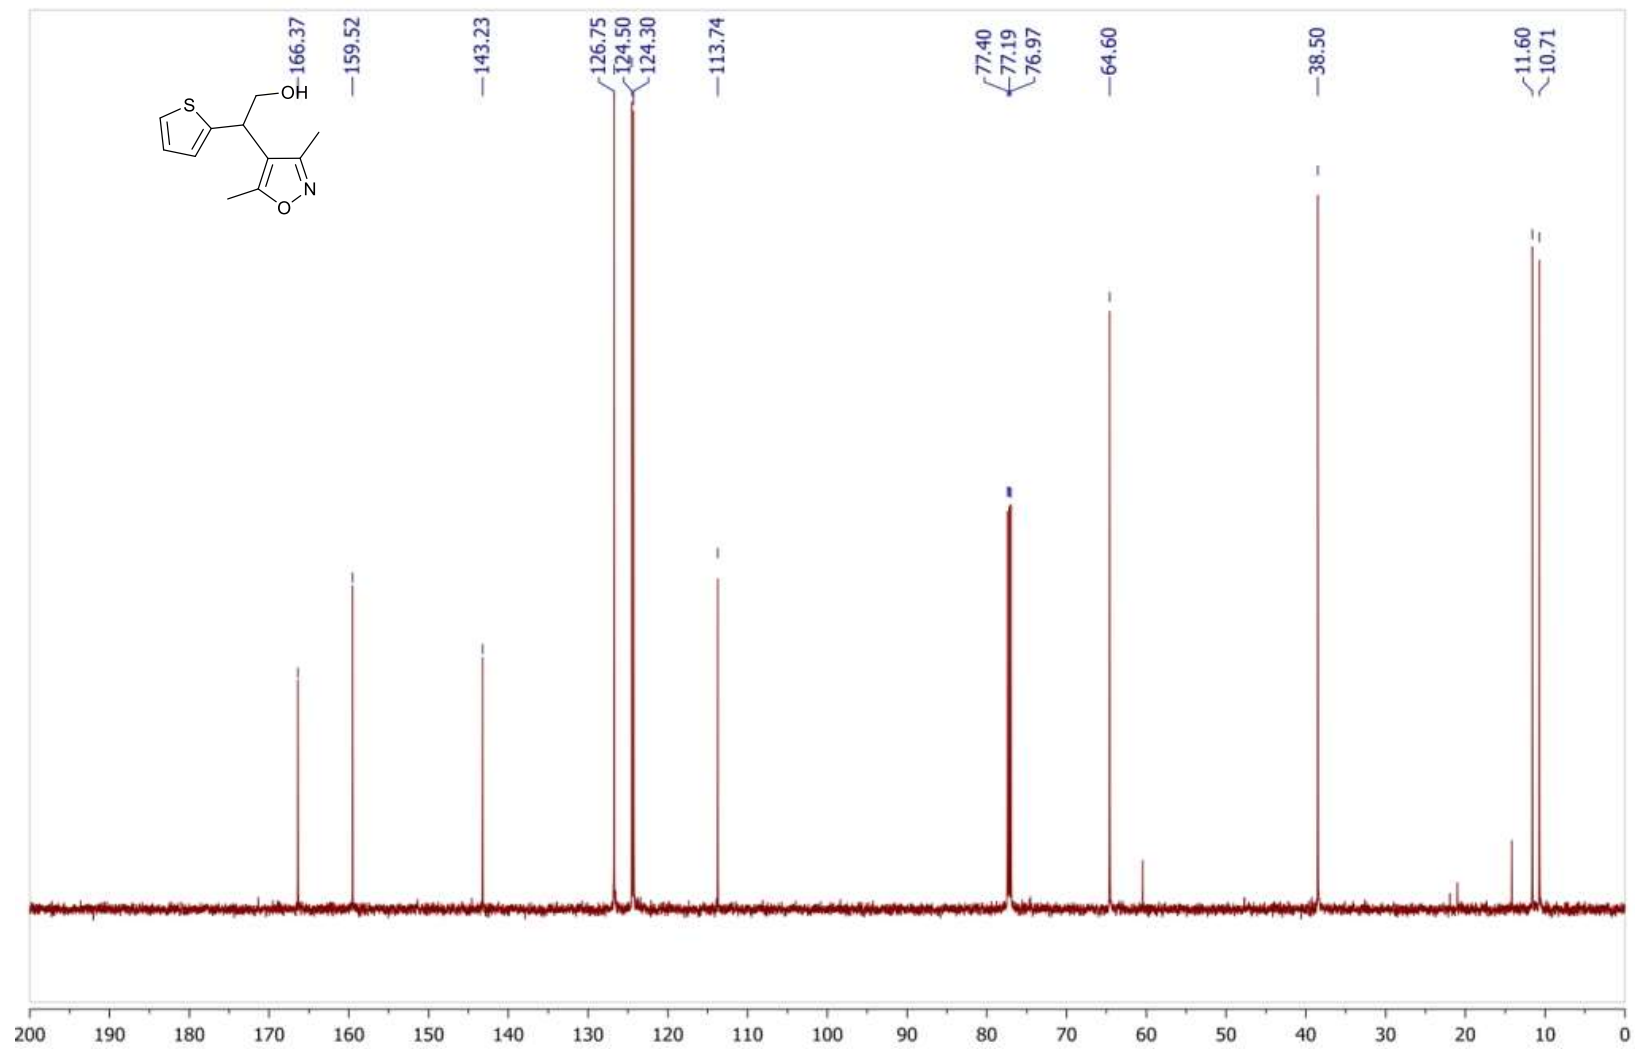

*(E)*-2-(3,5-Dimethylisoxazol-4-yl)-4-phenylbut-3-en-1-ol (*4e*)

<sup>1</sup>H NMR (CDCl<sub>3</sub>, 600 MHz)

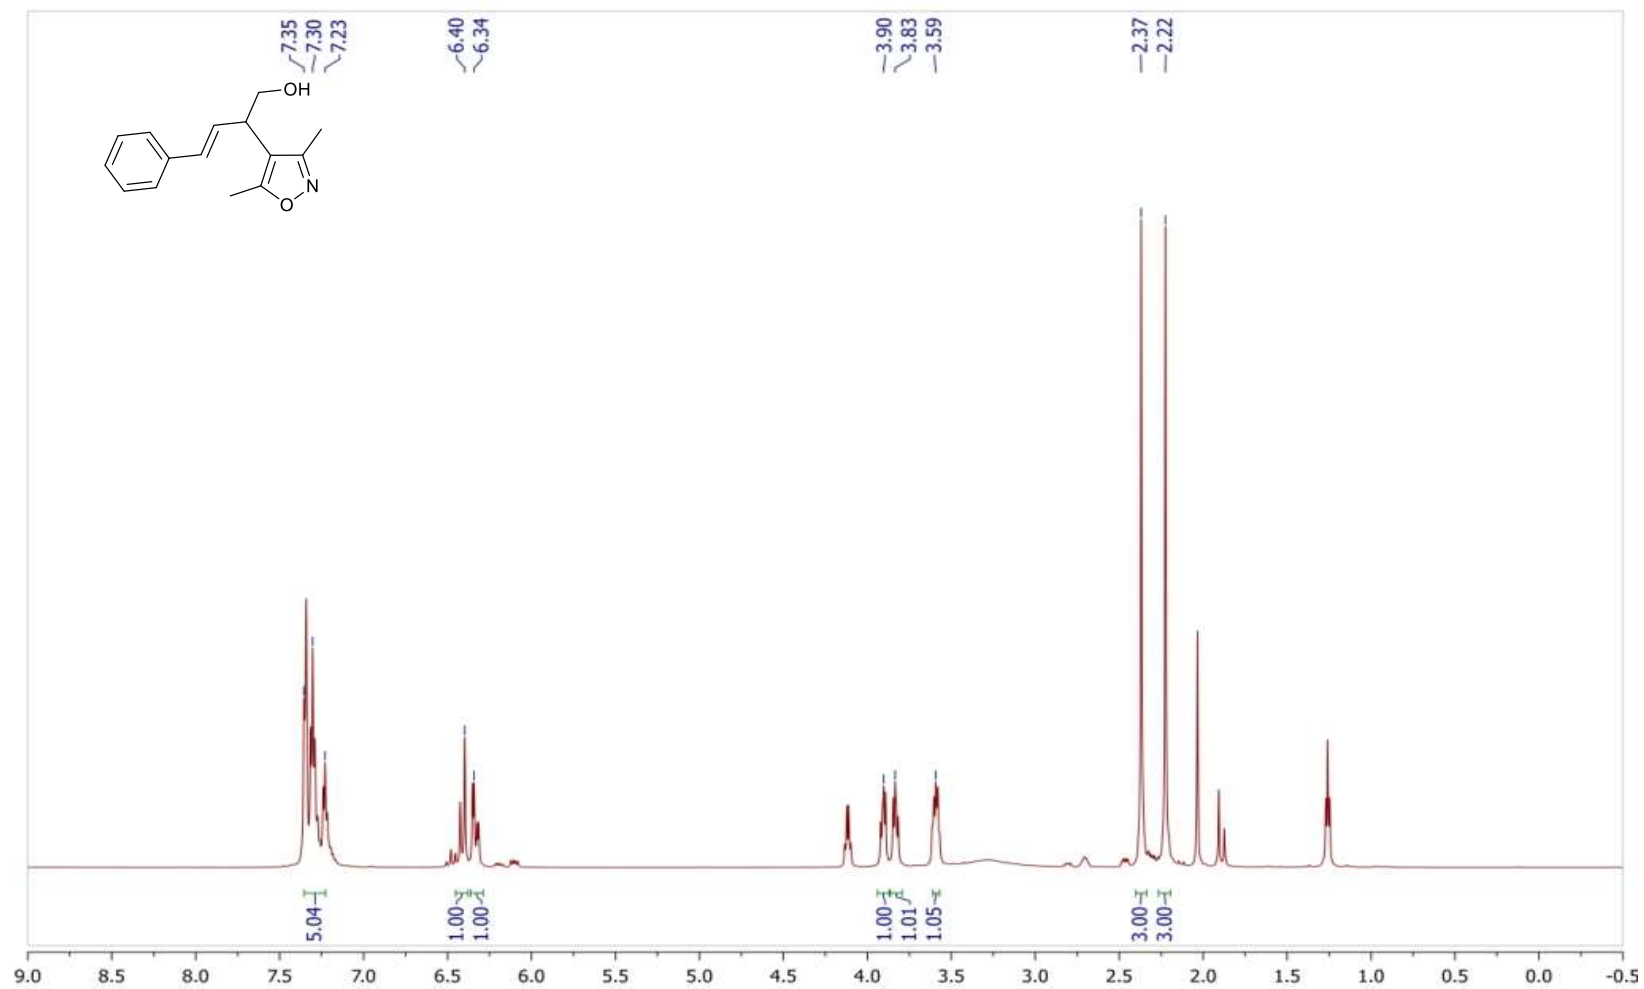

*(E)*-2-(3,5-Dimethylisoxazol-4-yl)-4-phenylbut-3-en-1-ol (*4e*)

$^{13}\text{C}$  NMR ( $\text{CDCl}_3$ , 150 MHz)

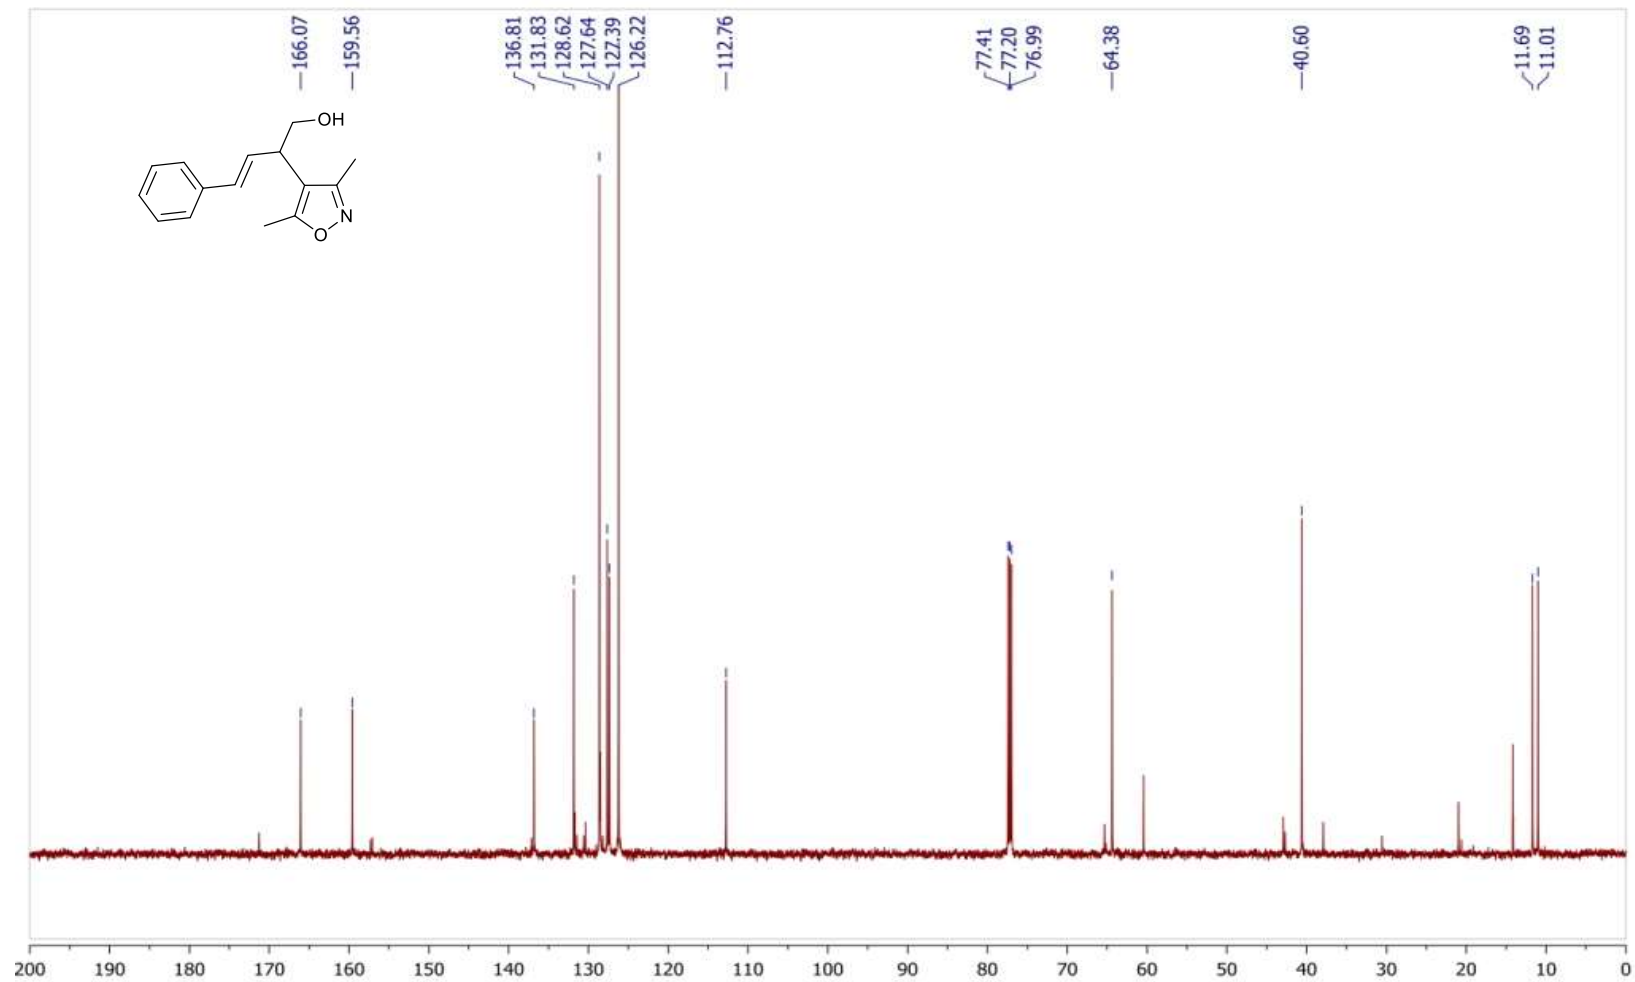

*4-Oxo-2,4-diphenylbutyl benzoate (6)*

<sup>1</sup>H NMR (CDCl<sub>3</sub>, 600 MHz)

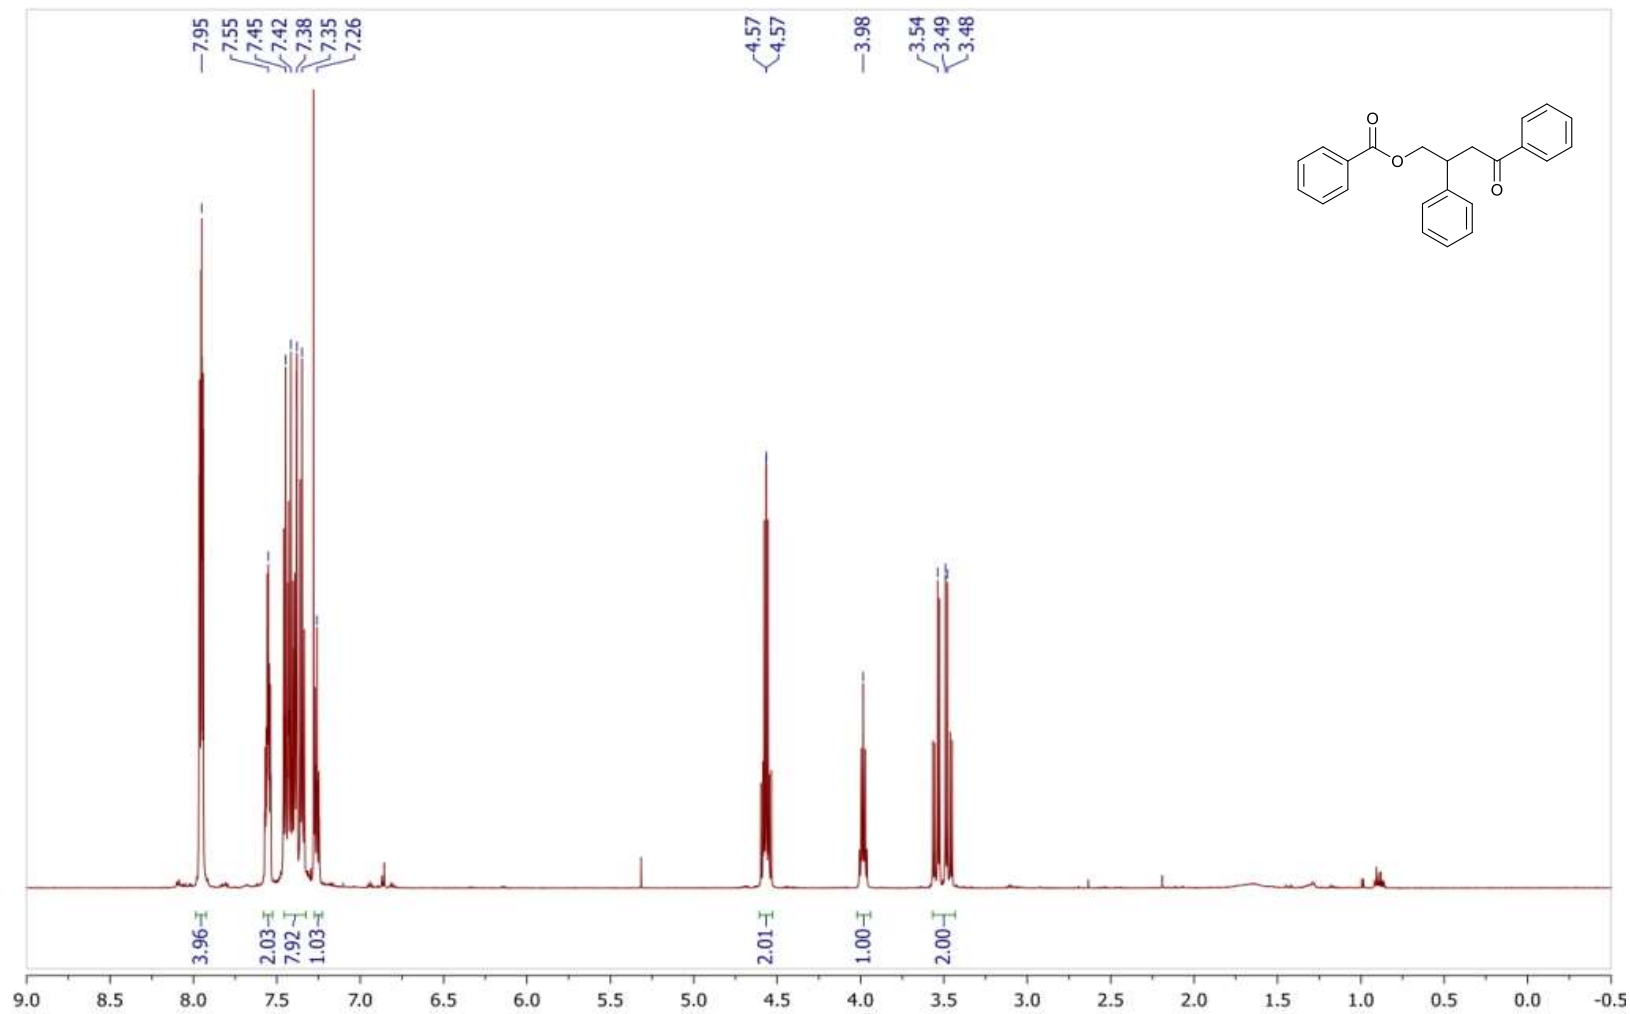

*4-Oxo-2,4-diphenylbutyl benzoate (6)*

$^{13}\text{C}$  NMR ( $\text{CDCl}_3$ , 150 MHz)

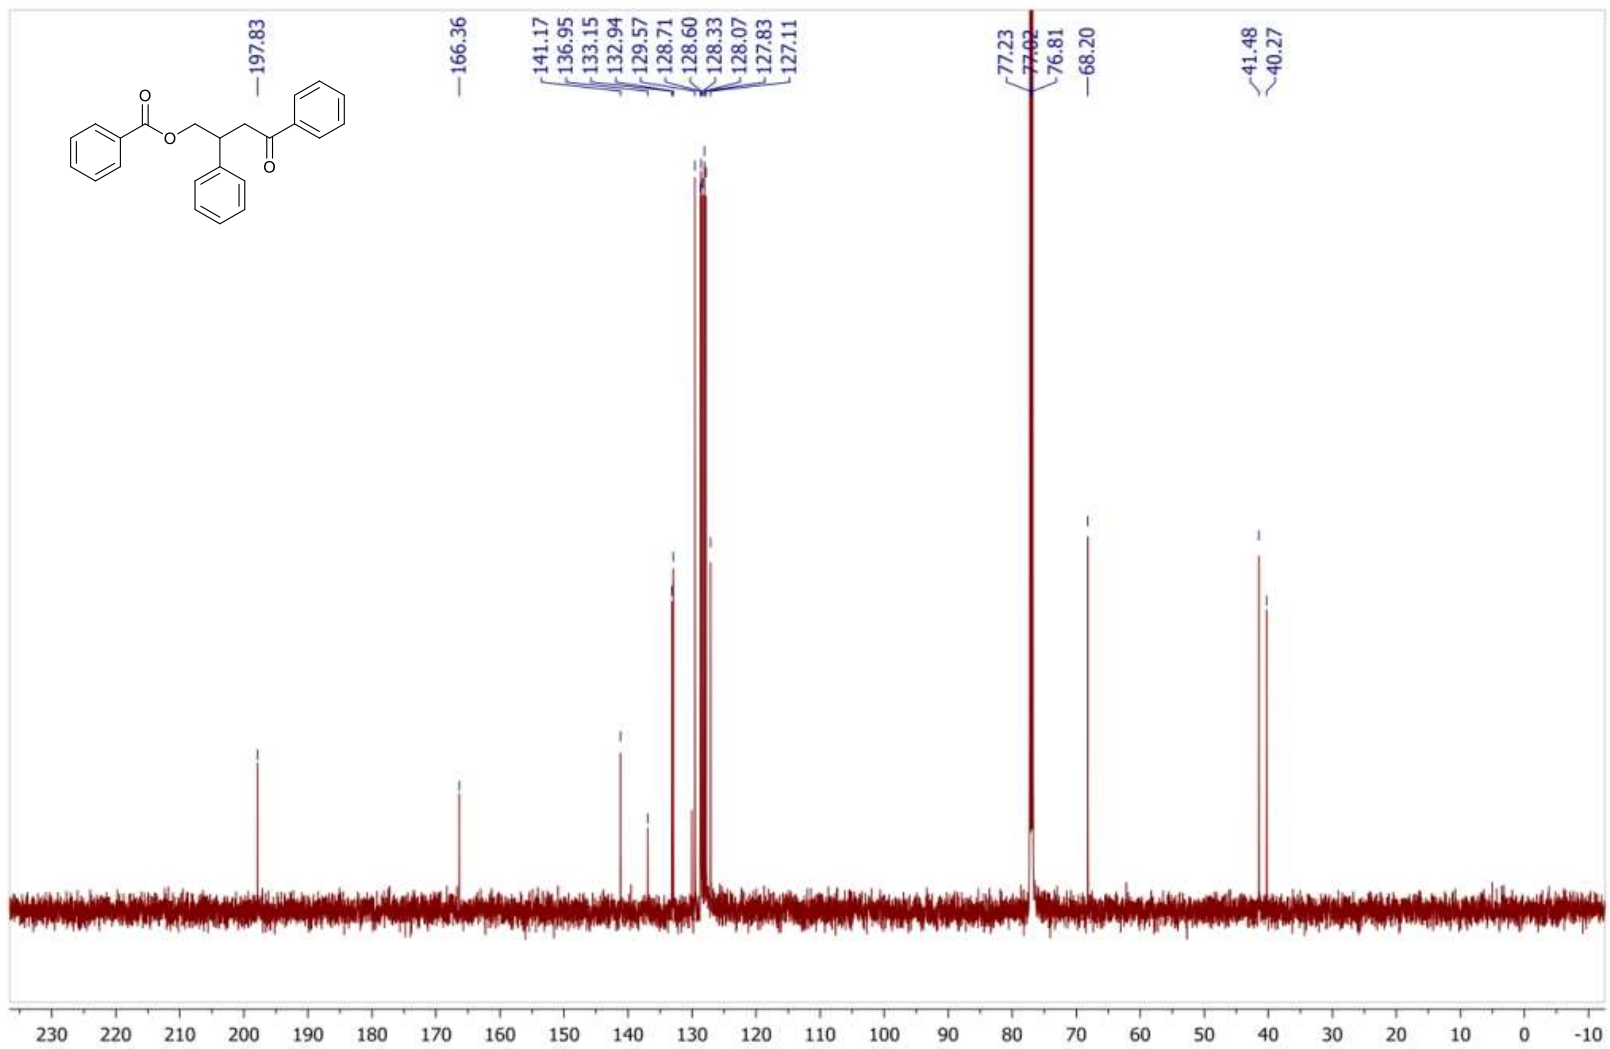

*2-(3,4-Dimethoxyphenyl)-2-(3,5-dimethyl-1-phenyl-1H-pyrazol-4-yl)ethylamine (7)*

<sup>1</sup>H NMR (CDCl<sub>3</sub>, 600 MHz)

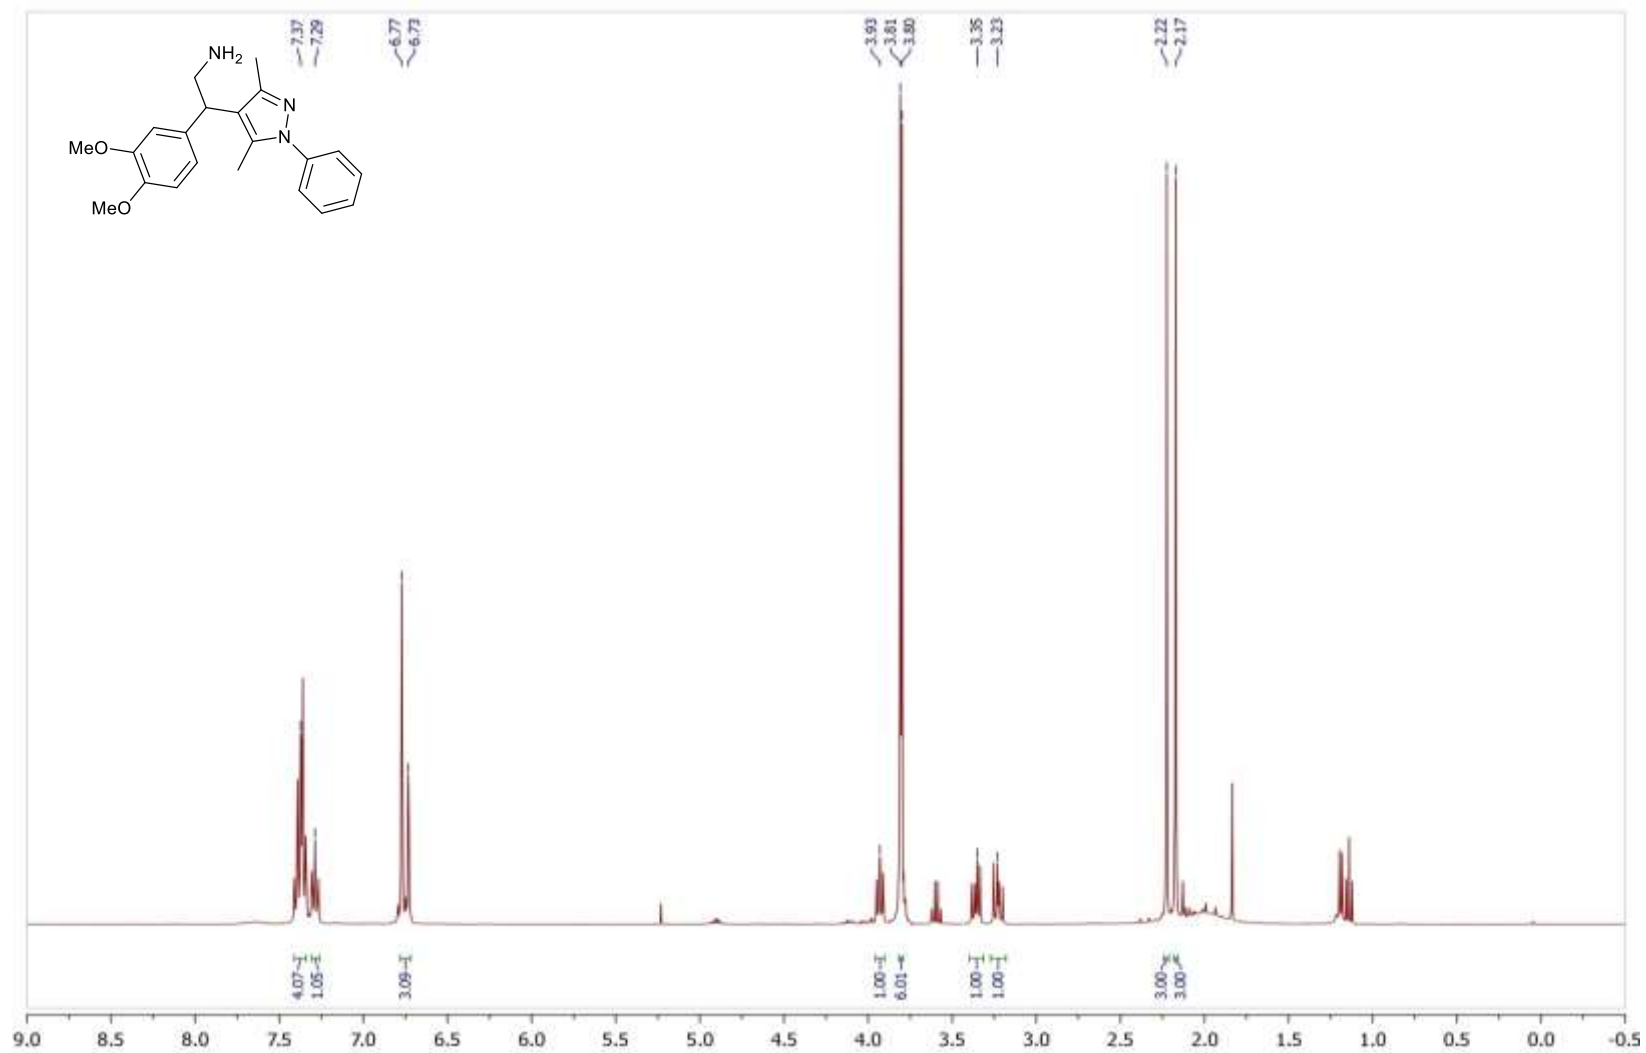



*2-(3,4-Dimethoxyphenyl)-2-(3,5-dimethyl-1-phenyl-1H-pyrazol-4-yl)ethylamine (7)*

$^{13}\text{C}$  NMR ( $\text{CDCl}_3$ , 150 MHz)

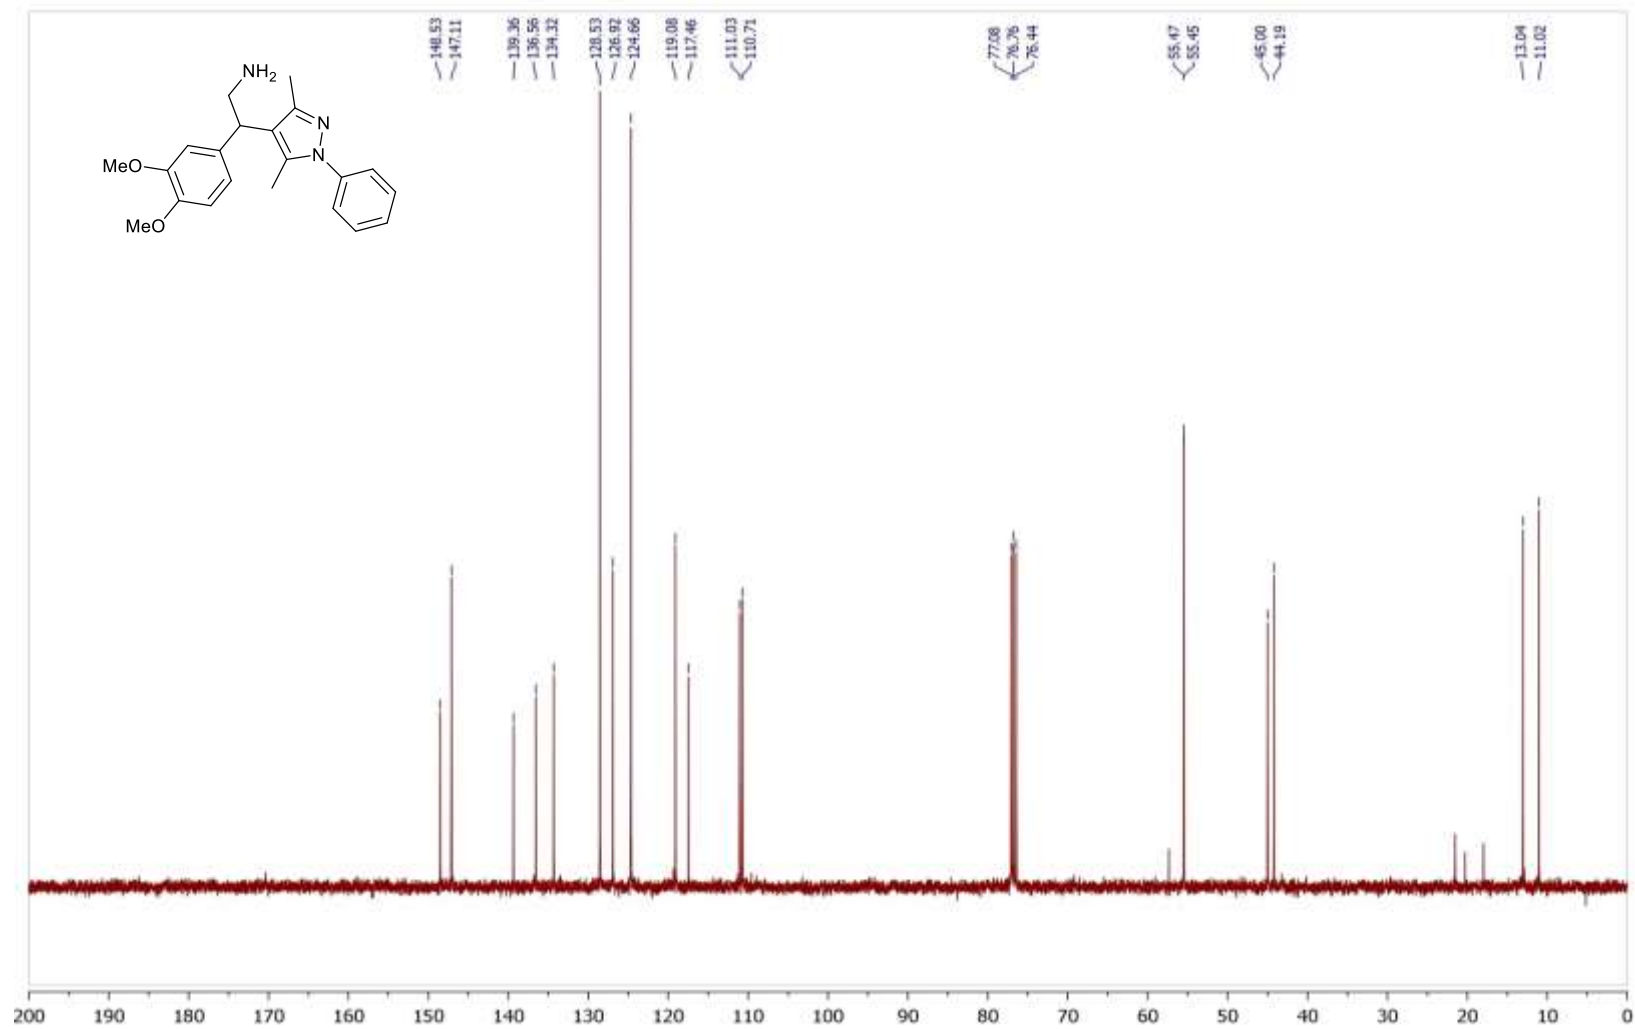

*1-[2-(3,4-Dimethoxyphenyl)-2-(3,5-dimethyl-1-phenyl-1H-pyrazol-4-yl)ethyl]pyrrolidine-2,5-dione (8)*

<sup>1</sup>H NMR (CDCl<sub>3</sub>, 600 MHz)

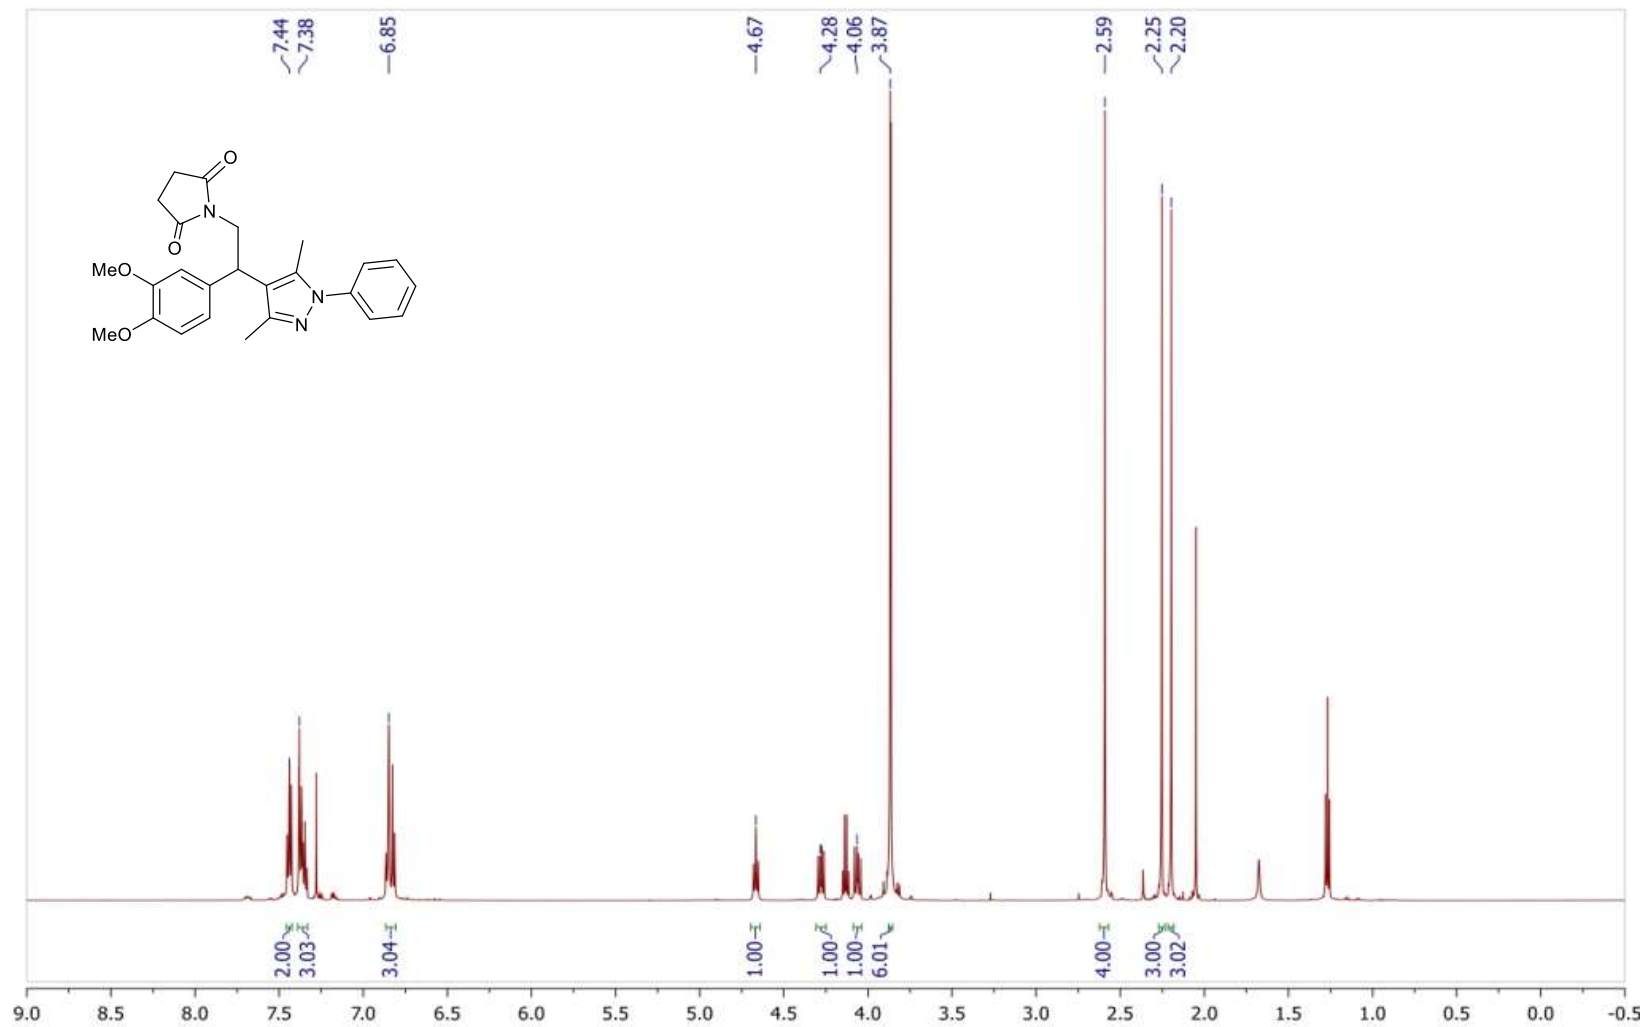

*1-[2-(3,4-Dimethoxyphenyl)-2-(3,5-dimethyl-1-phenyl-1H-pyrazol-4-yl)ethyl]pyrrolidine-2,5-dione (8)*

$^{13}\text{C}$  NMR ( $\text{CDCl}_3$ , 150 MHz)

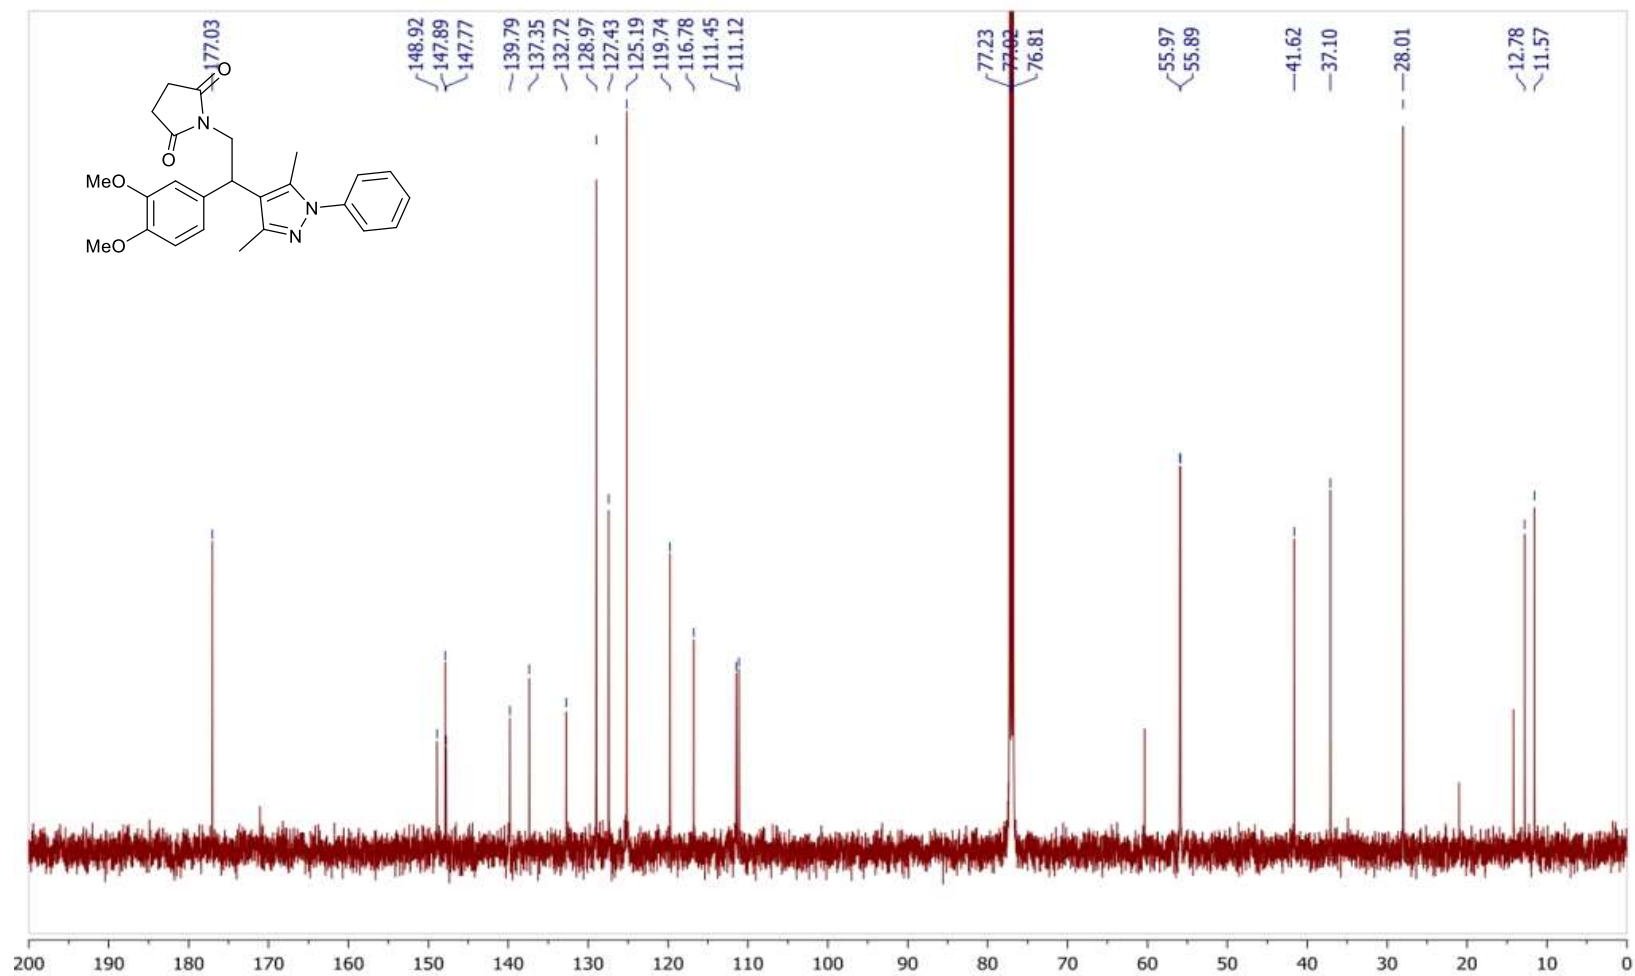

*1-[2-(3,4-Dimethoxyphenyl)-2-(3,5-dimethyl-1-phenyl-1H-pyrazol-4-yl)ethyl]-5-hydroxypyrrolidin-2-one (S1)*

<sup>1</sup>H NMR (CDCl<sub>3</sub>, 600 MHz)

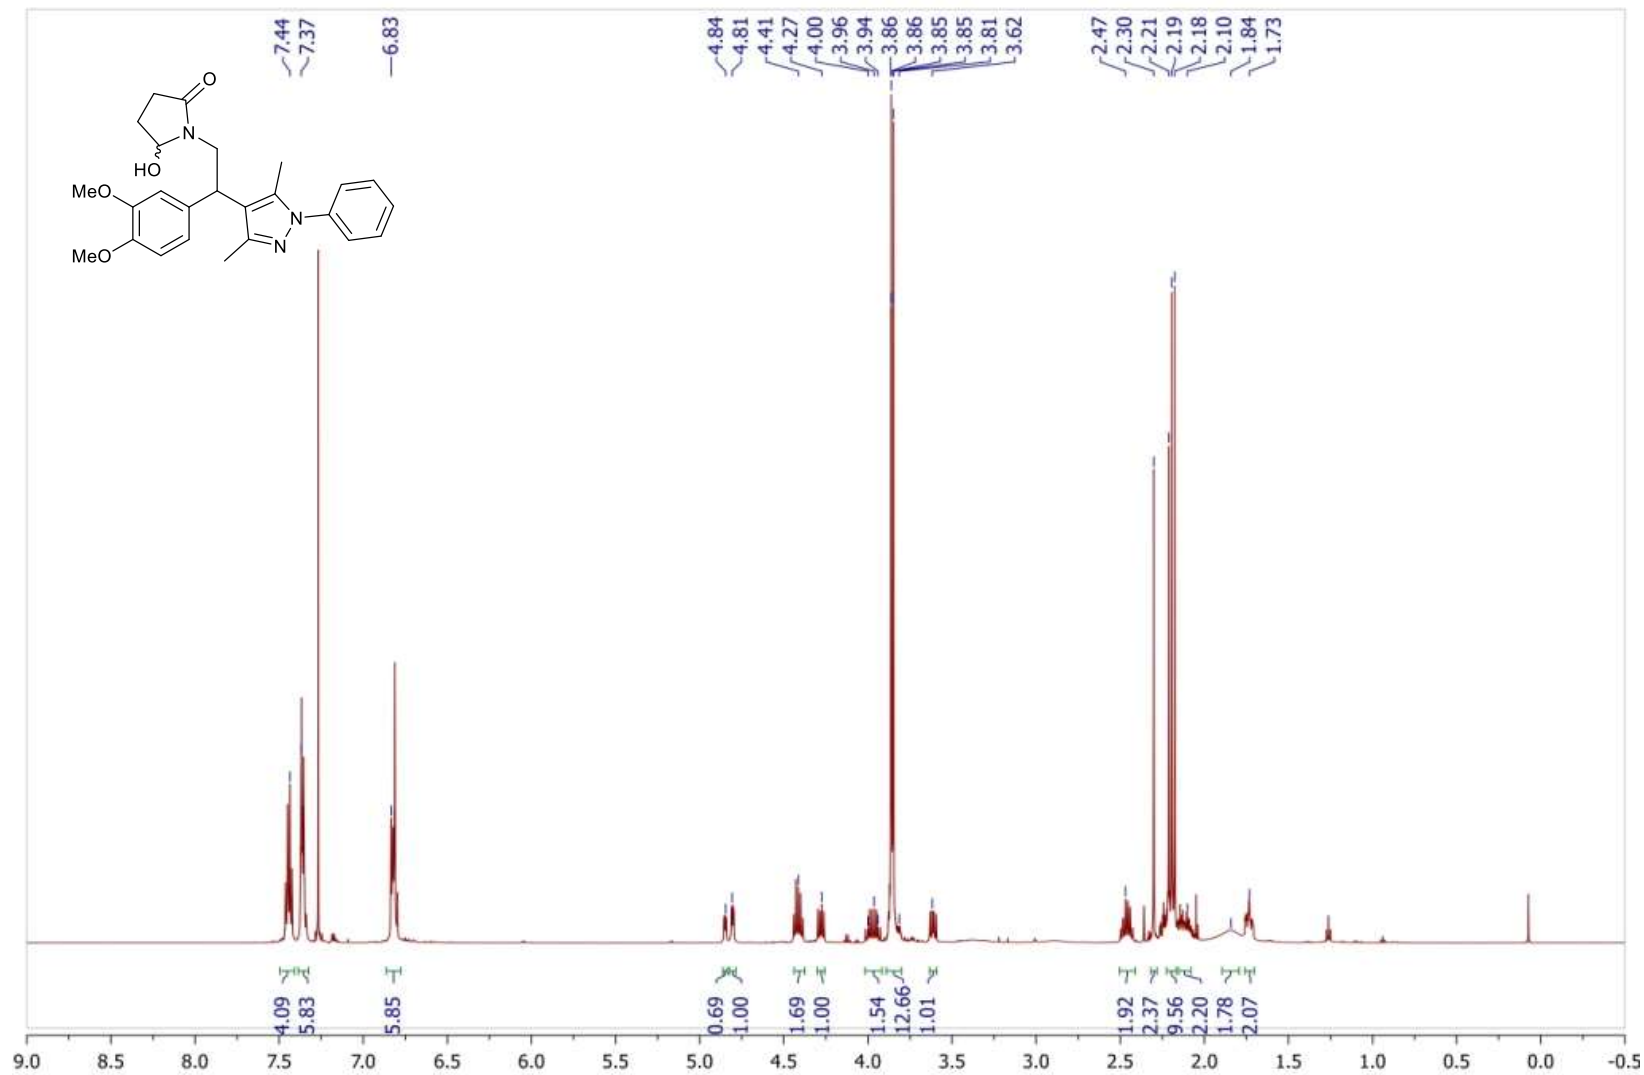

*1-[2-(3,4-Dimethoxyphenyl)-2-(3,5-dimethyl-1-phenyl-1H-pyrazol-4-yl)ethyl]-5-hydroxypyrrolidin-2-one (S1)*

<sup>13</sup>C NMR (CDCl<sub>3</sub>, 150 MHz)

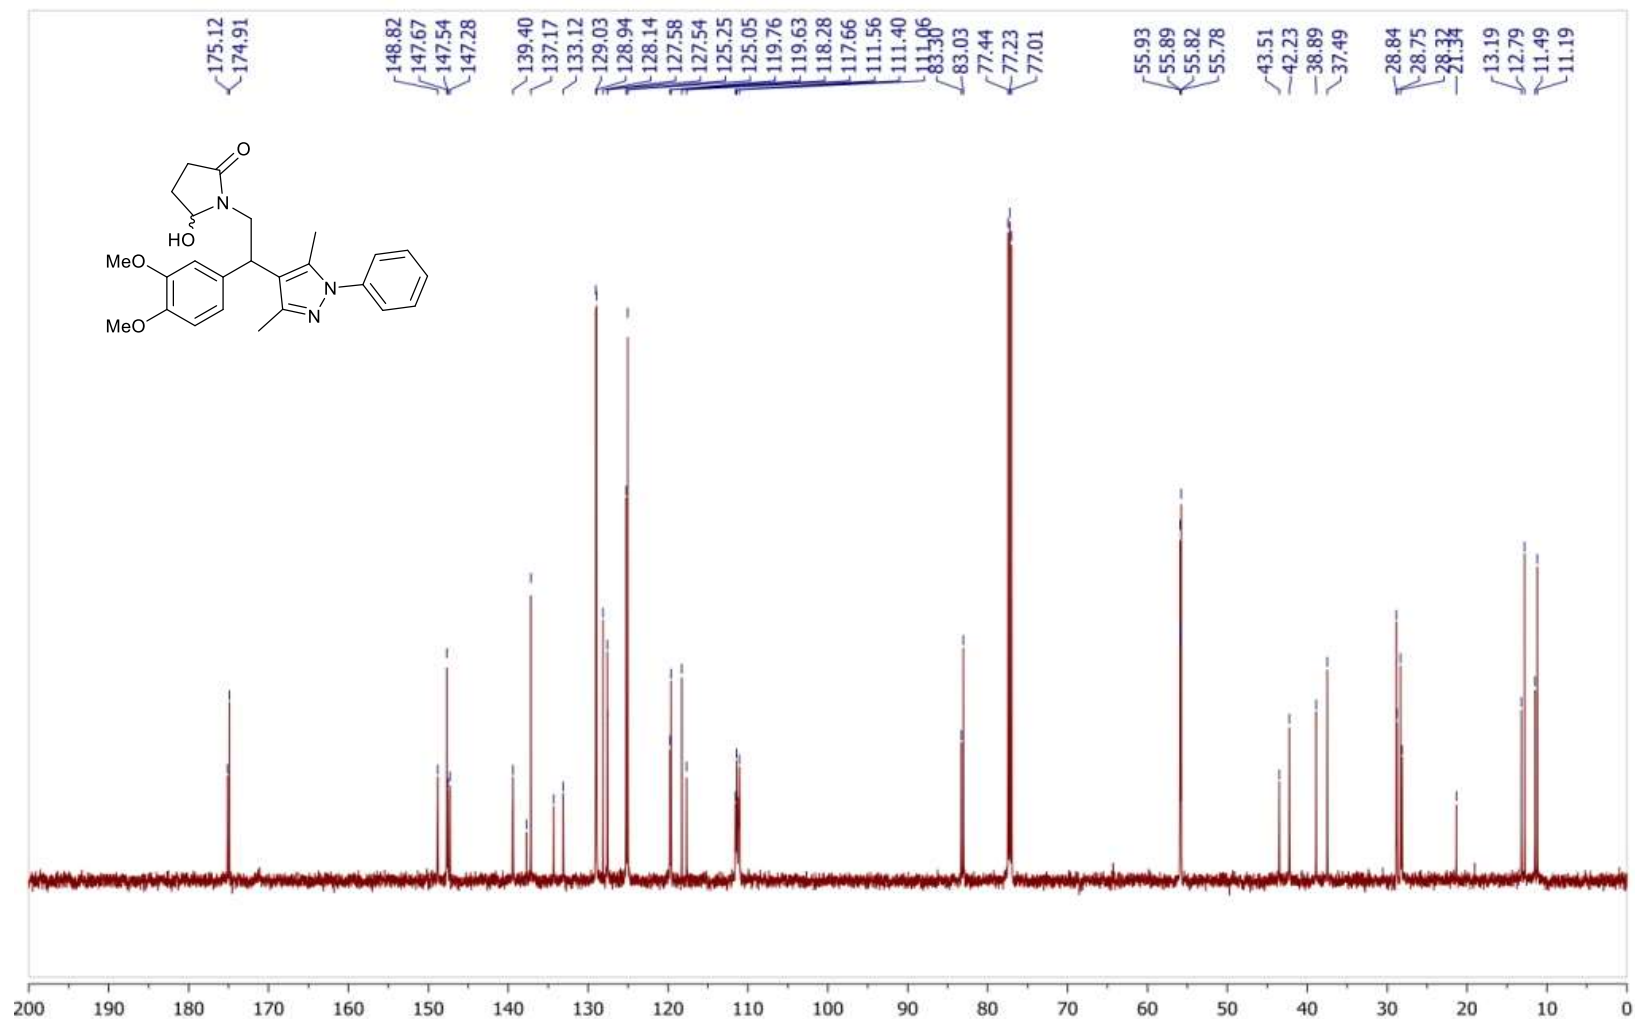

*(6RS,10bSR)*-6-(3,5-Dimethyl-1-phenyl-1H-pyrazol-4-yl)-8,9-dimethoxy-1,5,6,10b-tetrahydropyrrolo[2,1-a]isoquinolin-3(2H)-one (9)

<sup>1</sup>H NMR (CDCl<sub>3</sub>, 600 MHz)

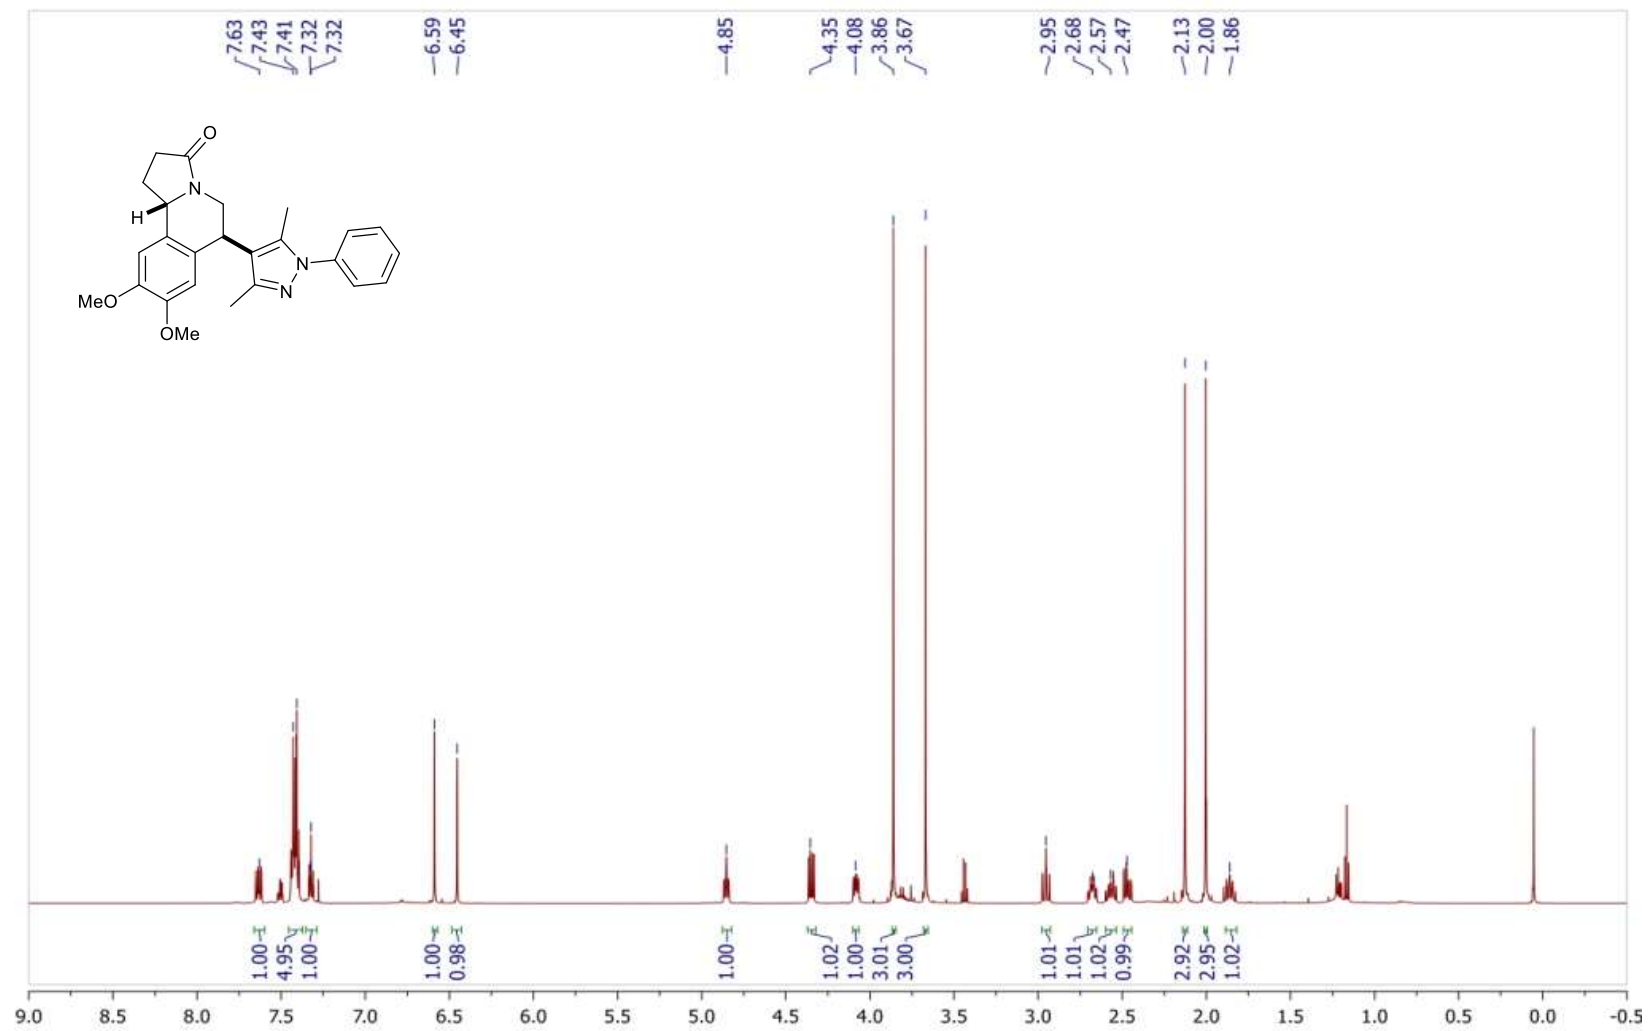

*(6RS,10bSR)*-6-(3,5-Dimethyl-1-phenyl-1H-pyrazol-4-yl)-8,9-dimethoxy-1,5,6,10b-tetrahydropyrrolo[2,1-a]isoquinolin-3(2H)-one (9)

$^{13}\text{C}$  NMR ( $\text{CDCl}_3$ , 150 MHz)

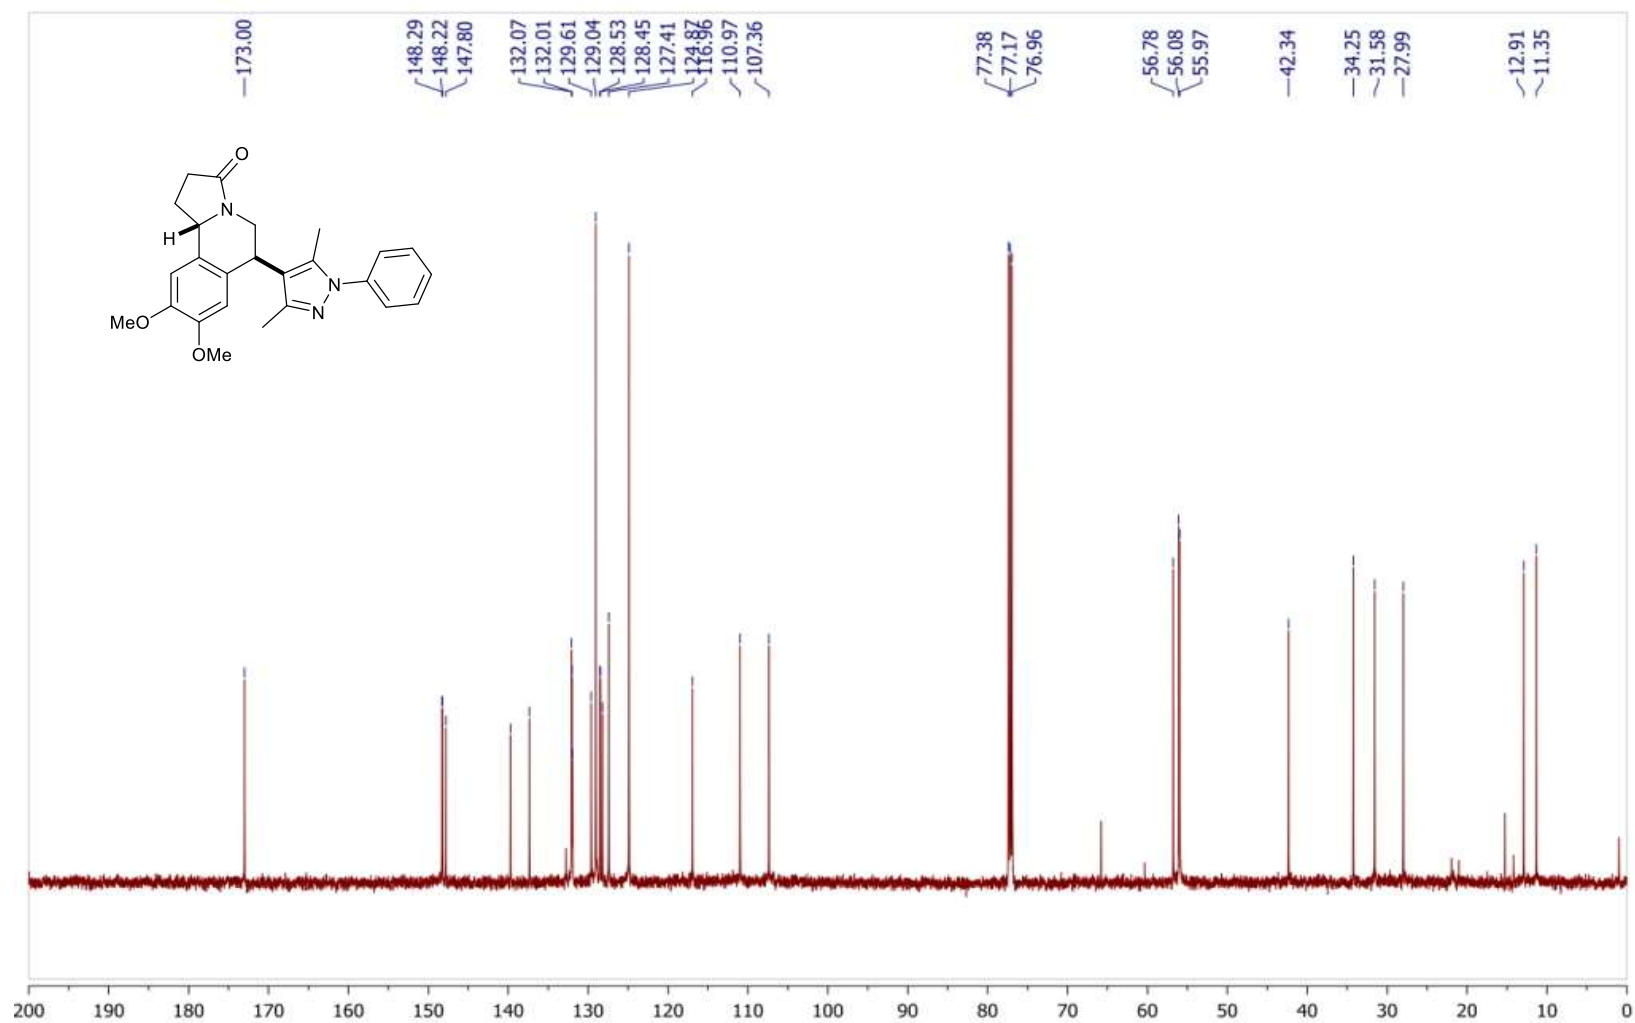

*(6R,10bS)-6-(3,5-Dimethyl-1-phenyl-1H-pyrazol-4-yl)-8,9-dimethoxy-1,5,6,10b-tetrahydropyrrolo[2,1-a]isoquinolin-3(2H)-one (9)*

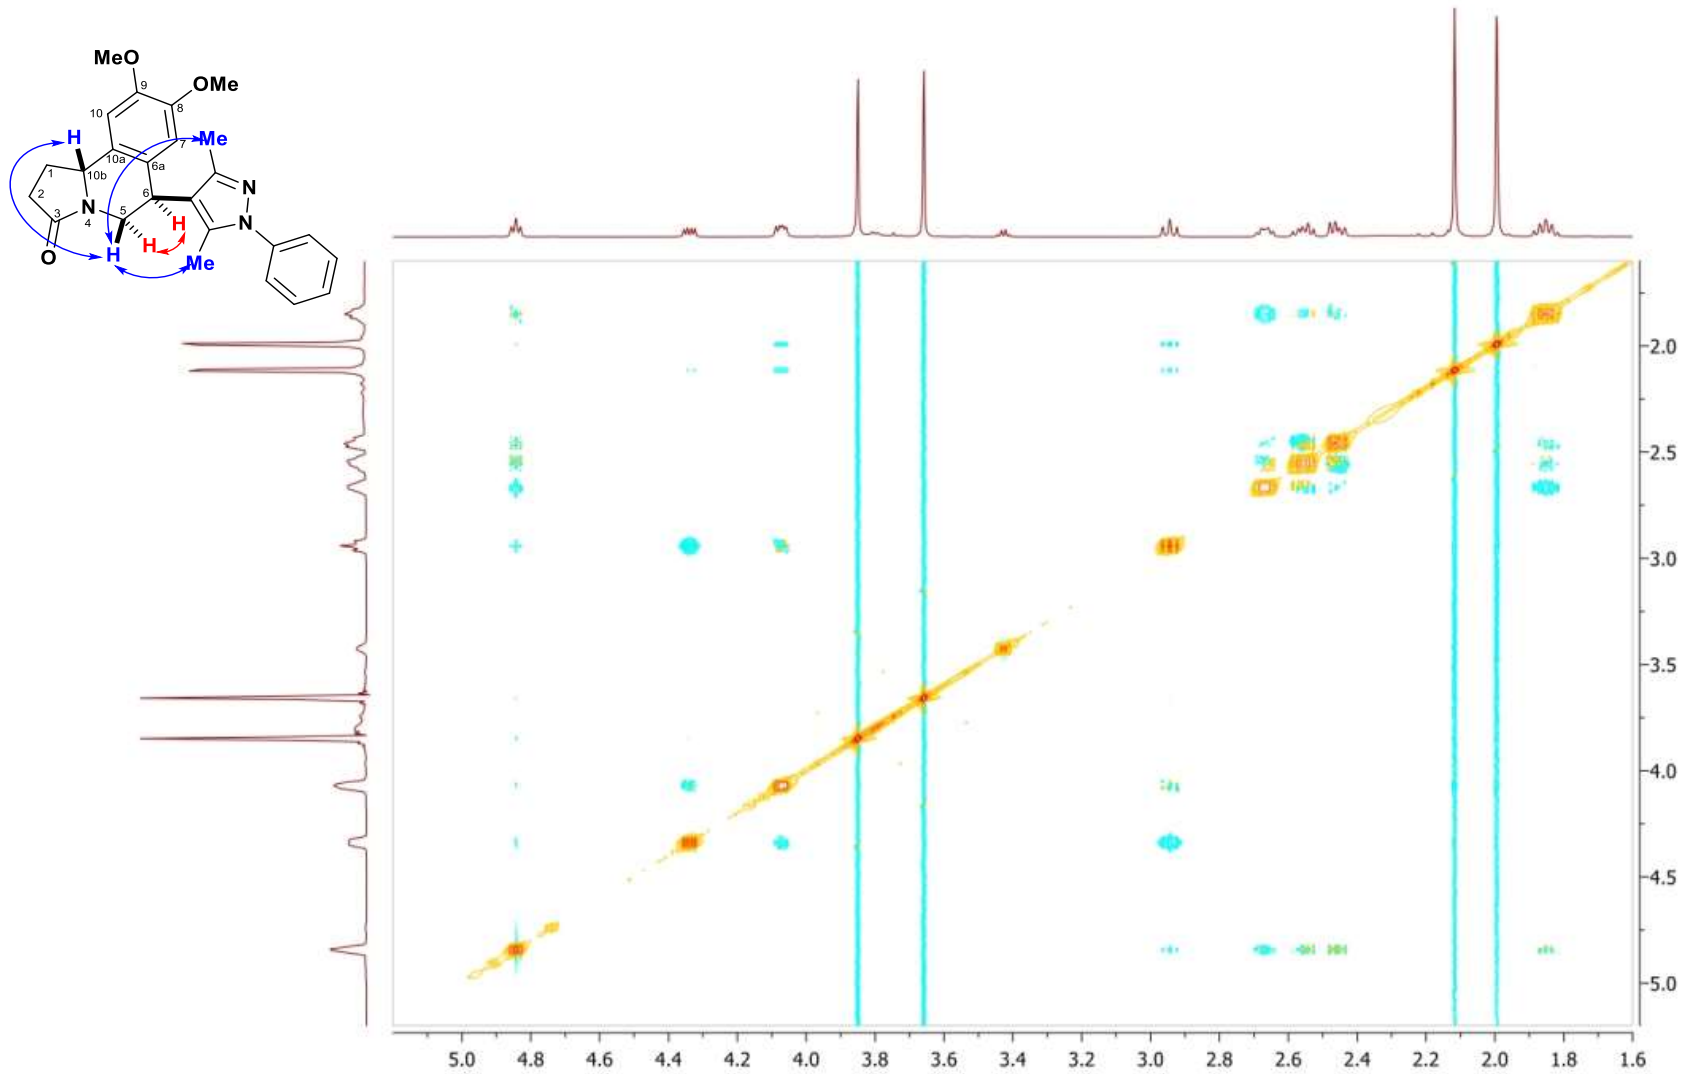



*(6RS,10bSR)*-6-(3,5-Dimethyl-1-phenyl-1H-pyrazol-4-yl)-8,9-dimethoxy-1,2,3,5,6,10b-hexahydropyrrolo[2,1-a]isoquinoline (10)

<sup>1</sup>H NMR (CDCl<sub>3</sub>, 600 MHz)

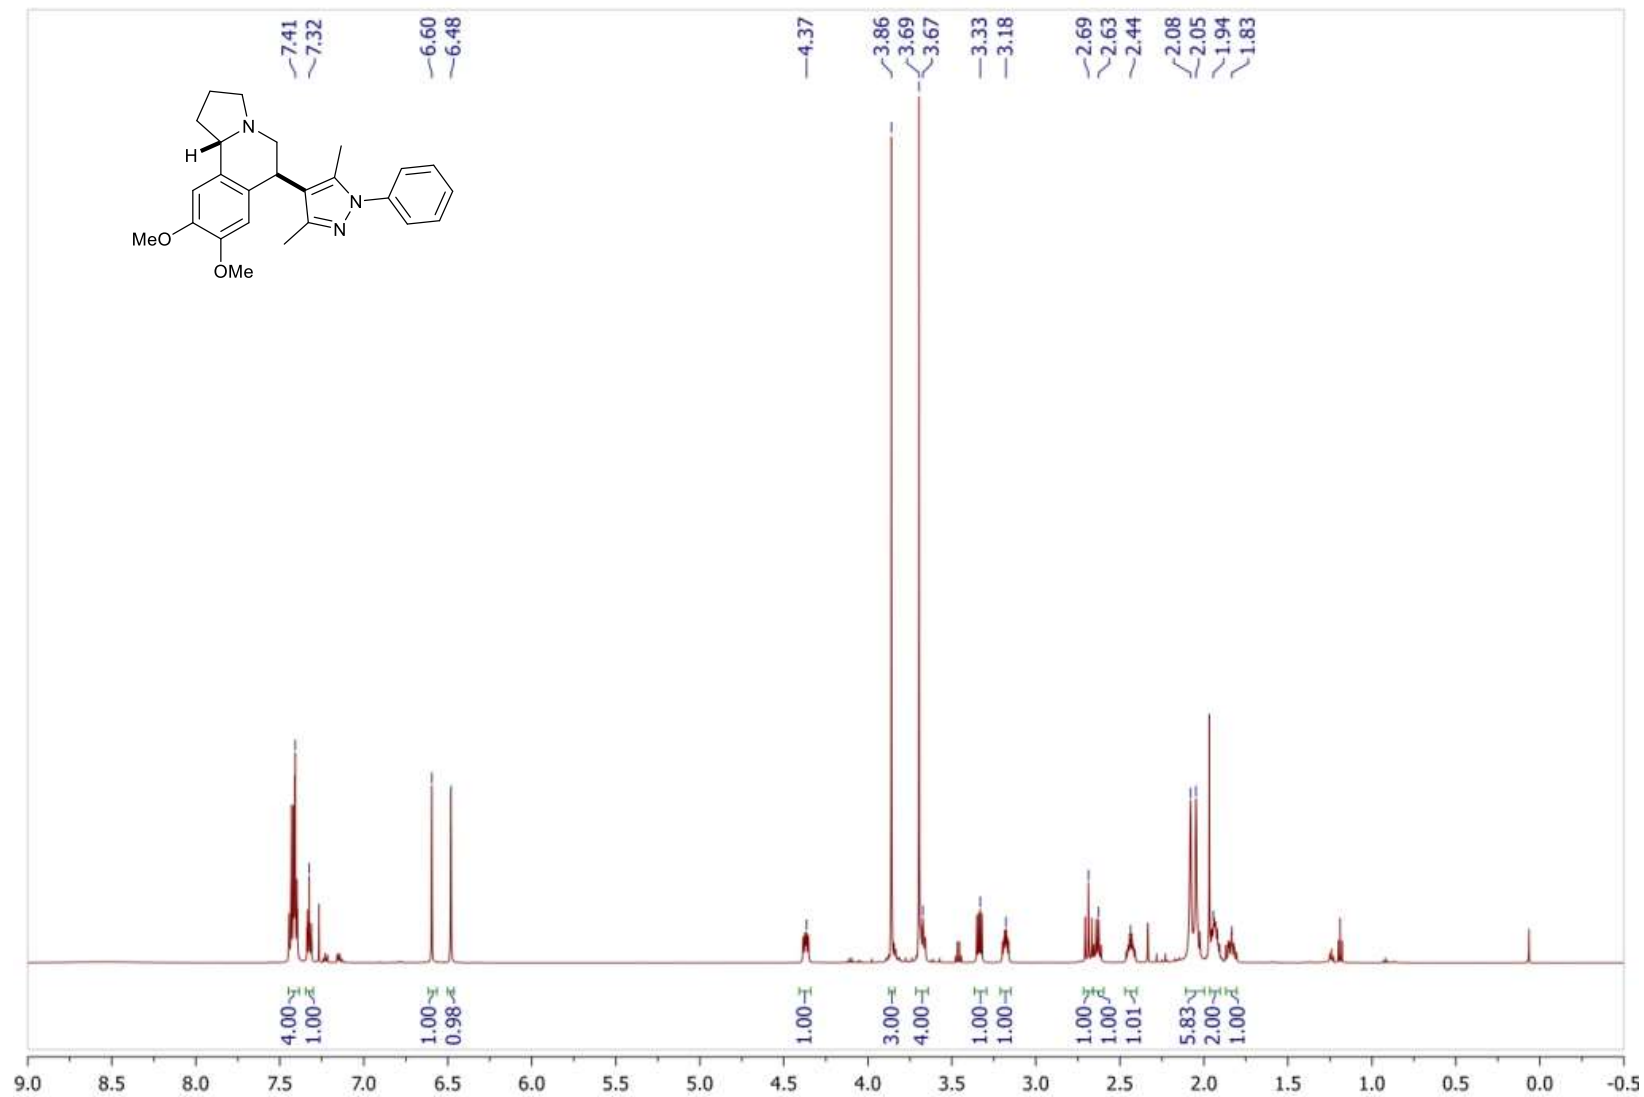

*(6R,10bSR)*-6-(3,5-Dimethyl-1-phenyl-1H-pyrazol-4-yl)-8,9-dimethoxy-1,2,3,5,6,10b-hexahydropyrrolo[2,1-a]isoquinoline (10)

<sup>13</sup>C NMR (CDCl<sub>3</sub>, 150 MHz)

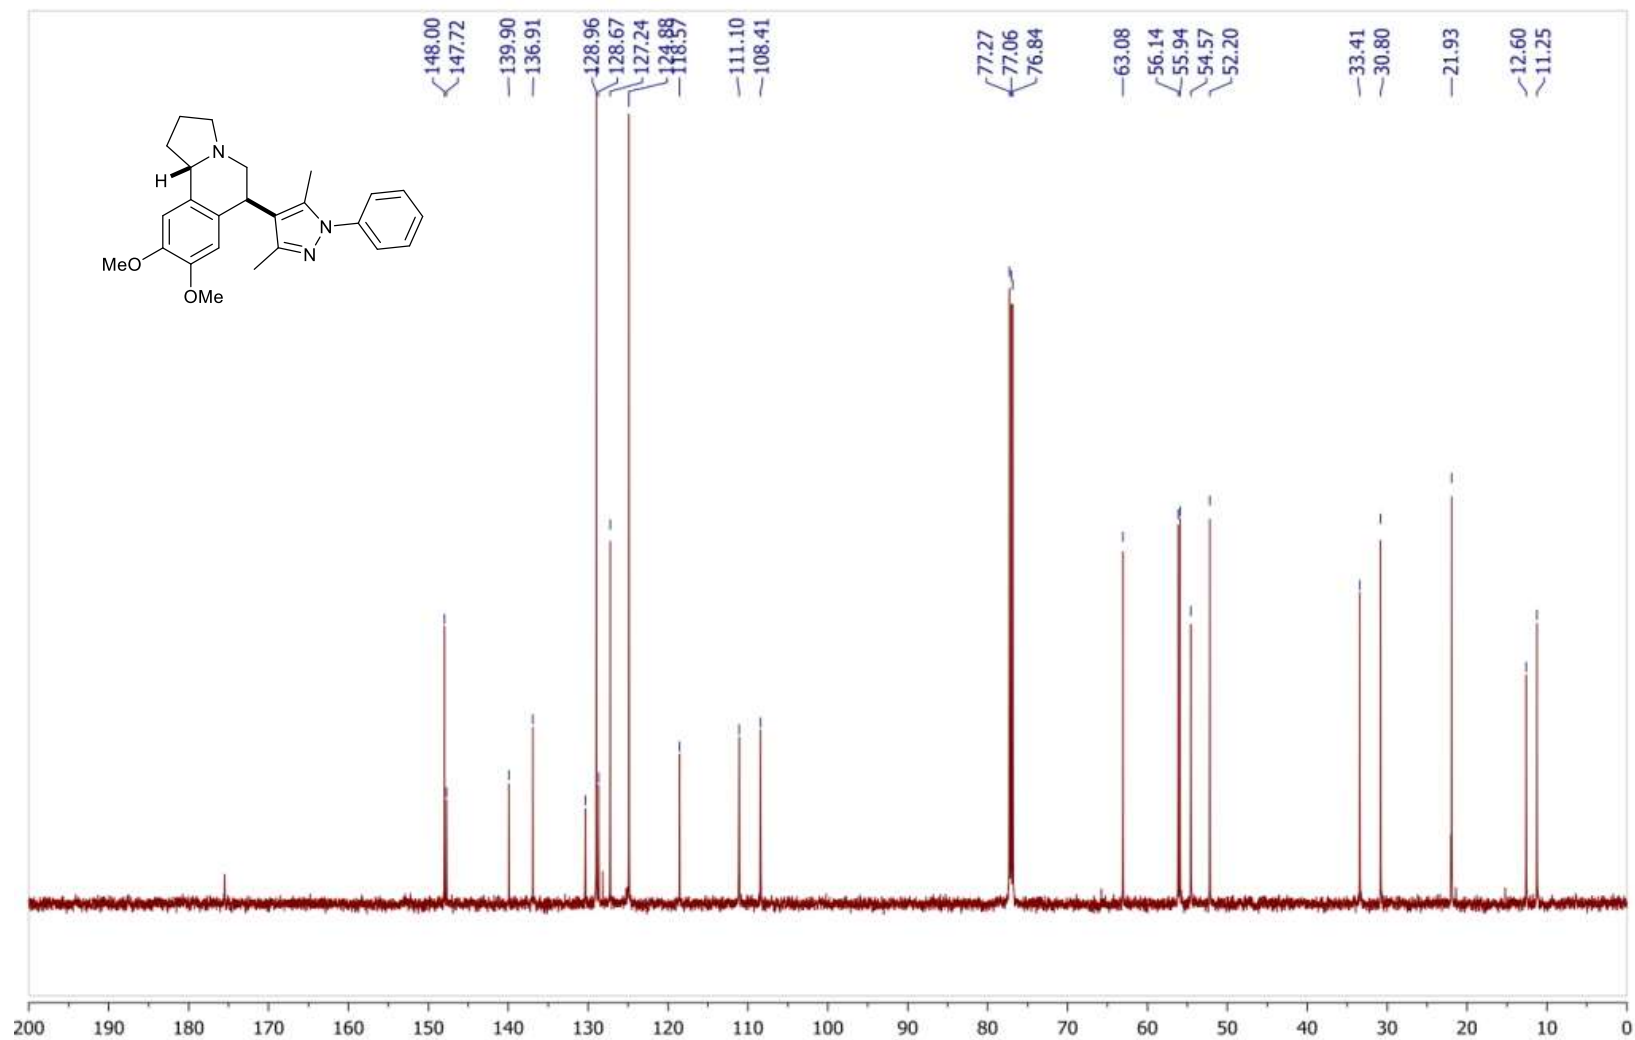

Supplement: c5ob02596f1.pdf [file c5ob02596f1.pdf]
